# Supplementary material for: Flagellin adjuvanted F1/V subunit plague vaccine induces T cell and functional antibody responses with unique gene signatures
Source: PubMed Central journal article supplement (PMC6978331; doi:10.1038/s41541-020-0156-y), 2020-01-23
Supplement: 41541_2020_156_MOESM1_ESM.pdf [file 41541_2020_156_MOESM1_ESM.pdf]

# Supplementary Text "Flagelin adjuvanted F1V subunit plague vaccine induces T cell and functional antibody responses with unique gene signatures"

August 1, 2019

## Contents

|          |                                                                 |           |
|----------|-----------------------------------------------------------------|-----------|
| <b>1</b> | <b>Introduction</b>                                             | <b>9</b>  |
| <b>2</b> | <b>Supplemental methods</b>                                     | <b>9</b>  |
| 2.1      | Analysis Cohort . . . . .                                       | 9         |
| 2.2      | Antibody, T-cell, and Cytokine Assays . . . . .                 | 9         |
| 2.2.1    | Derived Variables . . . . .                                     | 10        |
| 2.2.2    | Antibody, T-cell, and Cytokine Assays Analysis . . . . .        | 11        |
| 2.3      | RNA-Seq . . . . .                                               | 11        |
| 2.3.1    | RNA-Seq Experiment, Processing, Data QC and Filtering . . . . . | 11        |
| 2.3.2    | RNA-Seq Data Analysis . . . . .                                 | 13        |
| 2.4      | Software . . . . .                                              | 15        |
| <b>3</b> | <b>Supplemental Results</b>                                     | <b>16</b> |
| 3.1      | Antibody, T-cell, and Cytokine Results . . . . .                | 16        |
| 3.2      | Transcriptomics results . . . . .                               | 16        |

## List of Figures

|                         |                                                                                                                                                                                                                      |    |
|-------------------------|----------------------------------------------------------------------------------------------------------------------------------------------------------------------------------------------------------------------|----|
| Supplementary Figure 1  | Analysis population consort flow diagram . . . . .                                                                                                                                                                   | 19 |
| Supplementary Figure 2  | Scatterplots that summarize the correlation between $\log_2$ fold change in inverse Caspase-3 levels and $\log_2$ fold change in ELISA IgG for F1 antigen . . .                                                      | 20 |
| Supplementary Figure 3  | Scatterplots that summarize the correlation between $\log_2$ fold change in inverse Caspase-3 levels and $\log_2$ fold change in ELISA IgG for V antigen . . .                                                       | 21 |
| Supplementary Figure 4  | Scatterplots that summarize the correlation between $\log_2$ fold change in inverse Caspase-3 levels and $\log_2$ fold change in the stimulation index of proliferating CD4+/CFSElo/IL-6+ T-cells . . . . .          | 22 |
| Supplementary Figure 5  | Scatterplots that summarize the correlation between $\log_2$ fold change in inverse Caspase-3 levels and $\log_2$ fold change in the stimulation index of proliferating CD4+/CFSElo/IFN $\gamma$ + T-cells . . . . . | 23 |
| Supplementary Figure 6  | Boxplots of $\log_2$ counts per million before TMM normalization (RNA-Seq). . .                                                                                                                                      | 24 |
| Supplementary Figure 7  | Boxplots of $\log_2$ counts per million after TMM normalization (RNA-Seq). . .                                                                                                                                       | 25 |
| Supplementary Figure 8  | Empirical cumulative distribution function plots of $\log_2$ counts per million before and after TMM normalization (RNA-Seq). . . . .                                                                                | 26 |
| Supplementary Figure 9  | Spearman correlation heatmap (RNA-Seq). . . . .                                                                                                                                                                      | 27 |
| Supplementary Figure 10 | PCA biplots (RNA-Seq). . . . .                                                                                                                                                                                       | 28 |
| Supplementary Figure 11 | Non-metric multidimensional scaling biplots (RNA-Seq) . . . . .                                                                                                                                                      | 29 |
| Supplementary Figure 12 | Hierarchical clustering plots (RNA-Seq). . . . .                                                                                                                                                                     | 30 |
| Supplementary Figure 13 | Reverse empirical cumulative distribution function plots to assess lowly-expressed gene cut off (RNA-Seq). . . . .                                                                                                   | 31 |
| Supplementary Figure 14 | Reverse empirical cumulative distribution function plots to assess fold change cut off (RNA-Seq). . . . .                                                                                                            | 31 |
| Supplementary Figure 15 | Volcano and MA plots (RNA-Seq) . . . . .                                                                                                                                                                             | 32 |
| Supplementary Figure 16 | Pathway map - Amoebiasis (Day 28 post-second vaccination) . . . . .                                                                                                                                                  | 33 |
| Supplementary Figure 17 | Pathway map - Complement and coagulation cascades (Day 14 post-second vaccination) . . . . .                                                                                                                         | 34 |
| Supplementary Figure 18 | Pathway map - Complement and coagulation cascades (Day 28 post-second vaccination) . . . . .                                                                                                                         | 35 |
| Supplementary Figure 19 | Pathway map - Cytokine-cytokine receptor interaction (Day 14 post-second vaccination) . . . . .                                                                                                                      | 36 |
| Supplementary Figure 20 | Pathway map - Cytokine-cytokine receptor interaction (Day 28 post-second vaccination) . . . . .                                                                                                                      | 37 |
| Supplementary Figure 21 | Pathway map - Fluid shear stress and atherosclerosis (Day 14 post-second vaccination) . . . . .                                                                                                                      | 38 |
| Supplementary Figure 22 | Pathway map - Fluid shear stress and atherosclerosis (Day 28 post-second vaccination) . . . . .                                                                                                                      | 39 |
| Supplementary Figure 23 | Pathway map - Hematopoietic cell lineage (Day 28 post-second vaccination) .                                                                                                                                          | 40 |

|                         |                                                                                                                                                                                                                                            |    |
|-------------------------|--------------------------------------------------------------------------------------------------------------------------------------------------------------------------------------------------------------------------------------------|----|
| Supplementary Figure 24 | Pathway map - IL-17 signaling pathway (Day 28 post-second vaccination) . .                                                                                                                                                                 | 41 |
| Supplementary Figure 25 | Pathway map - Jak-STAT signaling pathway (Day 14 post-second vaccination)                                                                                                                                                                  | 42 |
| Supplementary Figure 26 | Pathway map - Osteoclast differentiation (Day 14 post-second vaccination) .                                                                                                                                                                | 43 |
| Supplementary Figure 27 | Pathway map - Osteoclast differentiation (Day 28 post-second vaccination) .                                                                                                                                                                | 44 |
| Supplementary Figure 28 | Pathway map - Phagosome (Day 28 post-second vaccination) . . . . .                                                                                                                                                                         | 45 |
| Supplementary Figure 29 | Pathway map - Proteoglycans in cancer (Day 14 post-second vaccination) . .                                                                                                                                                                 | 46 |
| Supplementary Figure 30 | Pathway map - Proteoglycans in cancer (Day 28 post-second vaccination) . .                                                                                                                                                                 | 47 |
| Supplementary Figure 31 | Pathway map - Rheumatoid arthritis (Day 28 post-second vaccination) . . . .                                                                                                                                                                | 48 |
| Supplementary Figure 32 | Pathway map - Staphylococcus aureus infection (Day 14 post-second vacci-<br>nation) . . . . .                                                                                                                                              | 49 |
| Supplementary Figure 33 | Pathway map - Staphylococcus aureus infection (Day 28 post-second vacci-<br>nation) . . . . .                                                                                                                                              | 50 |
| Supplementary Figure 34 | Pathway map - Tuberculosis (Day 14 post-second vaccination) . . . . .                                                                                                                                                                      | 51 |
| Supplementary Figure 35 | Pathway map - Tuberculosis (Day 28 post-second vaccination) . . . . .                                                                                                                                                                      | 52 |
| Supplementary Figure 36 | Pathway enrichment Venn diagrams (RNA-Seq) . . . . .                                                                                                                                                                                       | 53 |
| Supplementary Figure 37 | Scatterplots that summarize the correlation between $\log_2$ Inverse Caspase-3<br>Levels and $\log_2$ fold change response for genes identified using regularized<br>linear regression (RNA-Seq, Day 14 post-second vaccination) . . . . . | 54 |
| Supplementary Figure 38 | Canonical correlation plots (RNA-Seq/(RNA-Seq, Day 14 post-second vacci-<br>nation)) . . . . .                                                                                                                                             | 55 |
| Supplementary Figure 39 | Canonical correlation plots (RNA-Seq/(RNA-Seq, Day 14 post-second vacci-<br>nation)) . . . . .                                                                                                                                             | 56 |
| Supplementary Figure 40 | Canonical correlation plots (RNA-Seq/(RNA-Seq, Day 28 post-second vacci-<br>nation)) . . . . .                                                                                                                                             | 57 |

## List of Tables

|                        |                                                                                                                                                           |     |
|------------------------|-----------------------------------------------------------------------------------------------------------------------------------------------------------|-----|
| Supplementary Table 1  | Summary of categorical demographic and baseline characteristics for the immunogenicity analysis population . . . . .                                      | 58  |
| Supplementary Table 2  | Summary of age demographic characteristics for the immunogenicity analysis population . . . . .                                                           | 58  |
| Supplementary Table 3  | Summary of categorical demographic and baseline characteristics for the transcriptomics analysis population . . . . .                                     | 59  |
| Supplementary Table 4  | Summary of age demographic characteristics for the transcriptomics analysis population . . . . .                                                          | 59  |
| Supplementary Table 5  | Summaries of inverse normalized anti-V-antigen antibody caspase-3 levels by study visit day and treatment group . . . . .                                 | 60  |
| Supplementary Table 6  | Summaries of the fold change in inverse normalized anti-V-antigen antibody caspase-3 levels by study visit day and treatment group . . . . .              | 61  |
| Supplementary Table 7  | Spearman correlation between fold change in ELISA IgG and change in protective antibody response . . . . .                                                | 62  |
| Supplementary Table 8  | Wilcoxon Signed Rank Test (Proliferating and cytokine producing T cell and cytokine responses, F1/V 10ug/ml) . . . . .                                    | 63  |
| Supplementary Table 9  | Spearman correlation between fold change in proliferating and cytokine producing CD4+ T cell stimulation index and change in protective antibody response | 64  |
| Supplementary Table 10 | Genes differentially expressed at Day 14 post-second vaccination compared to Day 0 (RNA-Seq). . . . .                                                     | 65  |
| Supplementary Table 11 | Genes differentially expressed at Day 28 post-second vaccination compared to Day 0 (RNA-Seq). . . . .                                                     | 85  |
| Supplementary Table 12 | KEGG Pathways enriched in differentially expressed genes at Day 14 post-second vaccination (RNA-Seq) . . . . .                                            | 103 |
| Supplementary Table 13 | MSigDB Reactome Pathways enriched in differentially expressed genes at Day 14 post-second vaccination (RNA-Seq) . . . . .                                 | 103 |
| Supplementary Table 14 | MSigDB Immunologic Signature Sets enriched in differentially expressed genes at Day 14 post-second vaccination (RNA-Seq) . . . . .                        | 103 |
| Supplementary Table 15 | GO Biological Processes enriched in differentially expressed genes at Day 14 post-second vaccination (RNA-Seq) . . . . .                                  | 105 |
| Supplementary Table 16 | GO Cellular Components enriched in differentially expressed genes at Day 14 post-second vaccination (RNA-Seq) . . . . .                                   | 107 |
| Supplementary Table 17 | GO Molecular Functions enriched in differentially expressed genes at Day 14 post-second vaccination (RNA-Seq) . . . . .                                   | 107 |
| Supplementary Table 18 | KEGG Pathways enriched in differentially expressed genes at Day 28 post-second vaccination (RNA-Seq) . . . . .                                            | 107 |
| Supplementary Table 19 | MSigDB Reactome Pathways enriched in differentially expressed genes at Day 28 post-second vaccination (RNA-Seq) . . . . .                                 | 108 |

|                        |                                                                                                                                                      |     |
|------------------------|------------------------------------------------------------------------------------------------------------------------------------------------------|-----|
| Supplementary Table 20 | MSigDB Immunologic Signature Sets enriched in differentially expressed genes at Day 28 post-second vaccination (RNA-Seq) . . . . .                   | 108 |
| Supplementary Table 21 | GO Biological Processes enriched in differentially expressed genes at Day 28 post-second vaccination (RNA-Seq) . . . . .                             | 110 |
| Supplementary Table 22 | GO Cellular Components enriched in differentially expressed genes at Day 28 post-second vaccination (RNA-Seq) . . . . .                              | 112 |
| Supplementary Table 23 | GO Molecular Functions enriched in differentially expressed genes at Day 28 post-second vaccination (RNA-Seq) . . . . .                              | 112 |
| Supplementary Table 24 | Combination of genes correlated with <i>log<sub>2</sub></i> transformed inverse Caspase-3 levels (RNA-Seq, Day 14 post-second vaccination) . . . . . | 113 |
| Supplementary Table 25 | Regularized canonical correlation analysis model summary statistics (RNA-Seq)                                                                        | 114 |
| Supplementary Table 26 | Number of excluded genes by gene type (RNA-Seq) . . . . .                                                                                            | 115 |
| Supplementary Table 27 | Overview of gene sets used for the enrichment analysis (RNA-Seq). . . . .                                                                            | 115 |
| Supplementary Table 28 | Summary human reference genome alignment statistics (RNA-Seq) . . . . .                                                                              | 115 |
| Supplementary Table 29 | Summary human reference gene model alignment statistics (RNA-Seq) . . . . .                                                                          | 115 |
| Supplementary Table 30 | Number of genes that passed the low expression cut off (RNA-Seq) . . . . .                                                                           | 116 |
| Supplementary Table 31 | Regularized linear logistic regression model summary statistics (RNA-Seq) . .                                                                        | 117 |
| Supplementary Table 32 | List of R packages and versions used for the analyses presented in this report. .                                                                    | 117 |

## Abbreviations

|        |                                                                    |
|--------|--------------------------------------------------------------------|
| AE     | Adverse Event                                                      |
| CDF    | Cumulative distribution function                                   |
| CFR    | Code of Federal Regulations                                        |
| CFSE   | Carboxyfluorescein succinimidyl ester                              |
| CI     | Confidence Interval                                                |
| CIOMS  | Council for International Organizations of Medical Sciences        |
| CMI    | Cell-Mediated Immunity                                             |
| CRF    | Case Report Form                                                   |
| DA     | Differentially Abundant                                            |
| DE     | Differentially Expressed                                           |
| DHHS   | Department of Health and Human Services                            |
| DMID   | Division of Microbiology and Infectious Diseases, NIAID, NIH, DHHS |
| DNA    | Deoxyribonucleic Acid                                              |
| DSMB   | Data and Safety Monitoring Board                                   |
| FDA    | Food and Drug Administration                                       |
| FDR    | False Discovery Rate                                               |
| FWA    | Federalwide Assurance                                              |
| GCP    | Good Clinical Practice                                             |
| GTF    | Gene Transfer Format                                               |
| ICF    | Informed Consent Form                                              |
| ICH    | International Council on Harmonisation                             |
| IFN    | Interferon                                                         |
| IgG    | Immunoglobulin G                                                   |
| IGL    | Immunoglobulin Lambda                                              |
| IL     | Interleukin                                                        |
| IRB    | Institutional Review Board                                         |
| ISM    | Independent Safety Monitor                                         |
| JAMA   | Journal of the American Medical Association                        |
| KEGG   | Kyoto Encyclopedia of Genes and Genomes                            |
| LCPM   | Log <sub>2</sub> Counts Per Million                                |
| LFC    | Log <sub>2</sub> Fold Change                                       |
| MEDRA  | Medical Dictionary for Regulatory Activities                       |
| MOP    | Manual of Procedures                                               |
| MSigDB | Molecular Signatures Database                                      |
| MOI    | Multiplicity of Infection                                          |

|          |                                                                  |
|----------|------------------------------------------------------------------|
| mt-rRNAs | Mitochondrial rRNAs                                              |
| mt-tRNAs | Mitochondrial tRNAs                                              |
| N        | Number (typically refers to subjects)                            |
| NEJM     | New England Journal of Medicine                                  |
| NIAID    | National Institute of Allergy and Infectious Diseases, NIH, DHHS |
| NIH      | National Institutes of Health                                    |
| NHP      | Nonhuman primates                                                |
| OCRA     | Office of Clinical Research Affairs, DMID, NIAID, NIH, DHHS      |
| OHRP     | Office for Human Research Protections                            |
| ORA      | Office of Regulatory Affairs, DMID, NIAID, NIH, DHHS             |
| PBMC     | Peripheral Blood Mononuclear Cells                               |
| PBMC     | Peripheral Blood Mononuclear Cells                               |
| PCA      | Principal component analysis                                     |
| PCTC     | Proliferating and Cytokine Producing T Cells                     |
| PHI      | Personal Health Information                                      |
| PI       | Principal Investigator                                           |
| RCCA     | Regularized Canonical Correlation Analysis                       |
| RCDF     | Reverse cumulative distribution function                         |
| rYPt     | recombinant Yersinia pseudotuberculosis                          |
| RNA      | Ribonucleic Acid                                                 |
| SAE      | Serious Adverse Event                                            |
| SDCC     | Statistical and Data Coordinating Center                         |
| SMC      | Safety Monitoring Committee                                      |
| SAP      | Statistical Analysis Plan                                        |
| SOC      | System Organ Class                                               |
| SOP      | Standard Operating Procedure                                     |
| TMM      | Trimmed Mean of M-values                                         |
| TNF      | Tumor Necrosis Factor                                            |
| US       | United States                                                    |
| VTEU     | Vaccine and Treatment Evaluation Unit                            |
| WHO      | World Health Organization                                        |
| Yp       | Yersinia pestis                                                  |

## Copyright Notice:

The KEGG image files and limited text-based data summary files (**collectively**, the "KEGG Data Snapshots") provided herein are copyright ©Kanehisa Laboratories. All rights reserved. By accepting the KEGG Data Snapshots, following terms shall be automatically accepted without limitation:

- Redistribution of the KEGG Data Snapshots is strictly prohibited.
- KEGG Data Snapshots may not be used outside of their intended purpose as part of a summary of a data analysis. For example, the data may not be stored or assembled in order to create an internal database, even for personal use.
- A limited number of images included in the KEGG Data Snapshots may be published in printed media with appropriate attributes as is standard in academia.
- The rights granted hereunder are non-transferable.



## 1 Introduction

This supplemental text provides supporting information for the manuscript entitled "Flagelin adjuvanted F1V subunit plague vaccine induces T cell and functional antibody responses with unique gene signatures". Serum and PBMC samples were tested for three time points (pre-vaccination, and days 14 and 28 post-second dose) from participants vaccinated with 6 mcg (n=8) and 10 mcg (n=8) of flagellin-adjuvanted F1/V vaccine ([Supplementary Figure 1](#)). Pre- and post-vaccination assessments included protective function of antibodies (caspase-3), proliferating and cytokine-producing T cells, cytokines, and PBMC transcriptional profiles. Transcriptomics analysis included the identification of genes that differed in their response from pre-vaccination, co-expressed gene clusters, and enriched pathways. Transcriptomics response profiles were correlated with each of the three other immunogenicity assays. In addition, correlations between the protective function of antibodies and IgG ELISA results were evaluated.

## 2 Supplemental methods

### 2.1 Analysis Cohort

Three subjects in the analysis cohort consented to de-identified future use. Categorical demographic and baseline characteristics for the remaining 13 subjects were summarized for all subjects in the analysis cohort ([Supplementary Table 3](#)). Ten subjects (n=10, 77%) were male and three were female (n=3, 23%). All were of non-Hispanic ethnicity (n=13, 100%). Ten subjects (n=10, 77%) classified themselves as white race, one subject classified themselves as American Indian or Alaska Native race (n=1, 8%), one as Asian (n=1, 8%), and one as Black or African American (n=1, 8%). Continuous demographic and baseline characteristics for the 13 subjects are summarized in [Supplementary Table 4](#). The mean age for subjects was 30.3 years (range: 21-42) with a median age of 29 years.

### 2.2 Antibody, T-cell, and Cytokine Assays

**Macrophage-protective function of antibody responses** Anti-V-antigen antibody caspase-3 assay was used to measure the function of antibodies to protect macrophages from the cytotoxicity of *Yersinia*. Recombinant *Yersinia pseudotuberculosis* expressing V antigen was pretreated with serum. The pretreated bacteria was added into a commercially available macrophage cell line in 96 well plates. Caspase-3 in the culture supernatants was quantified 1.5 hours later using a caspase-3 assay kit (EnzChek).

**Optimized CFSE-based flow cytometric assay** Three concentrations of killed recombinant *Y. pseudotuberculosis* expressing V antigens (20) and four concentrations of mixed F1 and V *Y. pestis* antigens were used to identify the optimal antigen concentration for stimulation of CMI. At different time points (days 3-10), cells were stained for surface markers such as CD3 and CD4, and intracellular cytokines such

as interferon (IFN)-gamma and interleukin (IL) 4. Flow-cytometric acquisition was performed by using a multi-color BD FACSCanto II instrument, and analyses was done using CellQuest and FlowJo (Tree Star) software. A minimum of 10,000 CD4+ events were to be acquired. Cells with decreased CFSE fluorescence were considered as proliferating cells. The absolute numbers of effector CD4+ T cells were calculated by multiplying the total number of viable cells recovered by the percentage of the specific T cell subset detected by flow-cytometric analysis. Stimulation index was obtained by calculating the ratio of stimulated versus unstimulated (medium rest control) T cells that both proliferated and produced cytokine as measured by flow cytometry. Mann-Whitney U tests were used to analyze differences in the expansions of CD4+ T cells in samples from vaccinated and non-vaccinated participants. Optimal antigen concentration and duration of stimulation was selected based on the highest vaccine-specific CD4+ T cell responses.

The optimized CFSE-based flow cytometric assay was then used to measure CMI in pre-vaccination and post-vaccination PBMC from participants who received 6 to 10 mcg of flagellin-adjuvanted F1/V vaccine. The CFSE-assay was performed using optimal antigen concentrations and the optimal culture duration before staining for surface markers such as CD3, CD4 and CD8 as well as intracellular cytokines such as (IFN- $\gamma$ , IL-2, TNF- $\alpha$ , IL 4, IL-6, IL-10). Flow cytometry was performed as described above.

**Cytokine assay** Culture supernatants from the optimized CFSE-based assay were used for measurement of cytokines using a cytokine bead array (Becton Dickinson). This array allowed a detailed characterization of Th1, Th2 and Th17 cytokine levels, and was a powerful supplement to the results from CFSE-based assays.

### 2.2.1 Derived Variables

**Macrophage-protective function of antibodies** Caspase-3 levels were assessed as the mean of triplicate measurements. Serum-free infected controls were used for normalization. Infected control normalization was carried out by dividing mean sample caspase-3 levels by serum-free infected control caspase-3 levels. Higher normalized caspase-3 levels values indicated lower protection and vice versa. For a more intuitive interpretation of protective function of antibodies, the inverse of the normalized caspase-3 level variable was analyzed and summarized.

**Stimulation index (proliferating and cytokine-producing T cells)** Sample CFSE PCTC results (absolute number of T-cells) for a certain cytokine-producing T cell subset following sample antigen stimulation were divided by respective CFSE results (absolute number of T-cells) of the respective medium rested (unstimulated) T cells subset from the same sample.

**Stimulation index (Th1, Th2 and Th17 cytokines)** Sample cytokine bead array results (pg/mL) for a certain cytokine (IL-17A, IFN- $\gamma$ , TNF, IL-10, IL-6, IL-4, and IL-2) level following sample antigen stimulation were divided by respective cytokine levels (pg/mL) of unstimulated (medium rested) results from the same sample.

**Peak Responses** For gene expression correlation analyses, peak protective function of antibodies (inverse of normalized caspase-3 levels) was calculated as the maximum fold change per subject at Day 14 or 28 post-second vaccination compared to Day 0.

### 2.2.2 Antibody, T-cell, and Cytokine Assays Analysis

The protective function of antibodies (inverse of normalized caspase-3 levels), stimulation index of proliferating and cytokine-producing T cells, and stimulation index (ratio for cytokines) was summarized using minimum, Q1, median, Q3, maximum, and 95% CI of the median. Summaries were provided by visit and study arm, as well as pooled across study arms. The 95% confidence interval (CI) of the median was obtained using the bootstrap method using 1,000 replicates for each visit and study arm combination. Similarly, fold change compared to pre-vaccination was summarized. Time trends of median fold change and associated 95% bootstrap CIs were visualized. Pre-vaccination and post-vaccination results were contrasted using boxplots. Statistically significant changes for each post-vaccination day compared to pre-vaccination measurements were assessed for combined study arms using a two-sided Wilcoxon Signed-Rank test with an individual alpha level of 0.05.

## 2.3 RNA-Seq

### 2.3.1 RNA-Seq Experiment, Processing, Data QC and Filtering

**RNA-Seq Experiment** RNA-Seq was carried out using single-end 50 base read sequencing using an Illumina HiSeq3000 sequencer. Fourty-one libraries were multiplexed across 4 sequencing lanes with targeted coverage of 39 million reads per library.

**RNA-Seq Data Processing** The latest version of the human reference genome assembly (GRCh38), gene models, and associated gene annotation information in the form of a Gene Transfer Format (GTF) file were obtained from the ENSEMBL database (Version 90). The genomic reference was built by merging all human chromosomes except for X and Y chromosomes (to avoid gender-specific effects). Sequences of known human rRNAs, rRNA pseudogenes, tRNA pseudogenes, mitochondrial rRNAs (mt-rRNAs), mitochondrial tRNAs (mt-tRNAs), and mt-rRNA pseudogenes were obtained from the Ensembl database (Version 90, August 2017) using the *biomaRt* R package (Version 2.32.1). Known human tRNA sequences

were obtained from the Ensembl database (Version 90, August 2017) using the Ensembl Perl API (Version 90). These sequences were then used to build a *Bowtie2* index of contaminant sequences. Adapter sequences and low-quality 5' ending sequences were removed from raw sequencing reads using the *Trimomatic* software (Version 0.36). The impact of quality filtering was assessed using the *FastQC* software. Following adapter removal, sequence reads were aligned to the index of known human rRNAs and tRNAs using *Bowtie2* with its local alignment option. Reads that mapped to the index were removed, and those that did not were output to a FASTQ file for alignment to the reference genome. Filtered reads were aligned to the reference transcriptome/genome using the latest version of *HISAT2* splice-aware sequence aligner (Version 2.1.0). For each sample, the quality of reference alignments was evaluated using the *RSeQC* software (Version 2.6.4).

**Gene Expression Quantification and Normalization** Gene expression quality were summarized in tabular form, univariate boxplots, and multivariate starplots. Quantification was carried out on the gene level using the *featureCounts* function of the *Subread* software package (Version 1.5.3). Reads that overlapped with multiple genes or mapped to multiple locations on the reference genome were excluded. Known ribosomal, transfer, and mitochondrial RNA genes were removed from the final read count analysis dataset ([Supplementary Table 26](#)). Systematic sample differences in sequencing coverage were corrected for by calculating scaling factors for each sample using the trimmed mean of M-values (TMM) method as implemented in the R package *edgeR* (Version 3.18.1). TMM-normalized  $\log_2$  counts per million (LCPM) for each gene were calculated using *edgeR*. A TMM-scaled count of 0.5 reads was added to each gene to avoid taking the  $\log_2$  of zero. LCPM distributions were visualized using univariate boxplots and cumulative distribution function (CDF) plots before and after TMM-normalization.

**Global Outlier and Batch Effect Detection** TMM-normalized LCPM were standardized (z-score: mean=0, variance=1) and LCPM distributions across samples were inspected for outliers (potential sample mislabeling, experimental error, etc.) and systematic effects (sample ordering, batch processing, etc.) using correlation heatmaps, principal component analysis, multidimensional scaling, and hierarchical clustering.

**Determination of Cut Offs for Filtering Lowly Expressed Genes** To determine a suitable cutoff value for filtering lowly expressed genes, reverse cumulative distribution (RCDF) plots summarizing the percentage of genes that exceeded a certain average LCPM cutoff were plotted on the y-axis. The pre-specified cutoff of 1 LCPM (2 counts per million on the original scale) retained 12,596 genes, which was in the targeted range of 10,000 and 14,000 genes ([Supplementary Table 30](#), [Supplementary Figure 13](#)). Genes that passed this cutoff were used as input for all downstream analyses.

### 2.3.2 RNA-Seq Data Analysis

**Identification of Differentially Expressed Genes** Negative binomial generalized linear models as implemented in *edgeR* were applied to identify DE genes after exclusion of outlying samples and lowly expressed genes. TMM-adjusted total read counts per sample were included in the models as an offset to account for systematic sample differences. For each post-first vaccination day (Day 14 and Day 28 post-second vaccination), a negative binomial model was fit to pre- and post-first vaccination read counts across subjects. The subject effects for estimating subject-specific pre-first vaccination levels were added to account for paired samples from the same subject. Effects were parameterized in the design matrix using dummy variables with one variable for each subject and an additional variable for the pre- vs. post-first vaccination effect. For vaccination effects, the value of the dummy variable was set to 1 for post-second vaccination (Day 14 or Day 28 post-second vaccination) and 0 for pre-first vaccination (Day 0) observations. For each gene, the statistical significance of the post- vs. pre-vaccination effect was evaluated using a likelihood ratio testing the following hypothesis on the  $\log_2$  scale:

$$\mathbf{H}_0 : \mu_{\text{post-vaccination}} - \mu_{\text{pre-vaccination}} = \mathbf{0}, \quad \mathbf{H}_1 : \mu_{\text{post-vaccination}} - \mu_{\text{pre-vaccination}} \neq \mathbf{0}$$

To control for testing multiple genes, the false-discovery rate (FDR) based on the Benjamini-Hochberg procedure as implemented in the *p.adjust* R function was applied for each model. Genes with an absolute fold change (effect size) of  $\geq 1.2$  compared to pre-first vaccination and FDR-adjusted p-value  $< 0.05$  were considered to be significantly differentially expressed (DE). Treatment effects in terms of overall fold changes and FDR-adjusted p-values were summarized for all genes that passed the low expression cut off using MA plots and Volcano plots. The fold change cutoff of 1.2 was selected based on RCDF plots summarizing the percentage of DE genes that exceeded a certain fold change cut off ([Supplementary Figure 14](#)). Overlap in DE genes between post-vaccination days was summarized using Venn diagrams, both in terms of overall numbers and separately for up/down-regulated DE genes.

**Heatmap Analysis** Per-subject baseline  $\log_2$  fold change patterns for DE genes were visualized for each post-vaccination day (Day 14 and Day 28 post-second vaccination) using heatmaps. Genes identified as DE for any post vaccination day (Day 14 or Day 28 post-second vaccination) were included as part of this analysis. Heatmap subject and gene dendrograms were based on uncentered Pearson correlation distance and complete linkage hierarchical clustering.

**2.3.2.1 Gene Clustering Analysis** Unsupervised multiscale bootstrapping as implemented in the *pvcust* R package (Version 2.0.0) was carried out to identify robust clusters of genes with correlated  $\log_2$  fold change responses across Day 14 and Day 28 post-second vaccination. Bootstrap resampling was based on uncentered Pearson correlation distances between  $\log_2$  fold change responses. The input list of genes for this analysis included genes identified as DE for any post-vaccination day (Day 14 or Day 28 post-second vaccination). Clusters were obtained using the hierarchical complete linkage clustering

algorithm. To evaluate robustness of gene clusters, multiscale bootstrapping as implemented in the *pv-clust* R package (Version 2.0.0) was carried out separately for each post-vaccination day using varying dataset sizes (0.6\*N, 0.7\*N, 0.8\*N, 0.9\*N, 1\*N, 1.1\*N, 1.2\*N, 1.3\*N, 1.4\*N; where N stands for the respective dataset size). For each dataset size bin, 1,000 bootstrap samples were obtained, and ordinary and multiscale bootstrap probabilities were calculated. Clusters with a multiscale bootstrap probability  $\geq 0.95$  and maximum distance between cluster members of 0.5 (equivalent to minimum uncentered Pearson correlation of 0.5 among all members) were considered robust gene clusters.

**Pathway Enrichment Analysis** Pathway enrichment analysis was carried out separately for each identified DE gene set (Day 14 or Day 28 post-second vaccination vs. Day 0) using published gene set information obtained from the KEGG pathway database (Version 83.0, 09/26/2017), MSigDB (Version 6.1: Reactome Pathways and Immunologic Signatures, GO Biological Processes, GO Molecular Functions, and GO Cellular Components) ([Supplementary Table 27](#)). The analysis was conducted using the *goseq* R package (Version 1.28.0) which adjusts for gene length bias when modeling the null distribution. To compensate for testing multiple gene sets, for each of the 6 gene set and post-vaccination day combinations, p-values were adjusted using the Benjamani-Hochberg procedure to control the FDR. Gene sets with an FDR-adjusted p-value  $< 0.05$  were considered to be significantly enriched. For significantly enriched KEGG pathways, color-coded KEGG pathway maps were generated (KEGG KGML pathway layout information Version 86.0, 04/01/2018).

**Identification of Transcriptomics Responses That Best Predict Protective Antibody Response** Regularized linear regression models were fit to determine gene expression  $\log_2$  fold change responses that best predicted peak changes in protective levels of antibodies (based on inverse Caspase-3 levels) using the *glmnet* R package (Version 2.0-13). Separate models were fit for each post vaccination day (Day 14 and Day 28 post-second vaccination). To avoid overfitting, and to facilitate variable selection, an elastic net regularization step (combination of L1 Lasso and L2 ridge penalties) was applied. Leave-one-out cross validation was used to determine the optimum regularization parameters that minimized the model mean squared error. The input gene set included genes with an absolute mean baseline fold change in LCPM of  $\geq 1.5$  at Day 14 or Day 28 post-second vaccination. Prior to modeling, gene variable  $\log_2$  fold changes were standardized (z-score: mean=0, variance=1) using the *glmnet* standardize=TRUE option. Genes selected by each model were further characterized using pathway enrichment analysis as described in the previous method section.

**Identification of Transcriptomics Responses That Best Correlate With Changes in Proliferating and Cytokine Producing T-cells or Cytokine Responses** Regularized canonical correlation analysis (RCCA) as implemented in the *mixOmics* R package (Version 6.1.3) was applied to maximize the inter-set correlation between transcriptomic  $\log_2$  fold change gene responses and PCTC or cytokine fold change re-

sponses for the respective post-vaccination day. RCCA was performed for each post-vaccination day (Day 14 and Day 28 post-second vaccination) and assay (PCTC and cytokine measurements). Prior to modeling, PCTC and cytokine fold change variables were  $\log_2$  transformed and then standardized (z-score: mean=0, variance=1). A regularization step was included to avoid overfitting and to handle collinearity within variable sets. Regularization parameters ( $\lambda_1$  and  $\lambda_2$ ) were estimated using leave-one-out cross validation (grid-search of 250,000 parameter combinations ranging from 0.000001 to 1 in 500 increments). Correlations between original variables (Pearson correlation) and corresponding canonical variates were calculated (canonical loadings). Canonical loadings were squared to obtain the percent-explained variance for each variable. Tabular and graphical summaries were presented if the model achieved a cross validation score (CV) of  $\geq 0.5$ .

Canonical loadings for each variable set were visualized for the first two canonical variates using 2-dimensional canonical correlation circle plots. Gene and T-cell or cytokine variables for which the first two canonical variates explained less than 25% of their total variance (placed within the inner circle of the correlation circle plots) were grayed out. Variables or groups of variables that are closely positioned in these plots are positively correlated while those diametrically opposed are negatively correlated. The strength of the correlation is encoded by the distance from the center of the circle as well as by the angle between variables when viewed as vectors originating from the center. A sharp angle between variables represents a positive correlation, an obtuse angle indicates a negative correlation while a right angle is observed for zero correlation. Thus, maximum correlation is achieved when variables are closely placed together to the outer circle (or directly opposed on the outer circle). KEGG BRITE pathway hierarchy (second level) information for the top five pathway categories (in terms of number of genes that were correlated) was overlaid on top of the correlation circle plots to highlight known functional organization. Identified robust gene clusters were integrated by drawing lines between correlated genes that formed a robust gene cluster.

Genes that showed a correlation of  $r > 0.5$  with the respective first canonical variate were further characterized using pathway enrichment analysis as described in the pathway enrichment method section.

## 2.4 Software

Data was analyzed using the *R statistical programming language* and *R Bioconductor* packages. A complete listing of R package versions are given in [Supplementary Table 32](#). This report was generated using the *knitr* R package (Version 1.17) and  $\text{\LaTeX}$  typesetting software (Version TeX Live 2012/Debian). The operating system used was *Ubuntu* (Version 16.04.2 LTS).

### 3 Supplemental Results

#### 3.1 Antibody, T-cell, and Cytokine Results

Summary statistics for the protective function of antibodies against anti-V-antigen (inverse of normalized caspase-3 levels) pre-vaccination (Day 0), for each post-vaccination day (Day 14 and Day 28 post-second vaccination), and treatment group (Flagellin/F1/V 6mcg, Flagellin/F1/V 10mcg) as well as combined treatment groups are tabulated in [Supplementary Table 5](#). Statistically significant Wilcoxon Signed-Rank test results to assess change for each post-vaccination day compared to pre-vaccination measurements are described in [Supplementary Table 8](#) for proliferating and cytokine-producing T cells and for cytokines.

**Correlation Between Protective Antibody Response and ELISA Results** [Supplementary Table 7](#) lists Spearman correlation results to assess correlation between  $\log_2$  fold change in protective levels of antibody based on inverse normalized caspase-3 levels and change in IgG ELISA titer as well as IgG ELISA concentration against the F1 and V antigens (this data was obtained for the parent study: DMID 08-0006). Corresponding scatterplots with trend lines are shown in [Supplementary Figures 2 and 3](#)

**Correlation Between Protective Antibody Response and Proliferating and IL-6 and IFN- $\gamma$  Producing CD4+ T Cells** [Supplementary Table 9](#) lists Spearman correlation results to assess correlation between  $\log_2$  fold changes in protective levels of antibody based on inverse normalized caspase-3 levels and change in T-cell stimulation index for CD4+/CFSElo/IL-6+ T-cells and CD4+/CFSElo/IFN $\gamma$ + T-cells following F1/V stimulation. Corresponding scatterplots with trend lines are shown in [Supplementary Figures 4 and 5](#)

#### 3.2 Transcriptomics results

**RNA-Seq Reference Alignment Statistics** On average, 35 million individual reads were mapped for each sample against the reference genome sequence, of which 79% uniquely mapped to a location on the human reference assembly ([Supplementary Table 28](#)). When reads were mapped against known gene models, on average, 20 million reads were uniquely counted in the expression quantification step. The vast majority (on average 81%) of tags (spliced reads) mapped to known<sup>1</sup> exonic regions followed by intronic (17%), and intergenic regions (1%) ([Supplementary Table 29](#)).

**Impact of TMM Normalization** The impact of between-sample normalization using the trimmed mean of M-values (TMM) method is visualized in [Supplementary Figures 6 to 8](#). The plots summarize  $\log_2$  counts per million (LCPM) distributions for each sample before and after normalization. The medians and interquartile ranges of LCPM distributions were very similar for most of the 35 samples before and after normalization.

<sup>1</sup>Ensembl gene models (Version 90, August 2017)



**Global Gene Expression Patterns, Confounding Effects, Outlying Samples** Principal component analysis (PCA), non-metric multidimensional scaling, hierarchical clustering, and heatmap results based on LCPM gene variables are shown in [Supplementary Figures 9 to 12](#). Sample SAM01 showed an outlying profile in the PCA analysis ([Supplementary Figure 10](#)). However, as a strong outlying signal was not consistently observed across all methods, it was decided to keep the sample as part of the analysis. No batch effects were observed.

**Identification of Differentially Expressed Genes** MA and Volcano plots are provided in [Supplementary Figure 15](#). Differentially expressed (DE) genes for each post-vaccination day comparison (Day 14 post-second vaccination vs. Day 0 and Day 28 post-second vaccination vs. Day 0) ordered by treatment effect (absolute  $\log_2$  fold change) are listed in [Supplementary Tables 10 and 11](#). Response dynamics and functional context of DE genes over time was evaluated using heatmaps, unsupervised gene clustering, and supervised pathway enrichment analysis.

**Pathways Enriched in DE Genes** Pathway enrichment analysis was carried out by post-vaccination day using published gene sets outlined in [Supplementary Table 27](#). Significantly enriched gene sets for each of the six pathway resources are given in [Supplementary Tables 12 to 23](#). Enriched KEGG pathway maps color-coded by expression fold change and fold change significance are shown in [Supplementary Figures 16 to 35](#). Venn diagrams that summarize the overlap in enriched pathways are provided in [Supplementary Figure 36](#).

**Gene Responses That Best Predict Protective Antibody Response** Regularized linear regression analysis was carried out to identify combinations of gene  $\log_2$  fold changes that were correlated with maximum change in protective antibody responses at Day 14 or Day 28 post-second vaccination. The input set included 62 genes with a minimum average absolute fold change of 1.5 fold. For Day 14 post-second vaccination the best predictive model ( $\alpha=0.19$  and  $\lambda=0.2171$ ) included 16 of these genes, of which 56% were DE expressed from pre-vaccination ([Supplementary Table 31](#)) and 56% are known to play a role in *REGULATION OF CELLULAR PROCESS* (Source: UniProt GO). Annotations and regression coefficients are listed in [Supplementary Table 24](#). Scatterplots that summarize correlations between  $\log_2$  fold changes in gene expression and maximum protective antibody responses for each gene are provided in [Supplementary Figure 37](#).

**Gene Responses That Best Correlate With Changes in Proliferating and Cytokine Producing T Cells or Cytokine Responses** Regularized canonical correlation analysis (RCCA) was performed to identify combinations of gene  $\log_2$  fold changes that were best correlated with the respective Day 14 or Day 28 post-second vaccination T-cell or cytokine responses. The input set included genes with an average absolute fold change of  $\geq 1.5$  at either Day 14 or Day 28 post-second vaccination. Overall, 62 genes met

this cut off. Model performance was summarized in [Supplementary Table 25](#). For T-cells, only the Day 14 post-second vaccination model met the cross validation score (CV) cut off of 0.5. For cytokines, both models (Day 14 and Day 28 post-second vaccination) met the cut off. Regularized canonical correlation analysis (RCCA) was performed to identify combinations of gene  $\log_2$  fold changes that were best correlated with the respective Day 14 or Day 28 post-second vaccination T-cell or cytokine responses. The input set included genes with an average absolute fold change of  $\geq 1.5$  at either Day 14 or Day 28 post-second vaccination. Overall, 62 genes met this cut off. Model performance was summarized in [Supplementary Table 25](#). For T-cells, only the Day 14 post-second vaccination model met the cross validation score (CV) cut off of 0.5. For cytokines, both models (Day 14 and Day 28 post-second vaccination) met the cut off. Correlation circle plots summarizing associations between variable sets based on the first two canonical variates are shown in [Supplementary Figures 38 to 40](#).

## Figures

**Supplementary Figure 1:** Analysis population consort flow diagram.

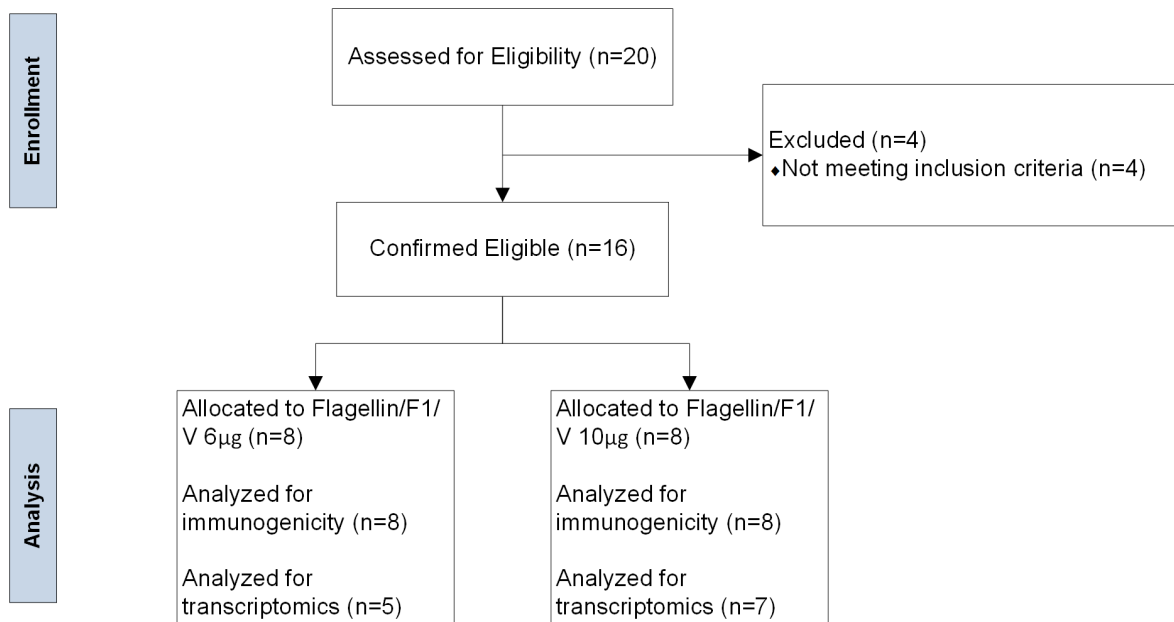

**Supplementary Figure 2:** Scatterplots that summarize the correlation between  $\log_2$  fold change in inverse Caspase-3 levels and  $\log_2$  fold change in ELISA IgG concentration and titer for F1 antigen. The green solid trend line represents a locally weighted regression fit.

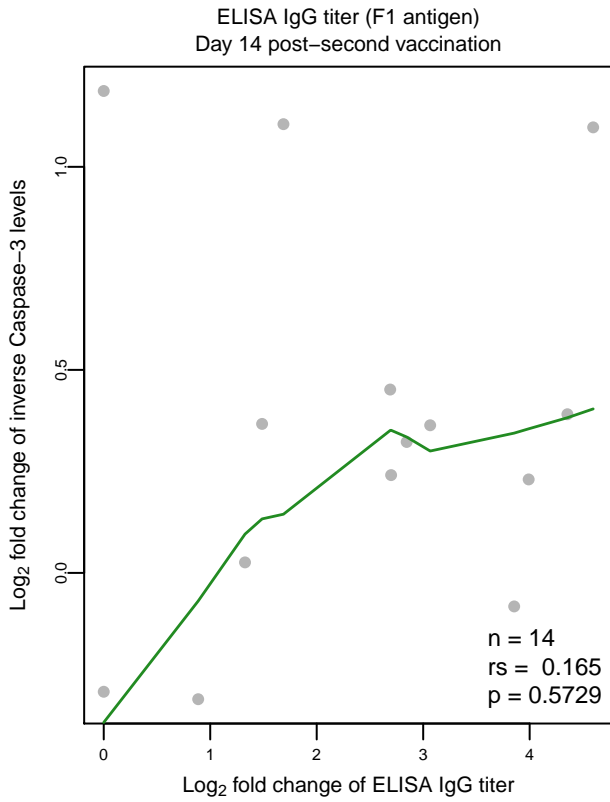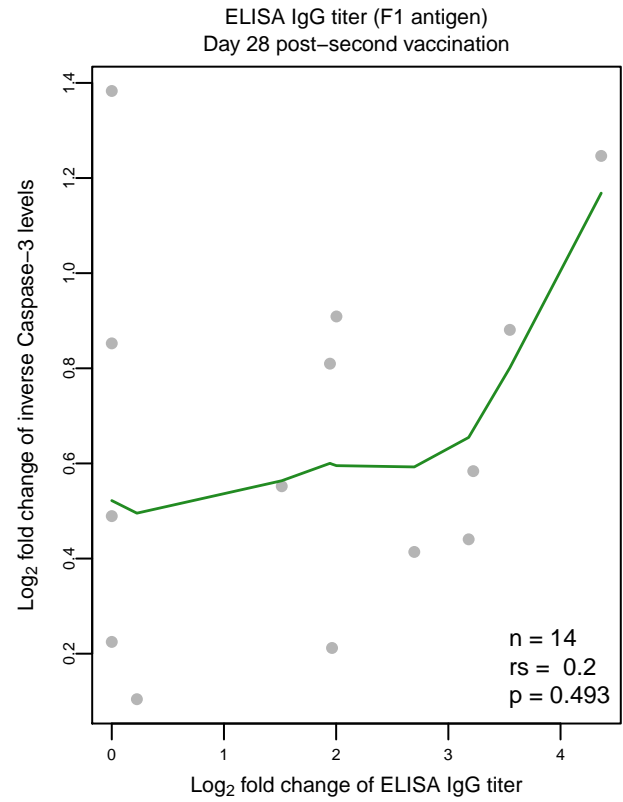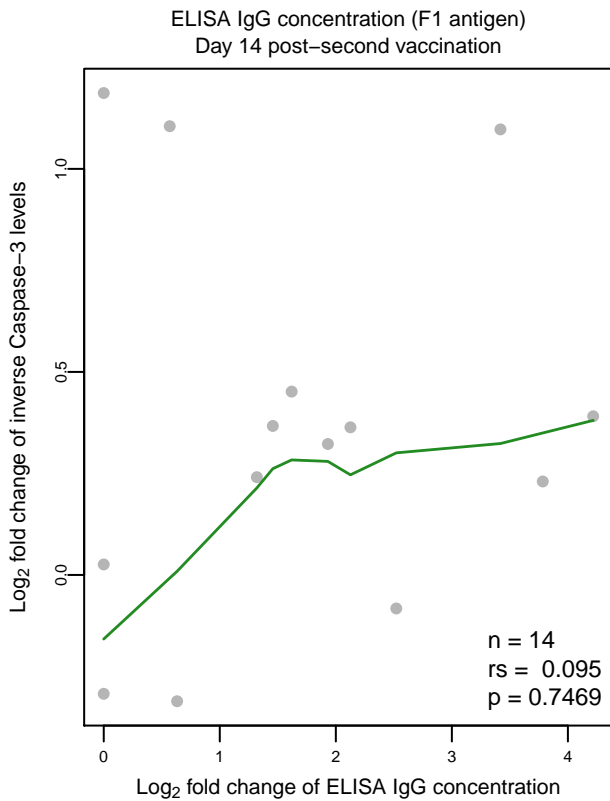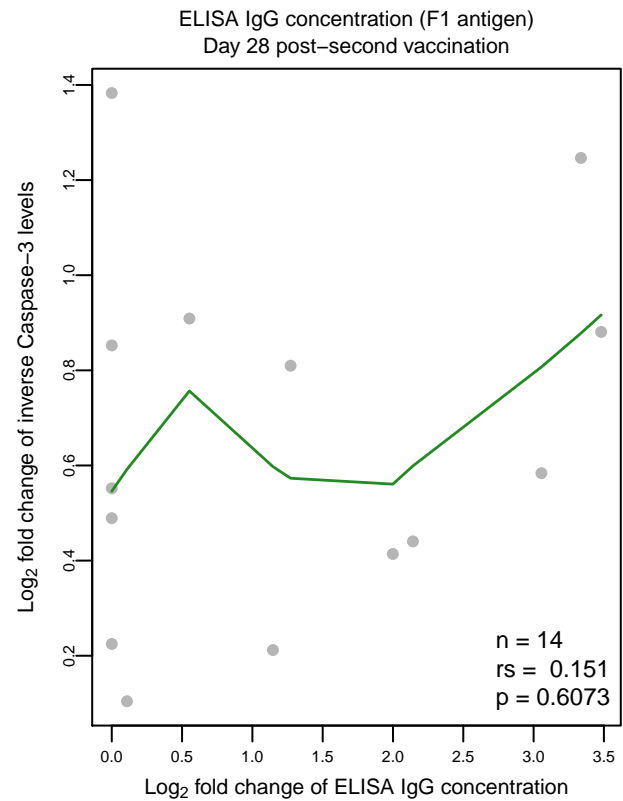

**Supplementary Figure 3:** Scatterplots that summarize the correlation between  $\log_2$  fold change in inverse Caspase-3 levels and  $\log_2$  fold change in ELISA IgG concentration and titer for V antigen. The green solid trend line represents a locally weighted regression fit.

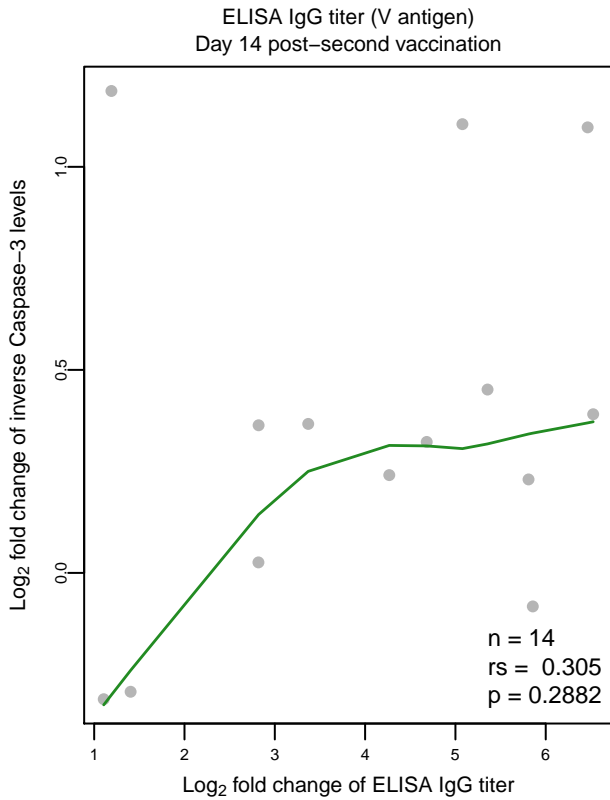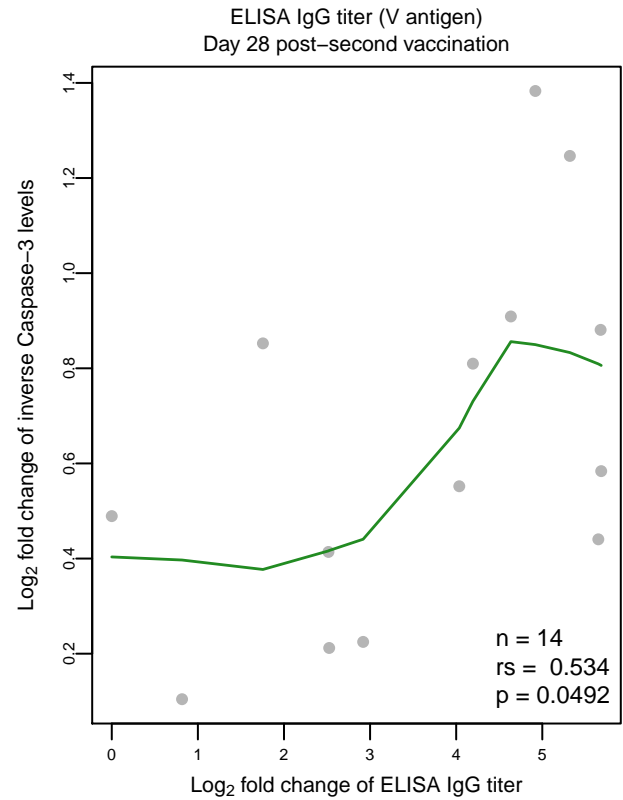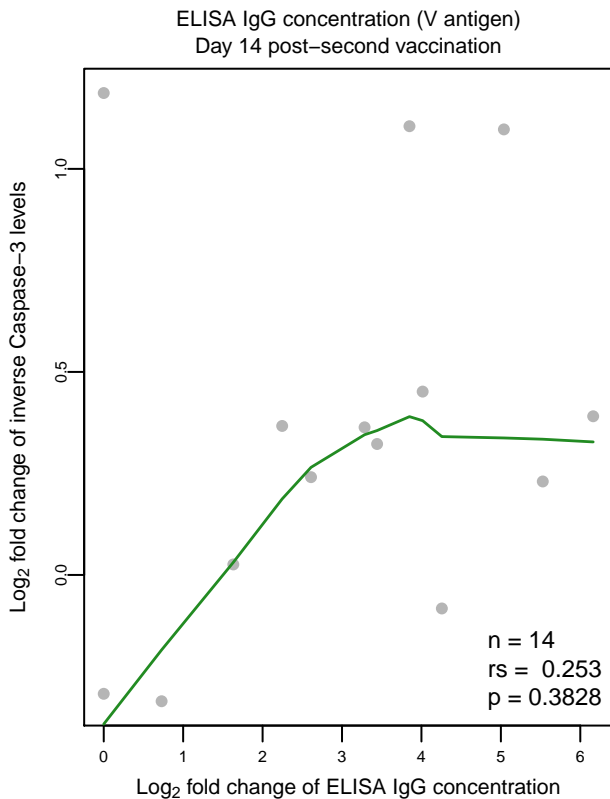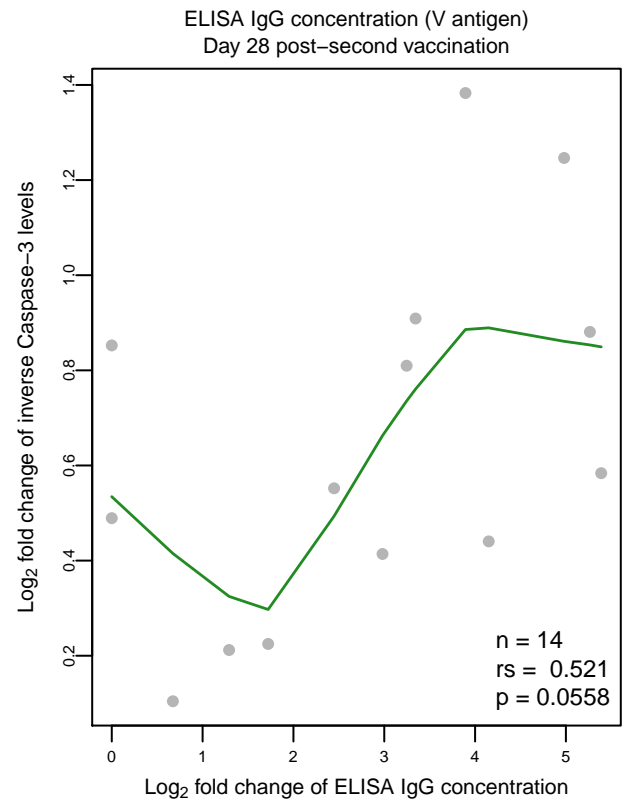

**Supplementary Figure 4:** Scatterplots that summarize the correlation between  $\log_2$  fold change in inverse Caspase-3 levels (y-axis) and  $\log_2$  fold change in the stimulation index of CD4+/CFSElo/IL-6+ T-cells (x-axis) by post-vaccination day. The green solid trend line represents a locally weighted regression fit.

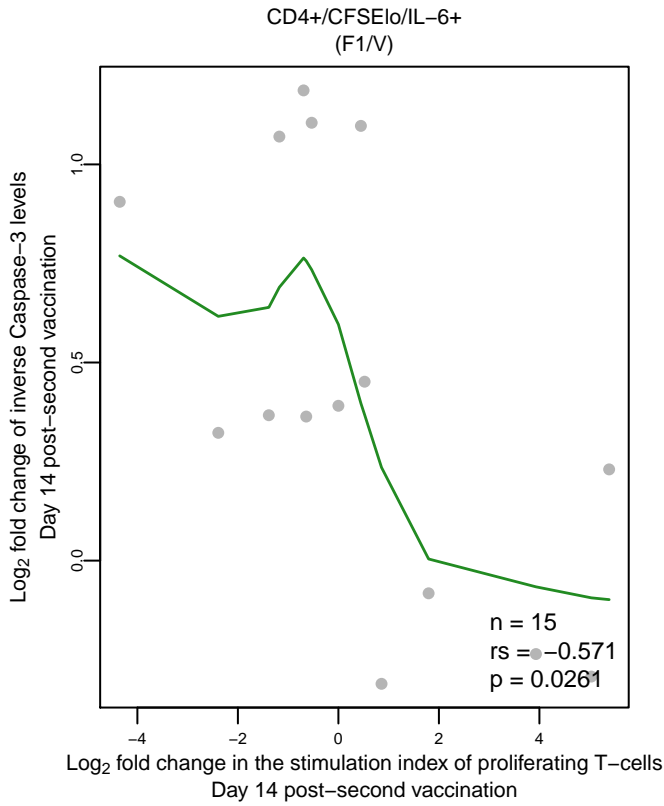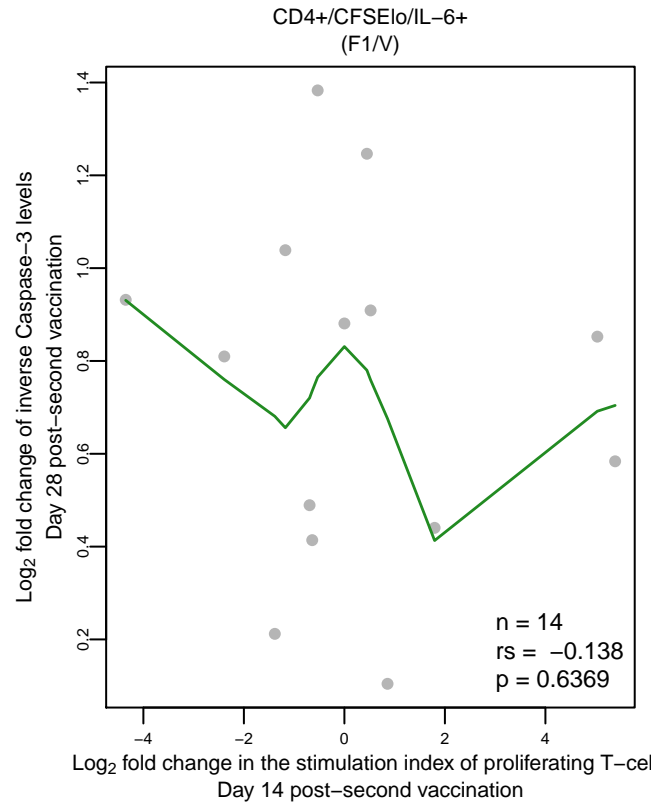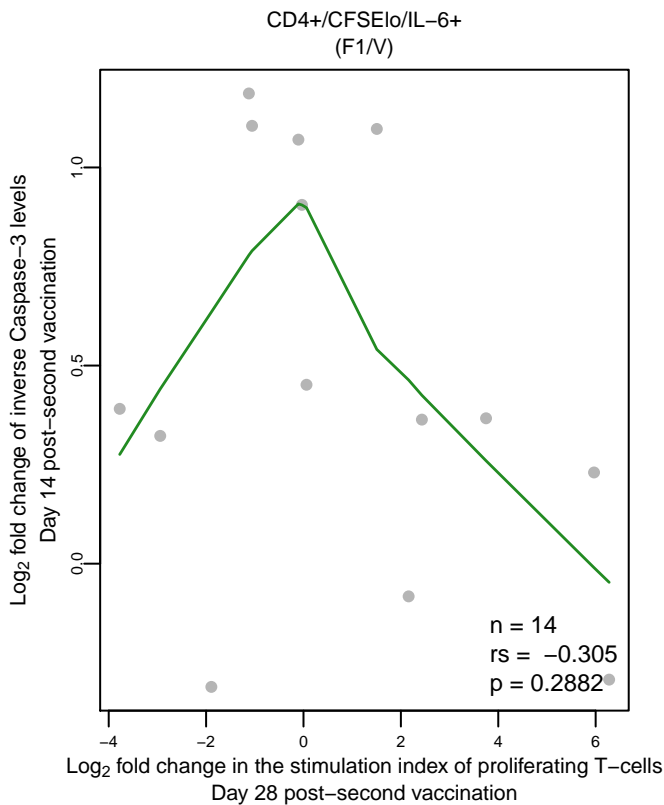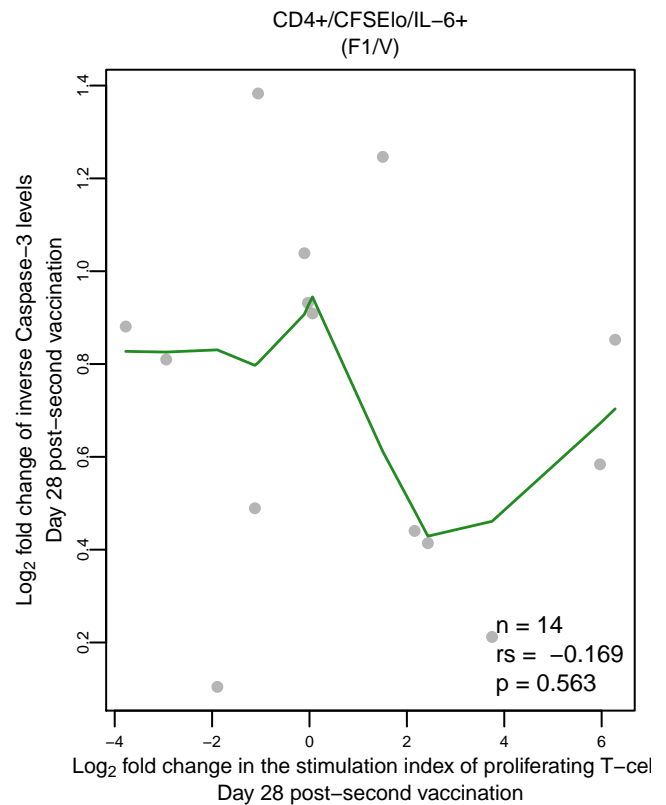

**Supplementary Figure 5:** Scatterplots that summarize the correlation between  $\log_2$  fold change in inverse Caspase-3 levels (y-axis) and  $\log_2$  fold change in the stimulation index of CD4+/CFSElo/IFN $\gamma$ + T-cells (x-axis) by post-vaccination day. The green solid trend line represents a locally weighted regression fit.

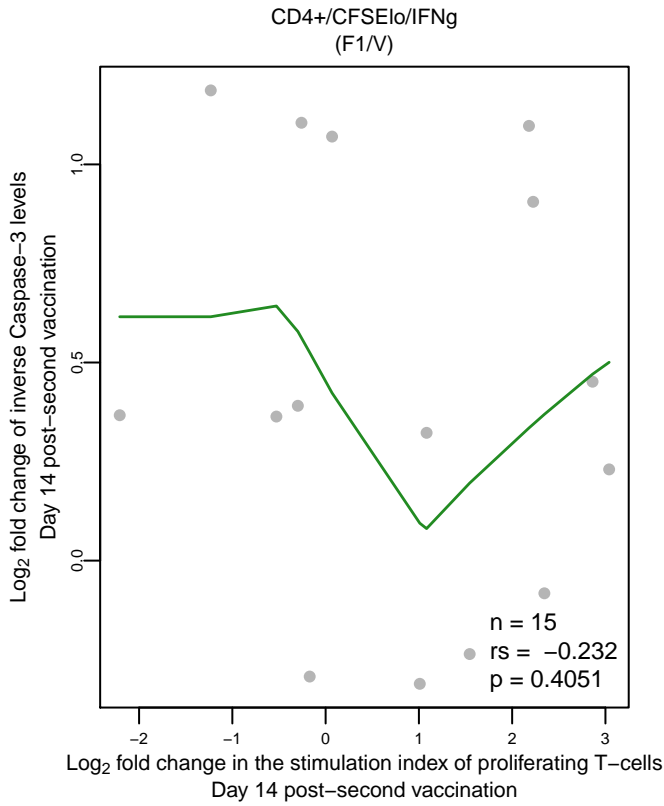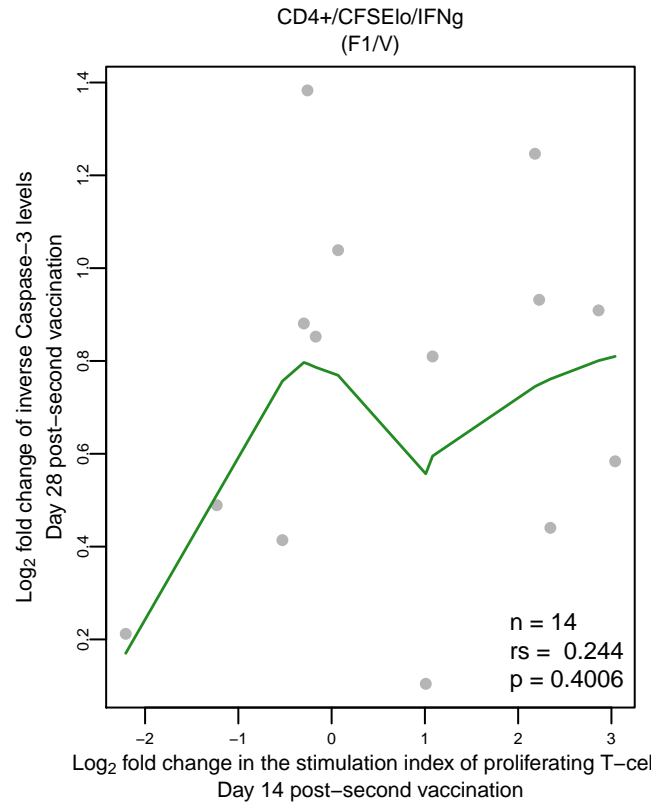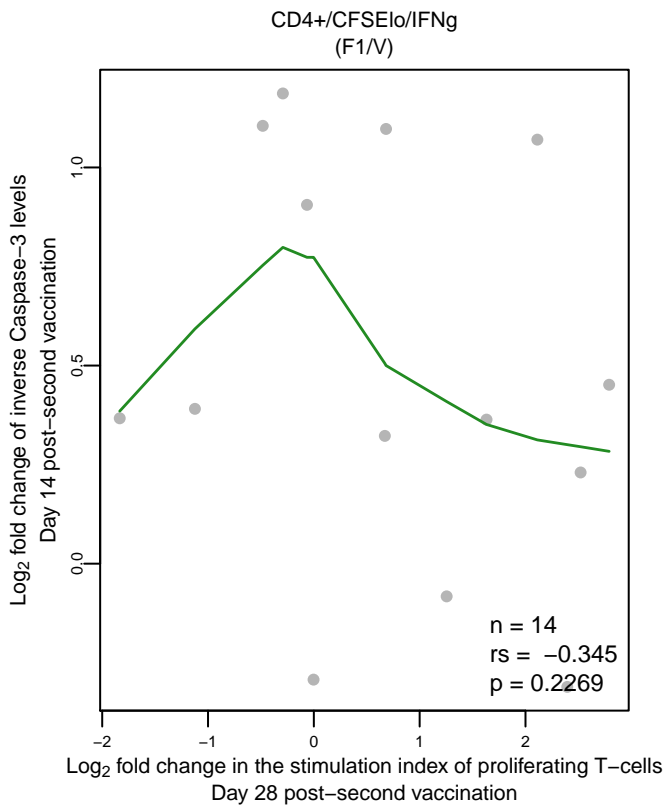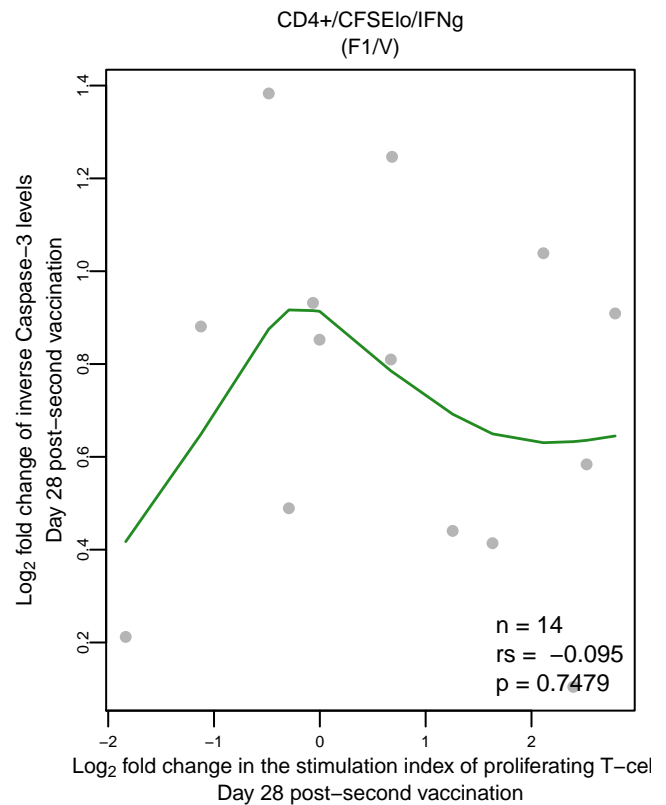

**Supplementary Figure 6:** Boxplots of  $\log_2$  counts per million before TMM normalization (RNA-Seq). Timepoints day 14 and day 28 refer to days 14 and 28 post-second vaccination.

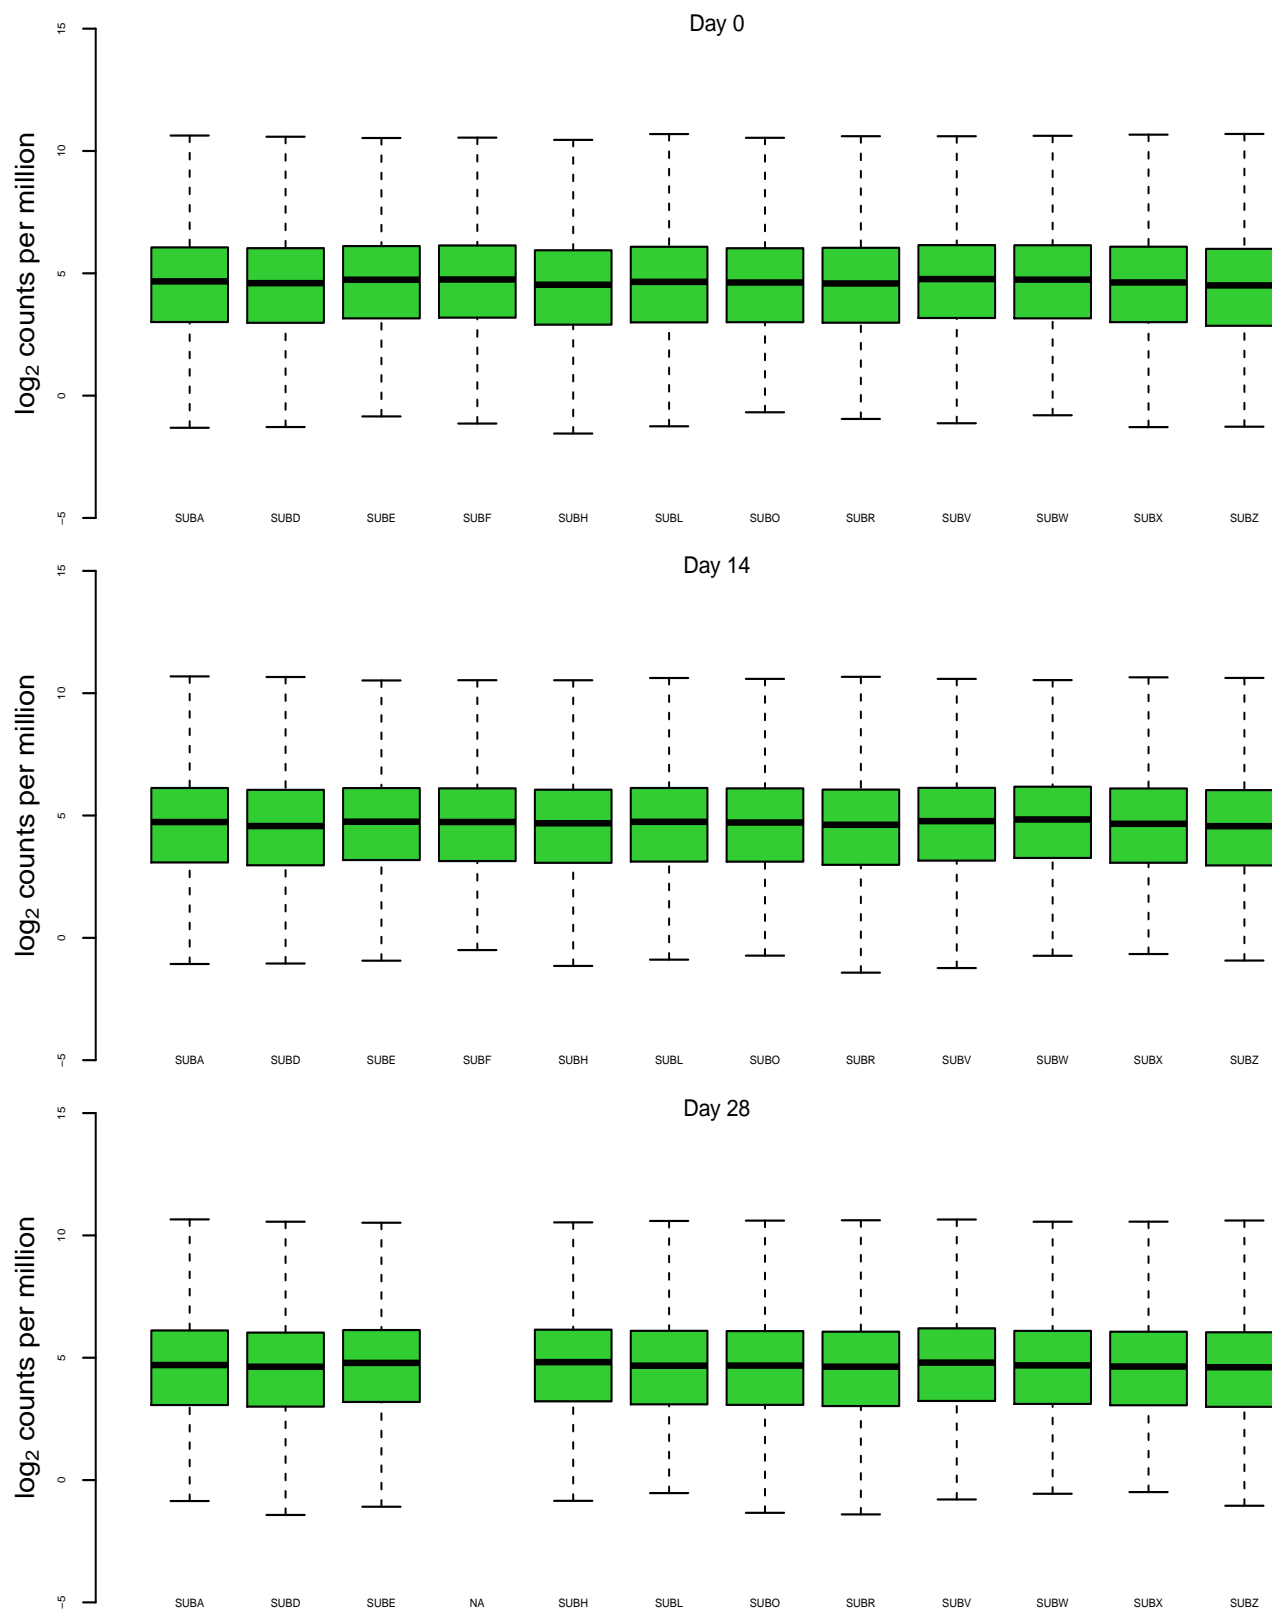



**Supplementary Figure 7:** Boxplots of  $\log_2$  counts per million after TMM normalization (RNA-Seq). Timepoints day 14 and day 28 refer to days 14 and 28 post-second vaccination.

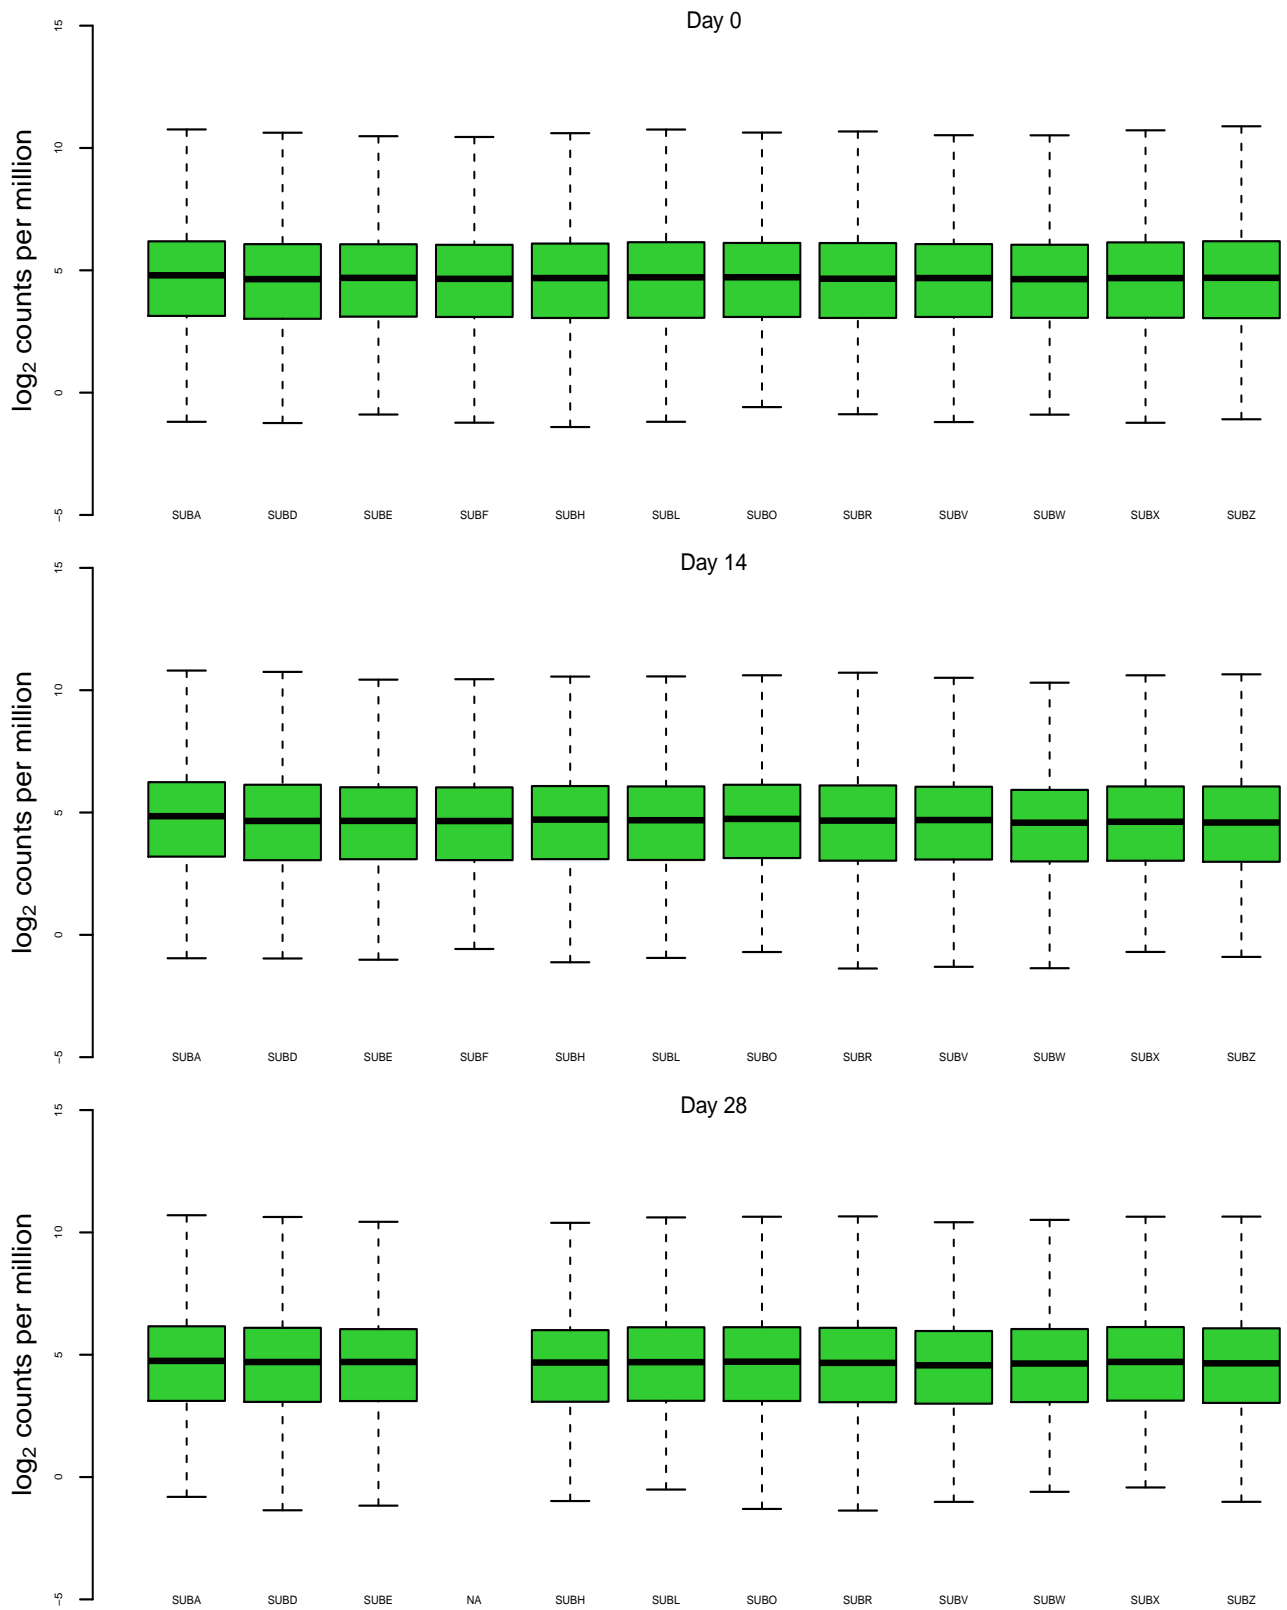

**Supplementary Figure 8:** Empirical cumulative distribution function plots of  $\log_2$  counts per million before and after TMM normalization (RNA-Seq). Timepoints day 14 and day 28 refer to days 14 and 28 post-second vaccination.

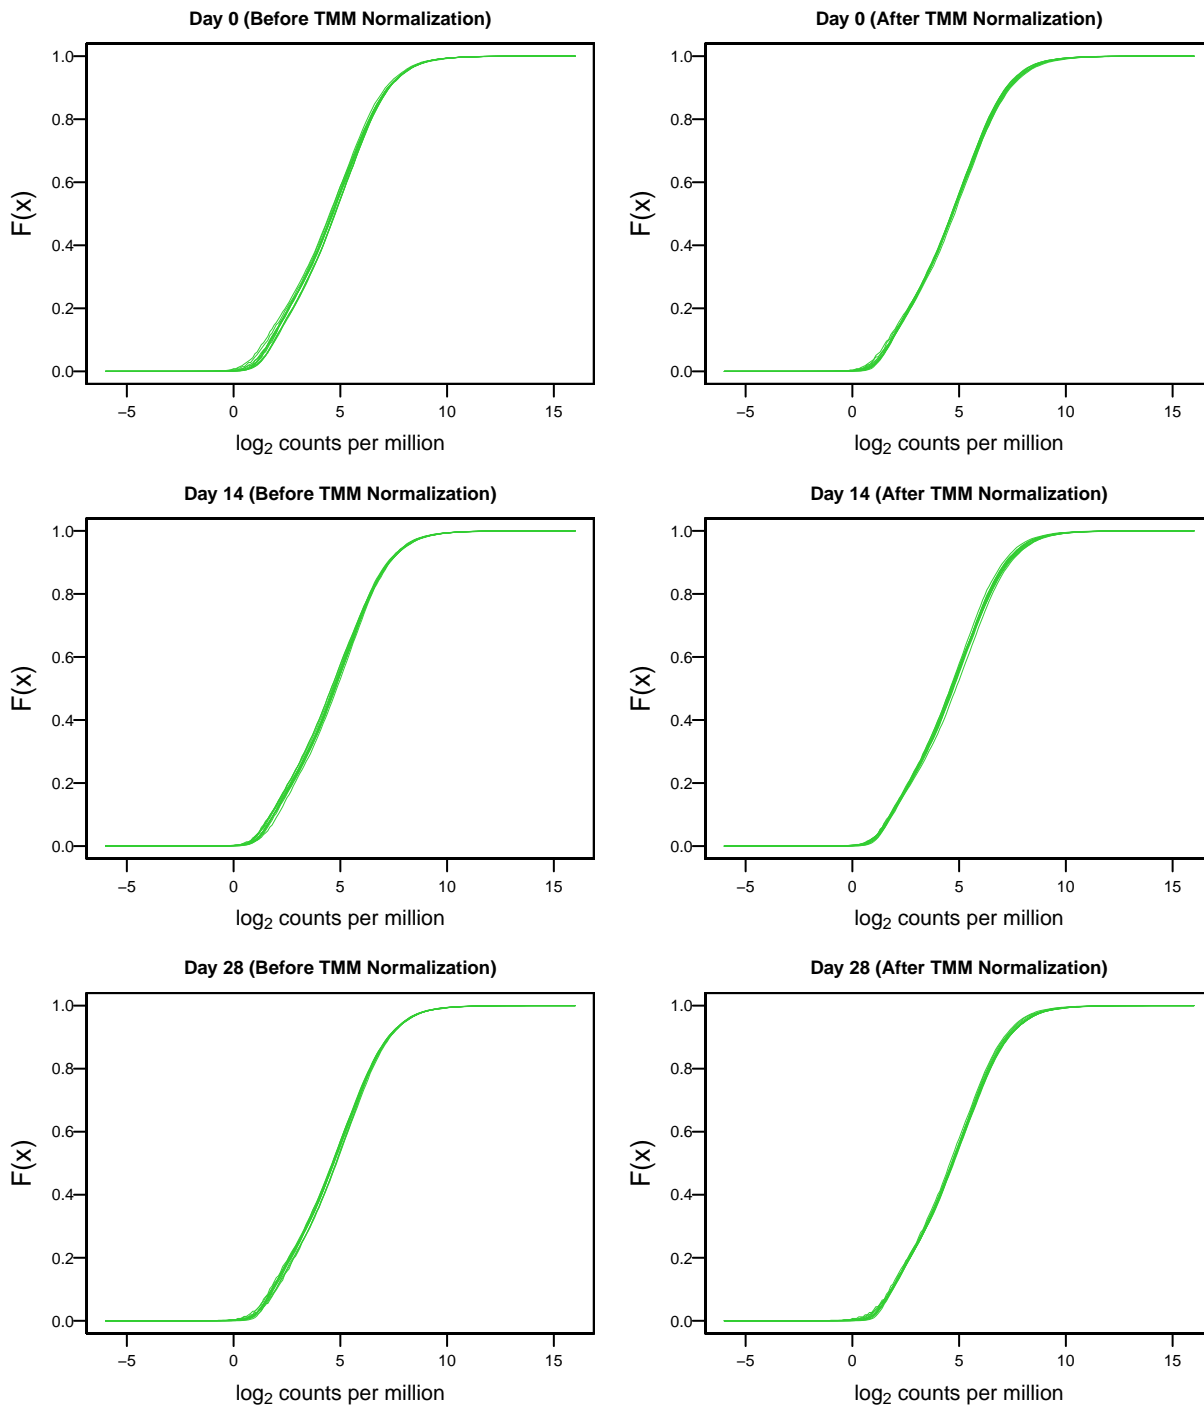

**Supplementary Figure 9:** Spearman correlation heatmap of TMM-normalized log<sub>2</sub> counts per million values (RNA-Seq). Rows and columns both represent samples. Cells colored red have a higher Spearman correlation coefficient than those colored blue.

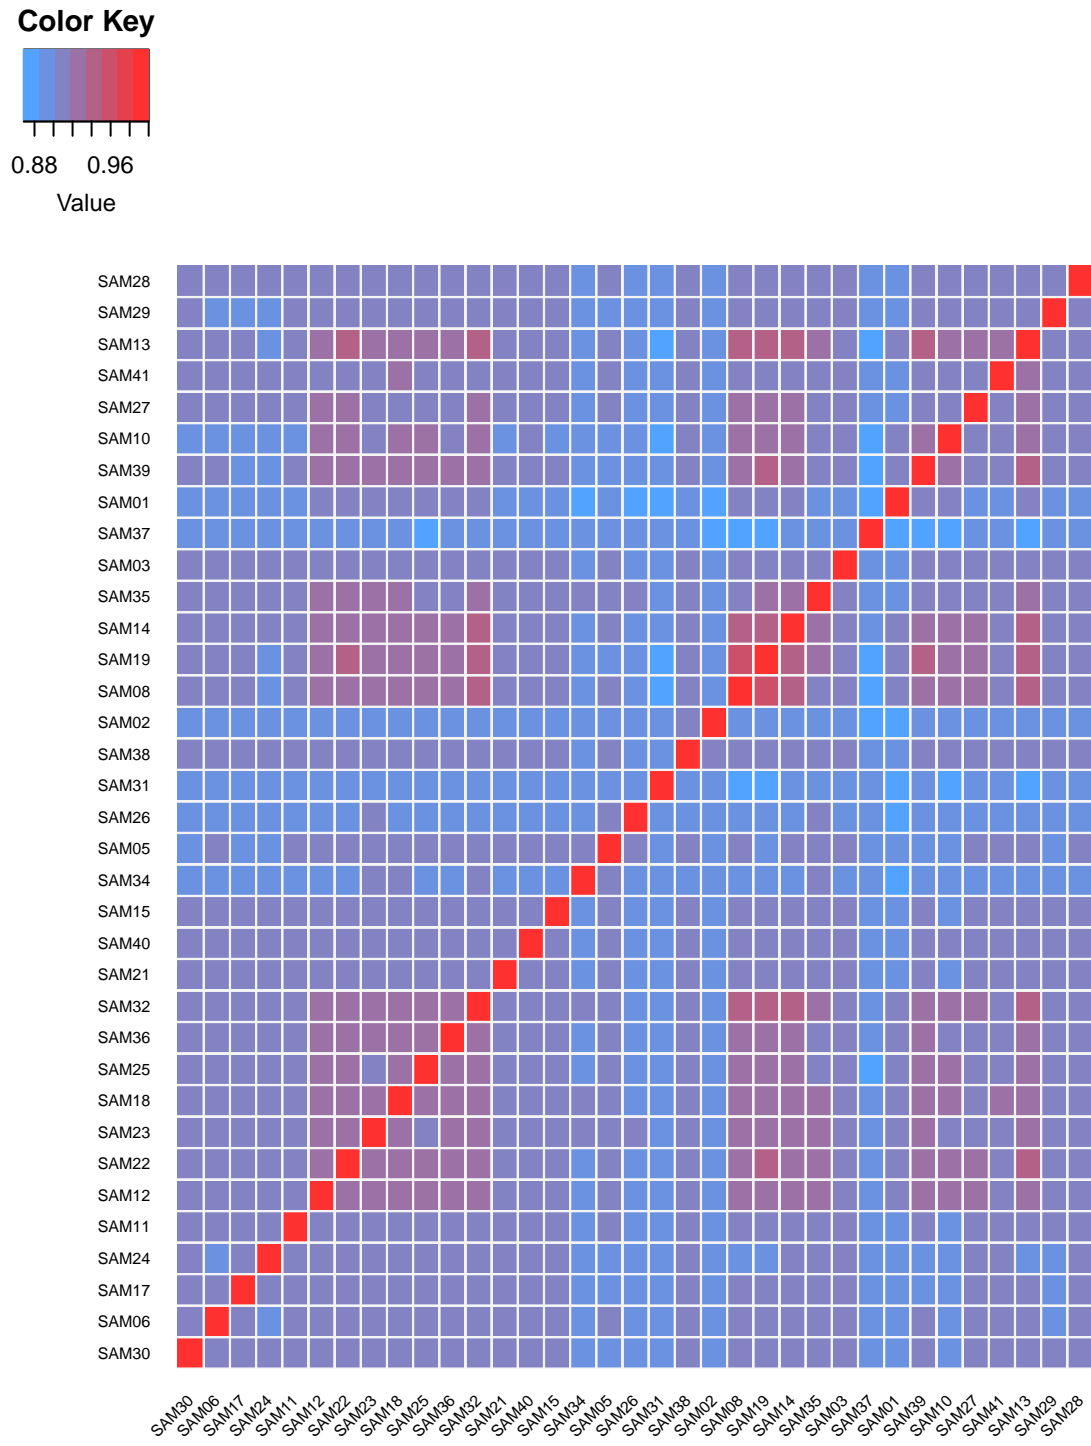

**Supplementary Figure 10:** PCA biplots (RNA-Seq). 95% confidence ellipses are drawn. The right panel is identical to the left panel except that it shows dataset labels for the four most outlying samples based on maximum Mahalanobis distance.

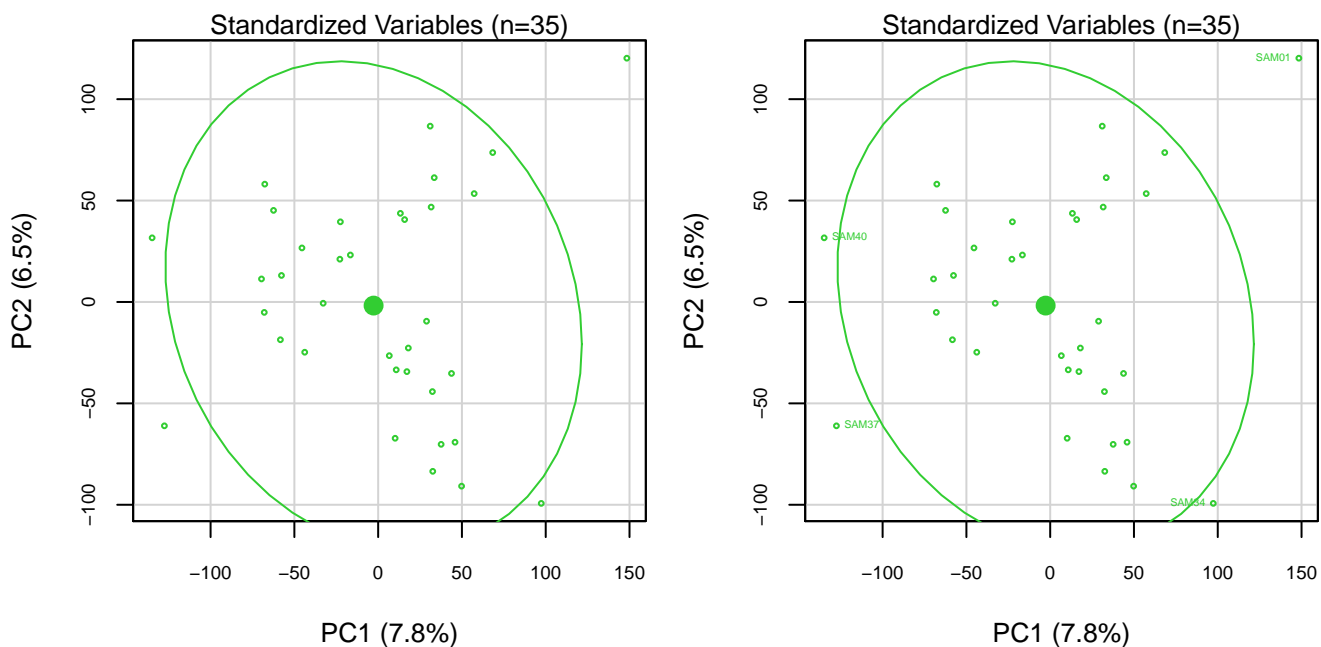

**Supplementary Figure 11:** Non-metric multidimensional scaling biplots (RNA-Seq). For the top panels, Euclidean distance was used to determine pairwise differences. For the bottom panels, 1-Spearman distance was used to determine pairwise differences. The right panels are identical to the left panels except that they show dataset labels for the four most outlying samples based on maximum Mahalanobis distance.

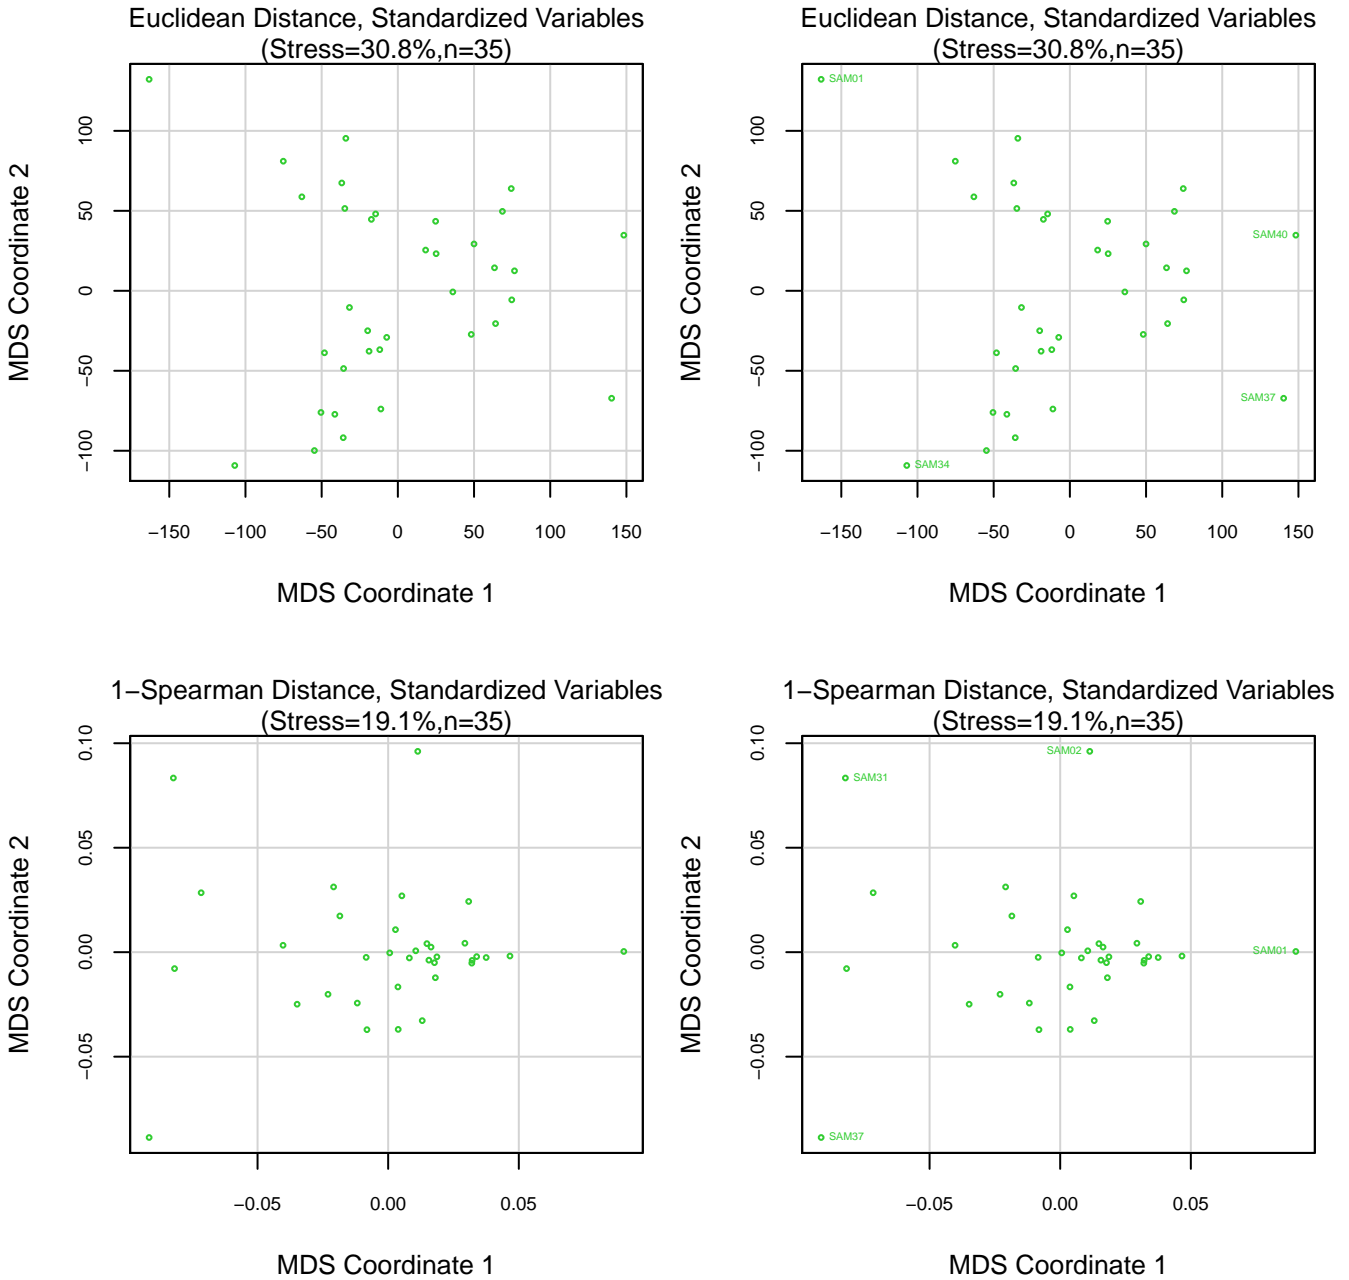

**Supplementary Figure 12:** Hierarchical Clustering Plots (RNA-Seq). Euclidean and 1-Spearman distances are hierarchically clustered using the complete linkage clustering algorithm.

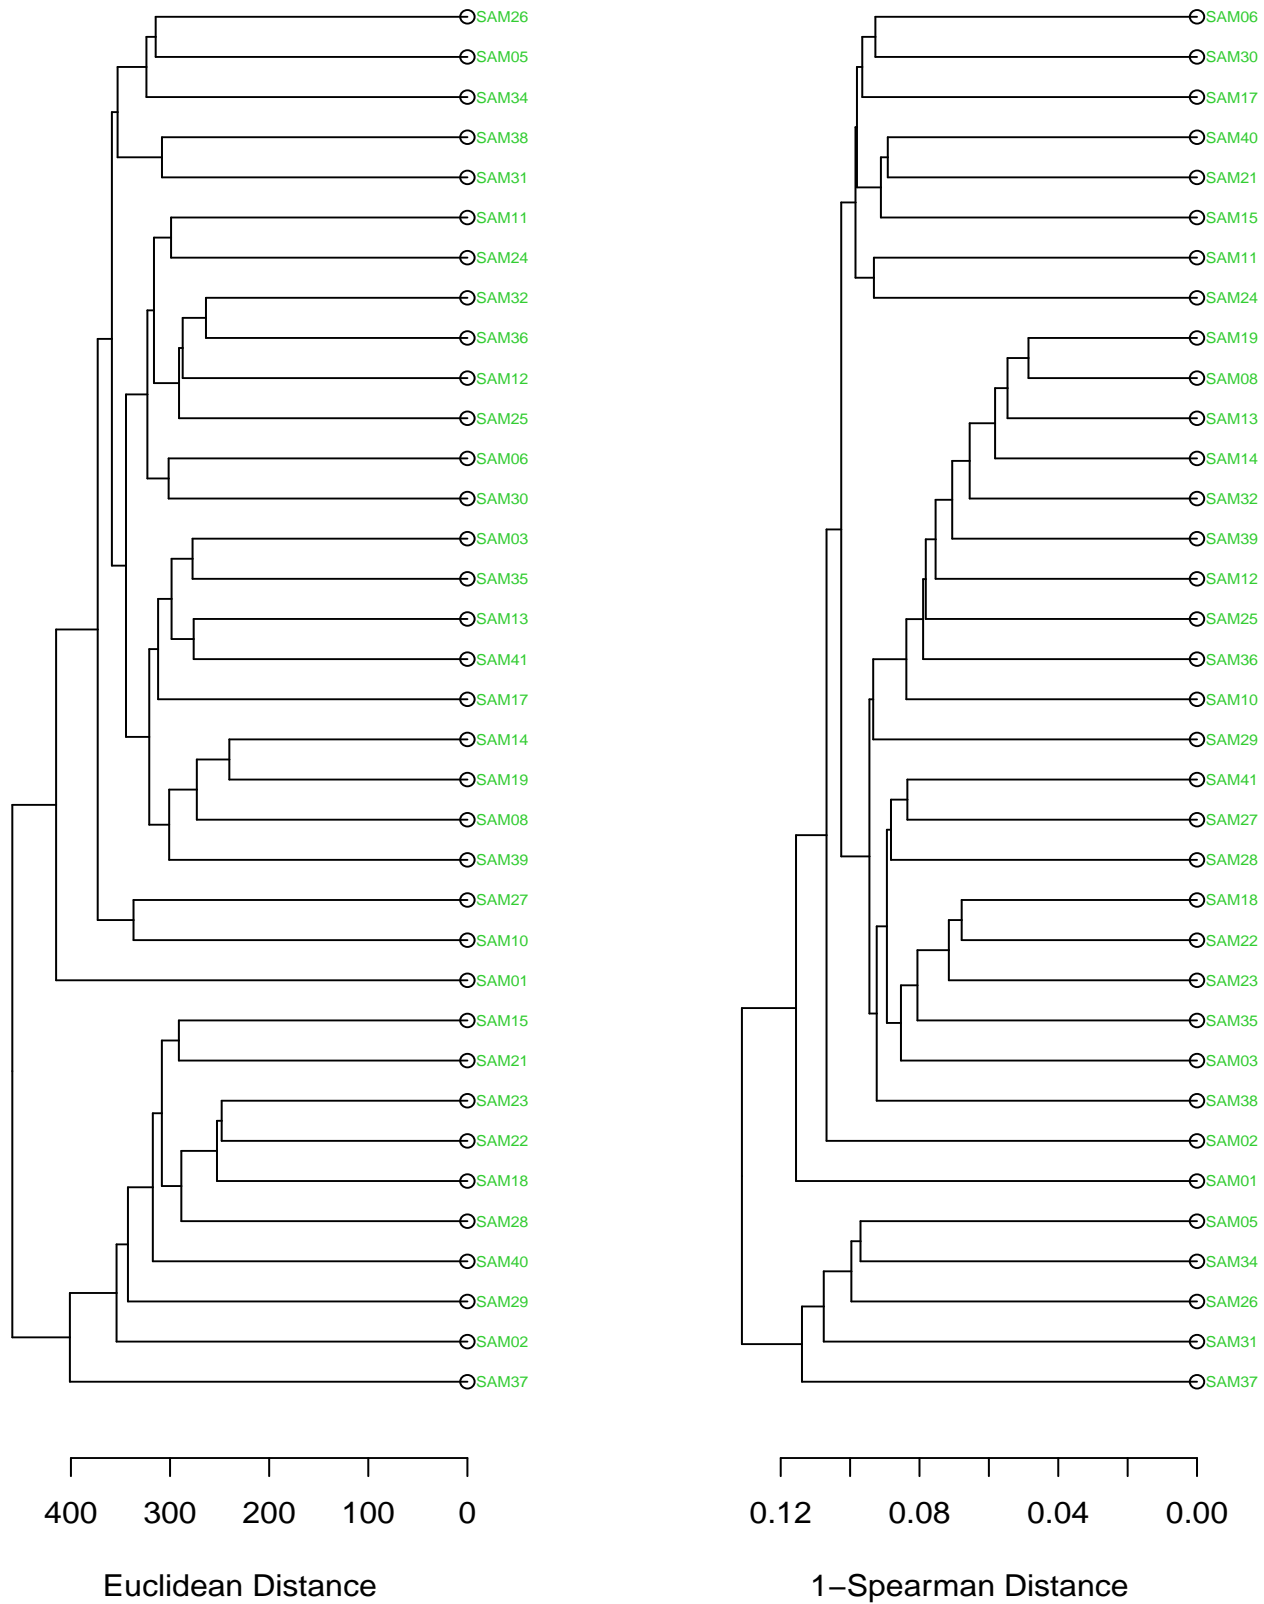

**Supplementary Figure 13:** Reverse empirical cumulative distribution function plots to assess lowly-expressed gene cut offs (RNA-Seq). The x-axis represents the  $\log_2$  count per million cut off for identifying lowly-expressed genes. The y-axis shows the percentage of all genes with an average gene expression level across all study samples that exceeds the respective cut off. The grey box indicates the target range of genes to be selected (between 10,000 and 14,000 genes). The black vertical line represents the low-expression cutoff.

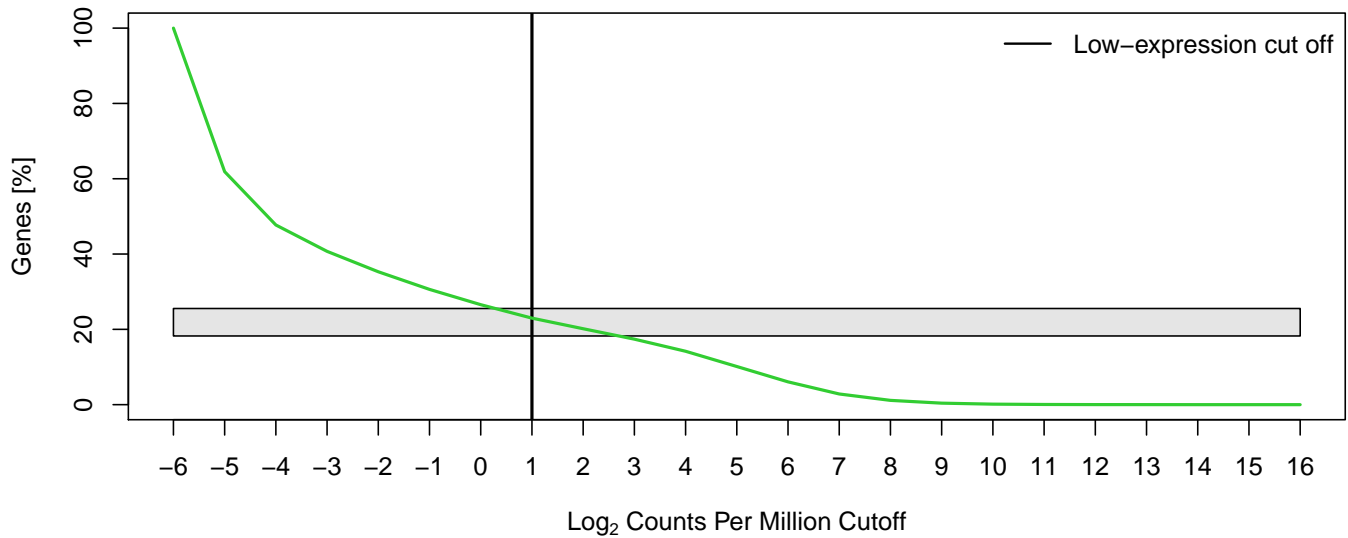

**Supplementary Figure 14:** Reverse empirical cumulative distribution function plots to assess fold change cut offs (RNA-Seq). The x-axis represents the  $\log_2$  fold change cut off for identifying DE genes. The y-axis shows the percentage of genes that meet the FDR-adjusted p-value cut off whose average fold change exceeds the respective cut off. The grey and black vertical lines represent the default (1.5 FC) and the actual (1.2 FC) cutoffs, respectively.

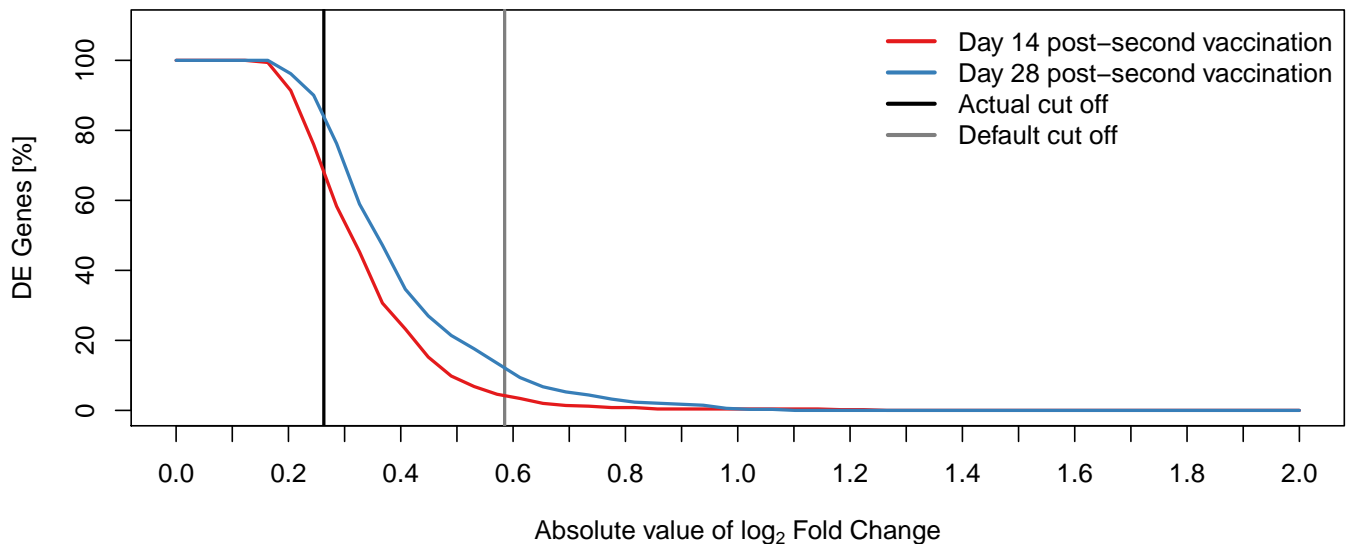

**Supplementary Figure 15:** Volcano and MA plots by timepoint (RNA-Seq). Blue lines indicate the pre-specified minimum fold change cut off. In red: significant genes; in grey: genes that did not pass the fold change cut offs; in black: genes that passed the fold change cut off but were not significant.

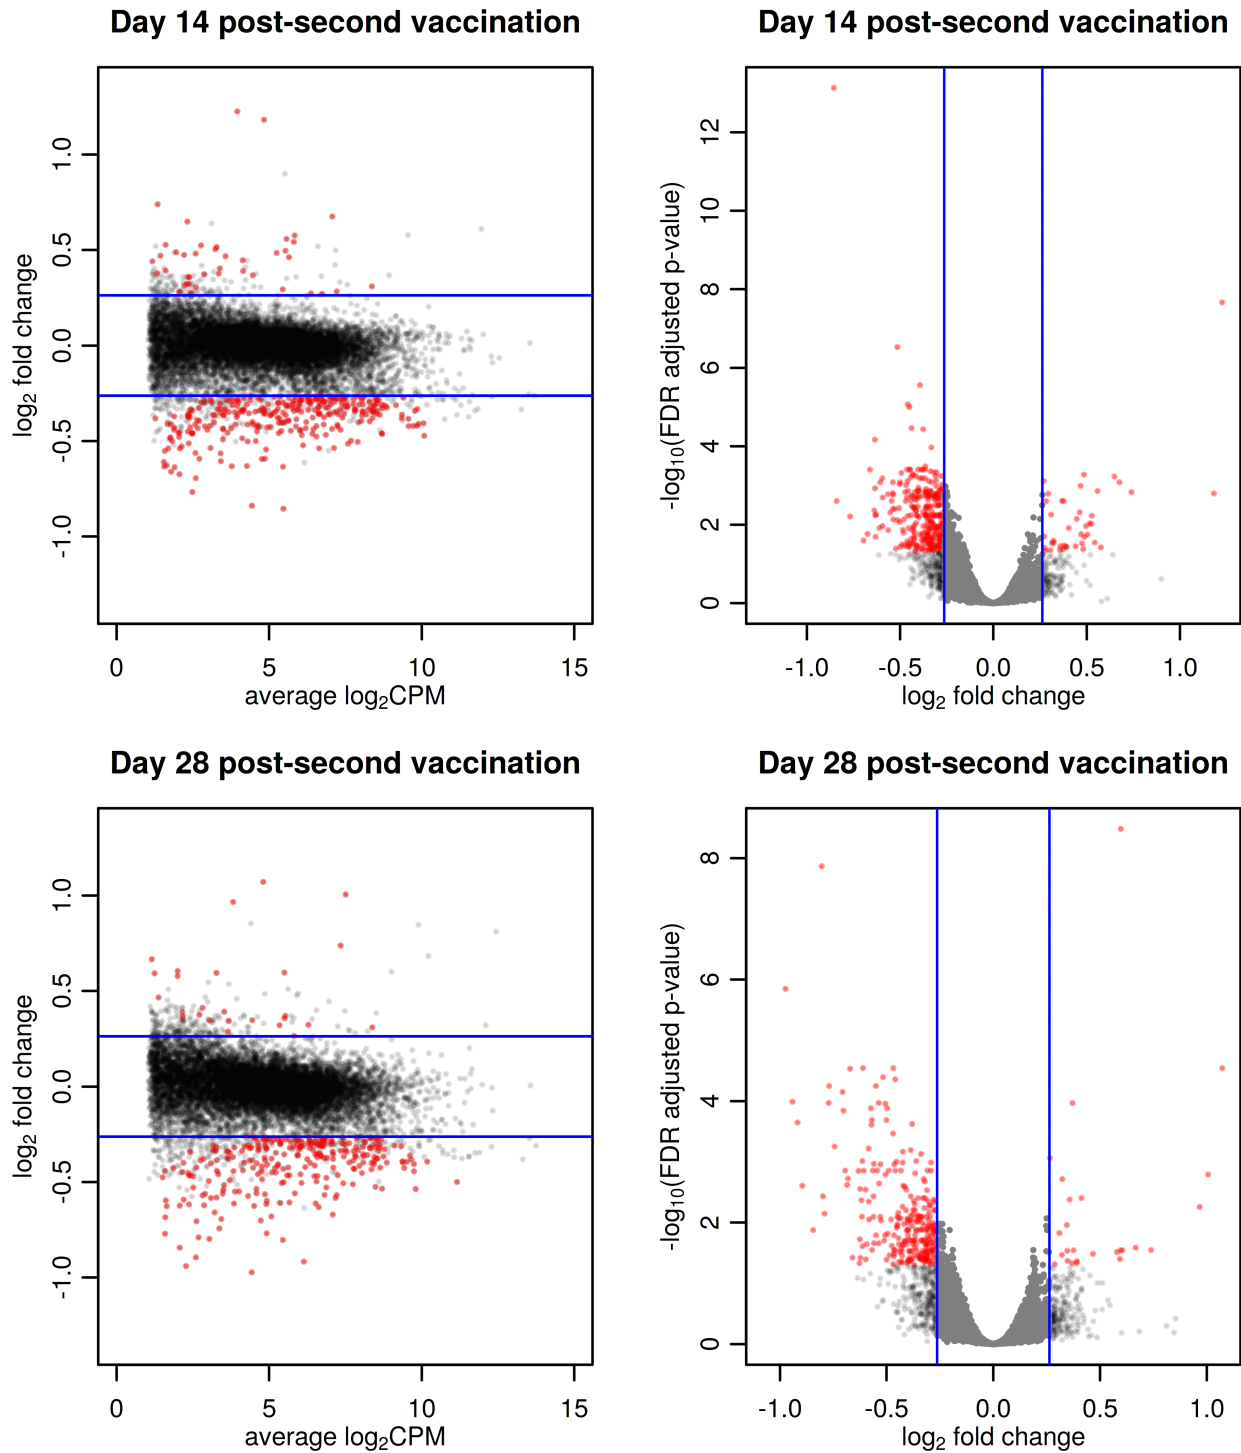



**Supplementary Figure 16:** KEGG Pathway Map - Amoebiasis (RNA-Seq, Day 28 post-second vaccination). Node color gradient encodes fold change from pre-vaccination (for multi-gene pathway nodes the median fold change is used). In red: up-regulated compared to pre-vaccination, in blue: down-regulated compared to pre-vaccination. In black: fold change close to 1, in dark grey: genes filtered out due to low overall expression, light grey: gene missing database mapping, white: non-human gene. DE genes are highlighted using red (significantly up-regulated) and blue (significantly down-regulated) node label and border colors.

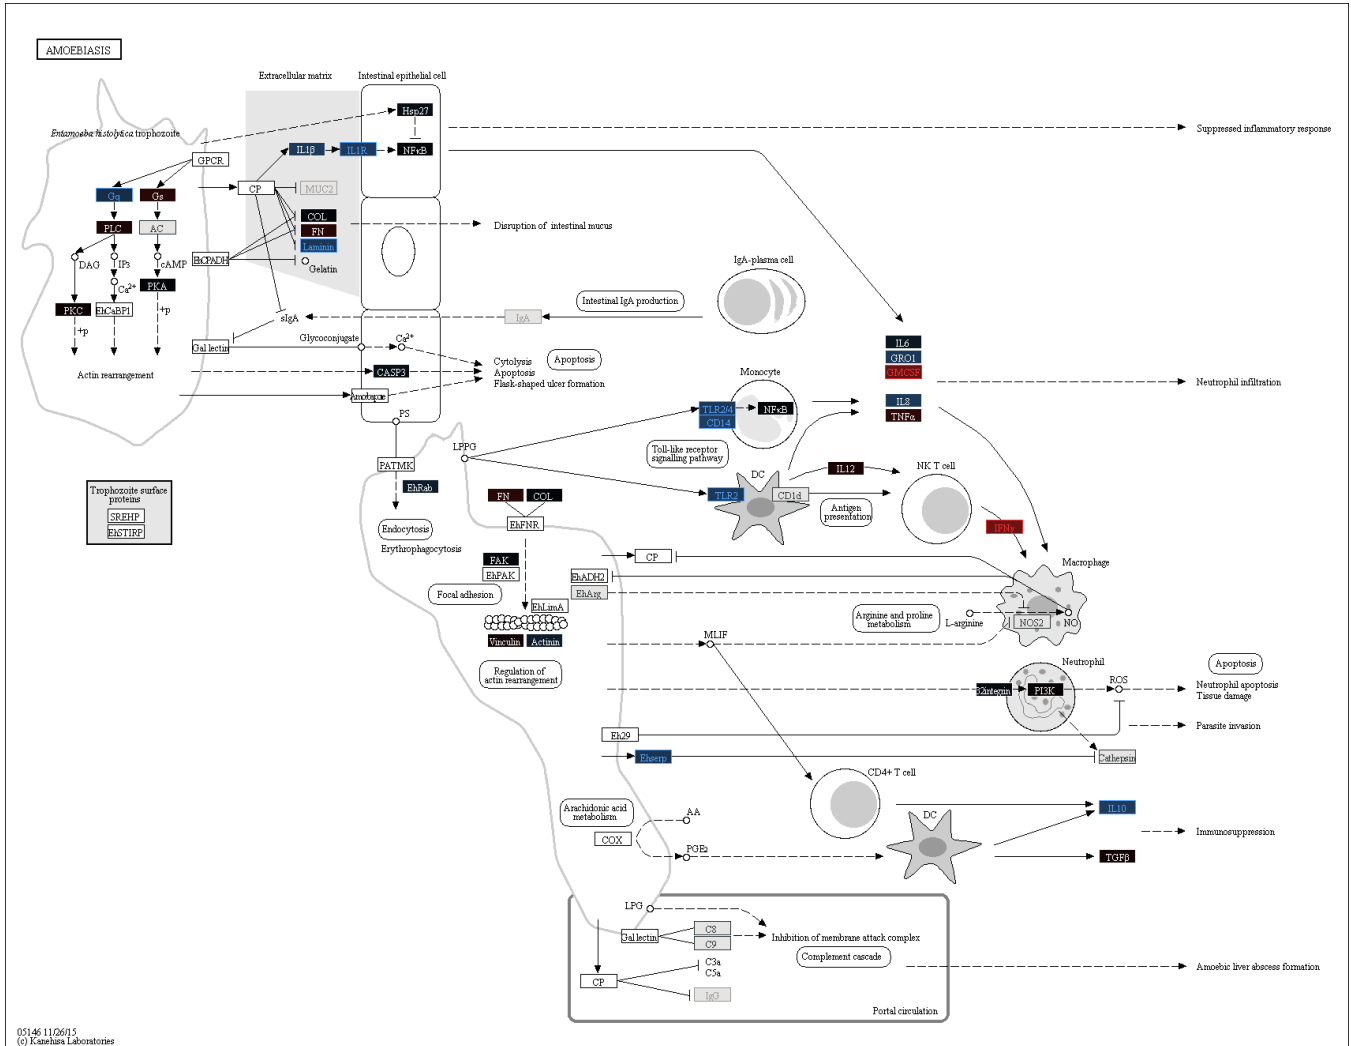

**Supplementary Figure 17: KEGG Pathway Map - Complement and coagulation cascades (RNA-Seq, Day 14 post-second vaccination).** Node color gradient encodes fold change from pre-vaccination (for multi-gene pathway nodes the median fold change is used). In red: up-regulated compared to pre-vaccination, in blue: down-regulated compared to pre-vaccination. In black: fold change close to 1, in dark grey: genes filtered out due to low overall expression, light grey: gene missing database mapping, white: non-human gene. DE genes are highlighted using red (significantly up-regulated) and blue (significantly down-regulated) node label and border colors.

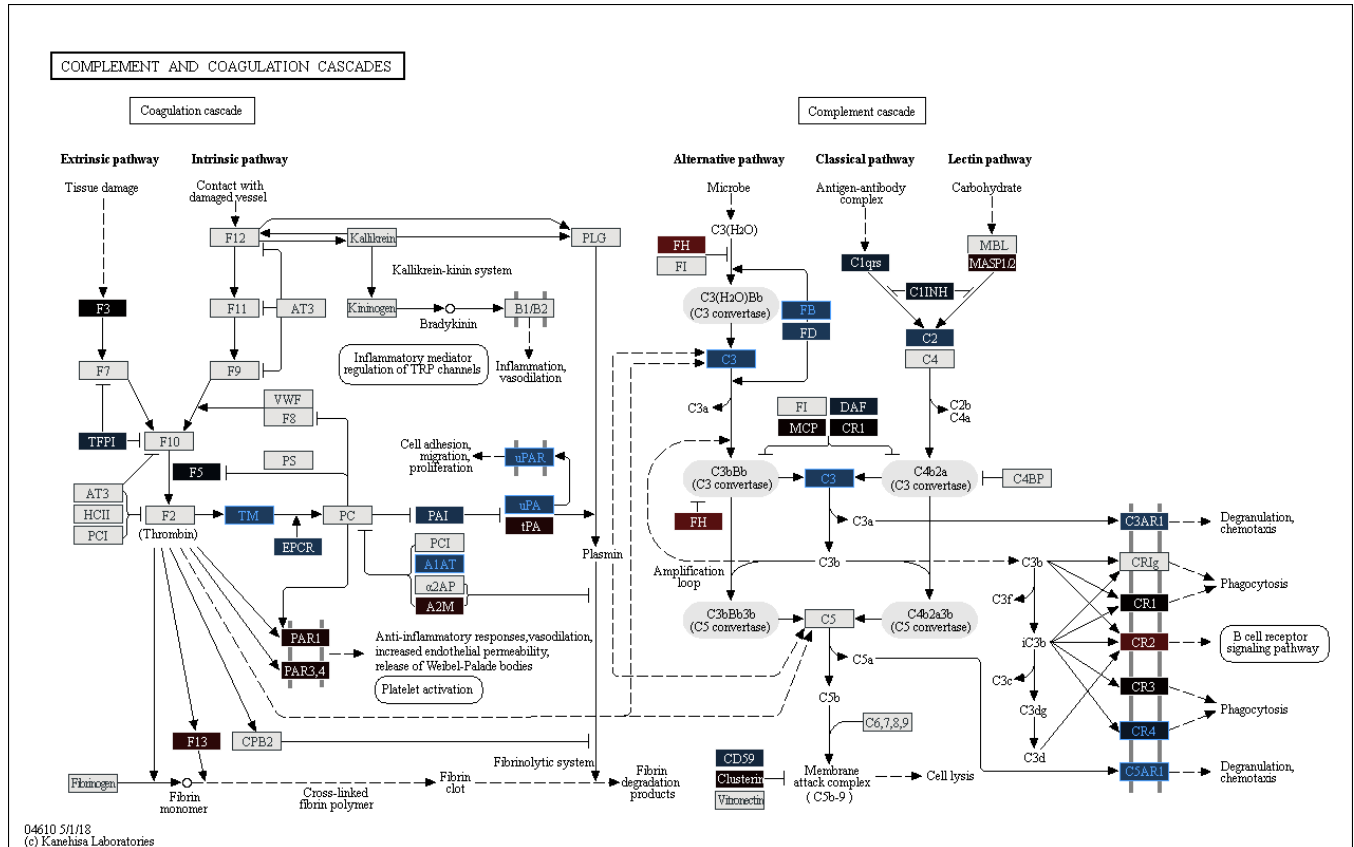







**Supplementary Figure 21: KEGG Pathway Map - Fluid shear stress and atherosclerosis (RNA-Seq, Day 14 post-second vaccination).** Node color gradient encodes fold change from pre-vaccination (for multi-gene pathway nodes the median fold change is used). In red: up-regulated compared to pre-vaccination, in blue: down-regulated compared to pre-vaccination. In black: fold change close to 1, in dark grey: genes filtered out due to low overall expression, light grey: gene missing database mapping, white: non-human gene. DE genes are highlighted using red (significantly up-regulated) and blue (significantly down-regulated) node label and border colors.

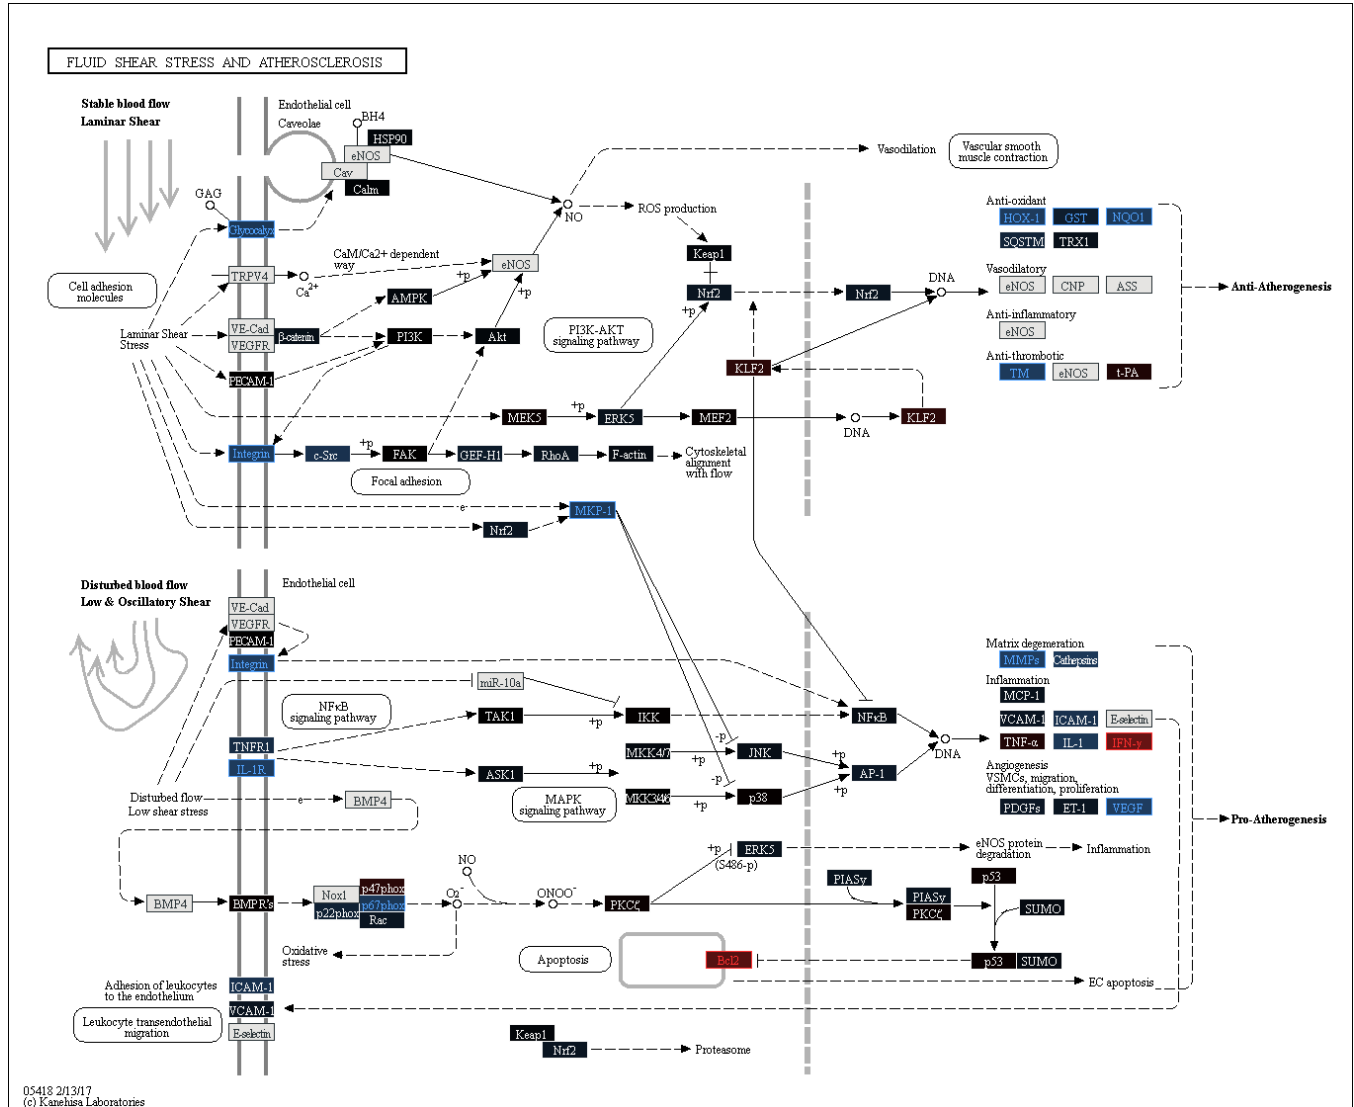

**Supplementary Figure 22: KEGG Pathway Map - Fluid shear stress and atherosclerosis (RNA-Seq, Day 28 post-second vaccination).** Node color gradient encodes fold change from pre-vaccination (for multi-gene pathway nodes the median fold change is used). In red: up-regulated compared to pre-vaccination, in blue: down-regulated compared to pre-vaccination. In black: fold change close to 1, in dark grey: genes filtered out due to low overall expression, light grey: gene missing database mapping, white: non-human gene. DE genes are highlighted using red (significantly up-regulated) and blue (significantly down-regulated) node label and border colors.

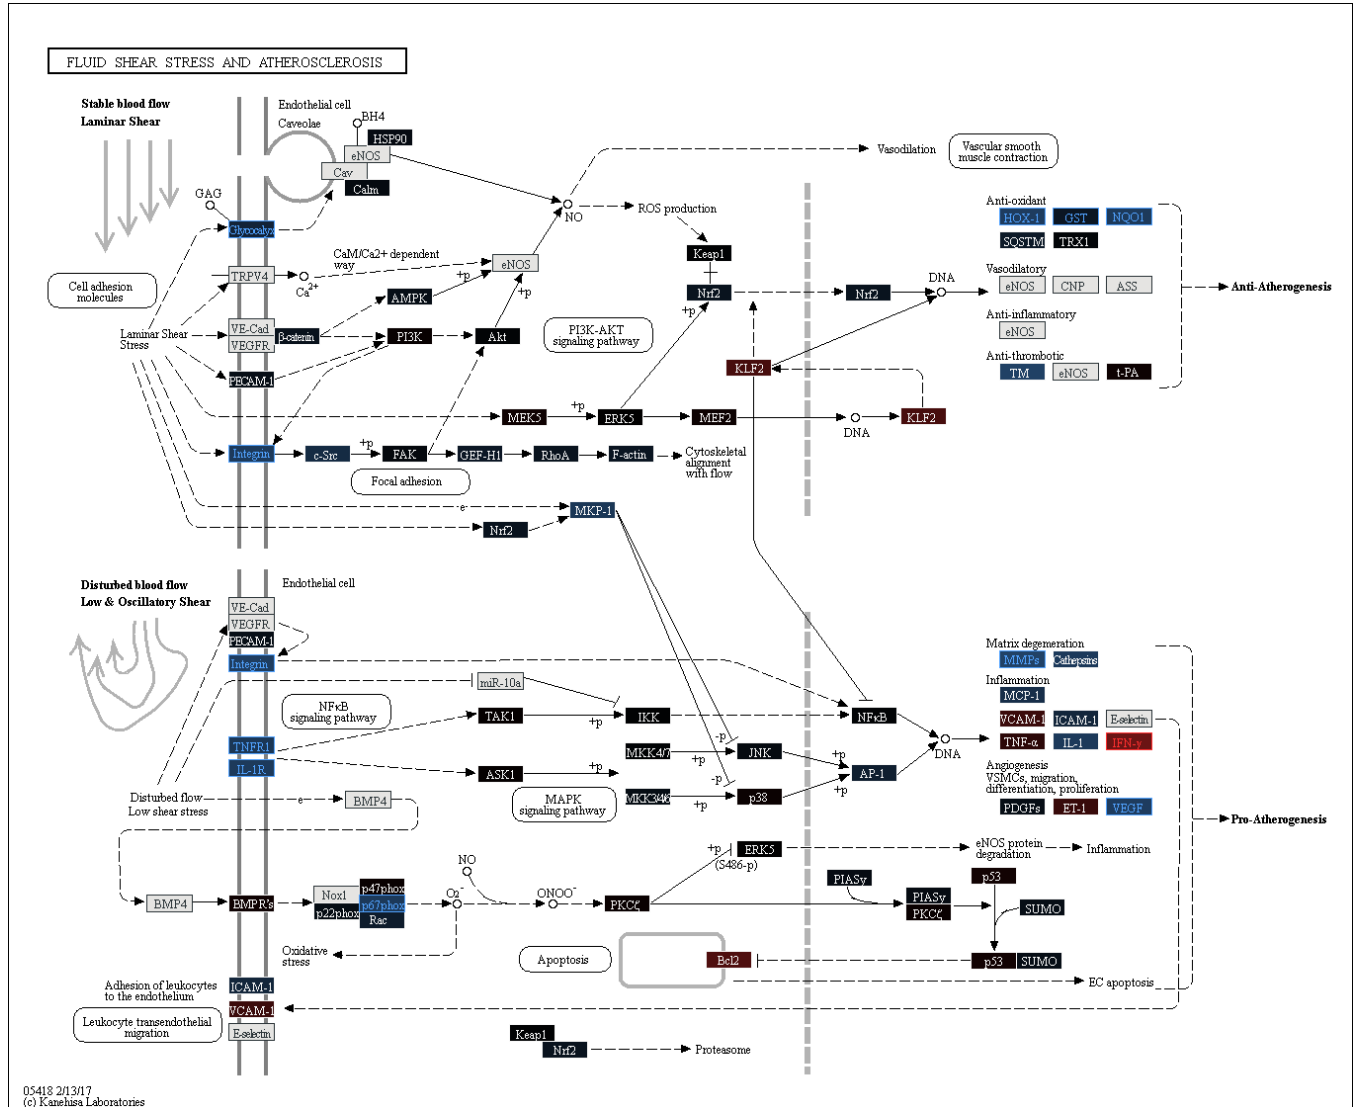





**Supplementary Figure 24: KEGG Pathway Map - IL-17 signaling pathway (RNA-Seq, Day 28 post-second vaccination).** Node color gradient encodes fold change from pre-vaccination (for multi-gene pathway nodes the median fold change is used). In red: up-regulated compared to pre-vaccination, in blue: down-regulated compared to pre-vaccination. In black: fold change close to 1, in dark grey: genes filtered out due to low overall expression, light grey: gene missing database mapping, white: non-human gene. DE genes are highlighted using red (significantly up-regulated) and blue (significantly down-regulated) node label and border colors.

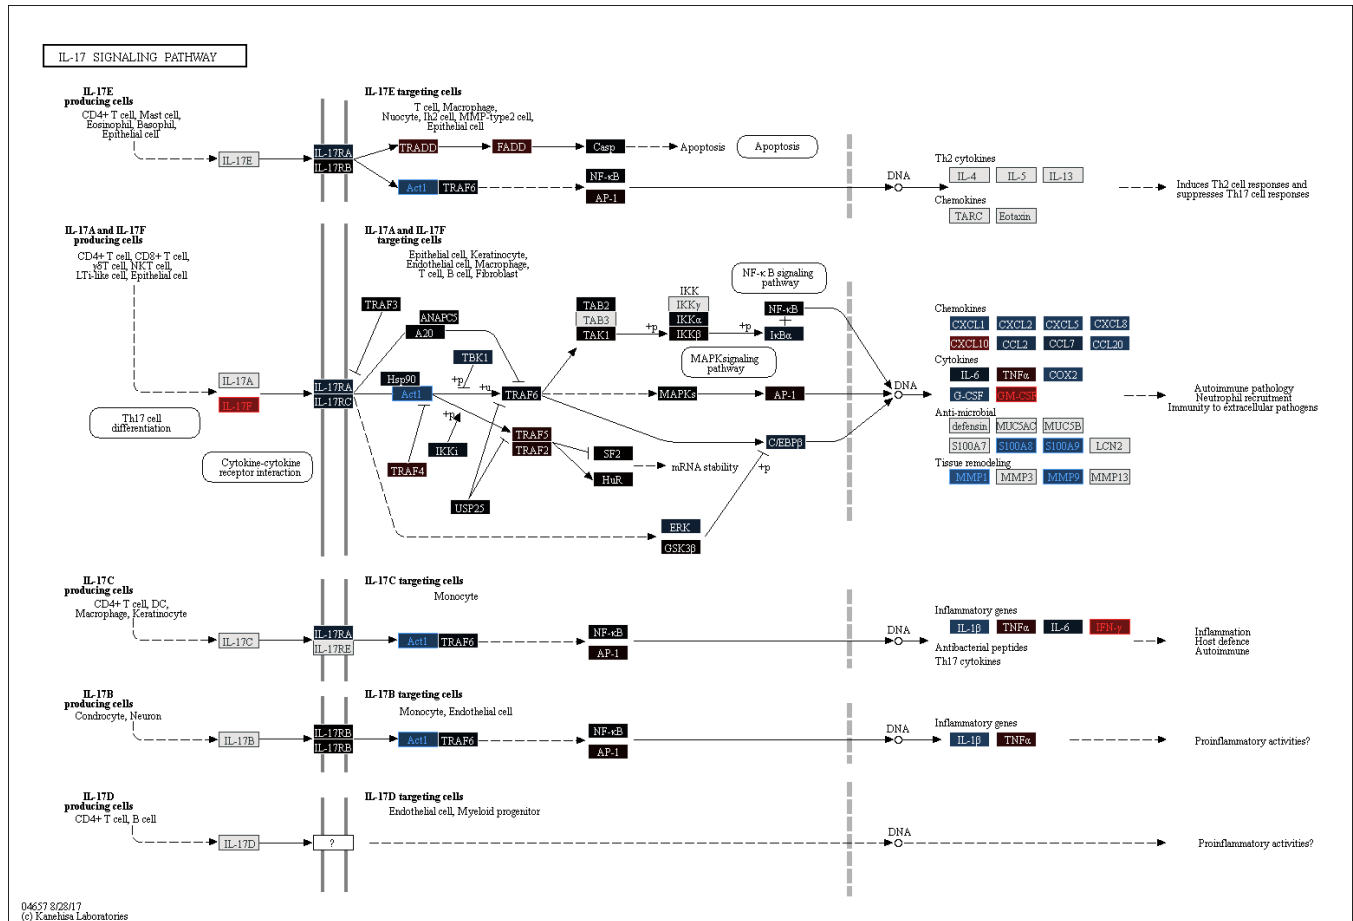

**Supplementary Figure 25:** KEGG Pathway Map - Jak-STAT signaling pathway (RNA-Seq, Day 14 post-second vaccination). Node color gradient encodes fold change from pre-vaccination (for multi-gene pathway nodes the median fold change is used). In red: up-regulated compared to pre-vaccination, in blue: down-regulated compared to pre-vaccination. In black: fold change close to 1, in dark grey: genes filtered out due to low overall expression, light grey: gene missing database mapping, white: non-human gene. DE genes are highlighted using red (significantly up-regulated) and blue (significantly down-regulated) node label and border colors.

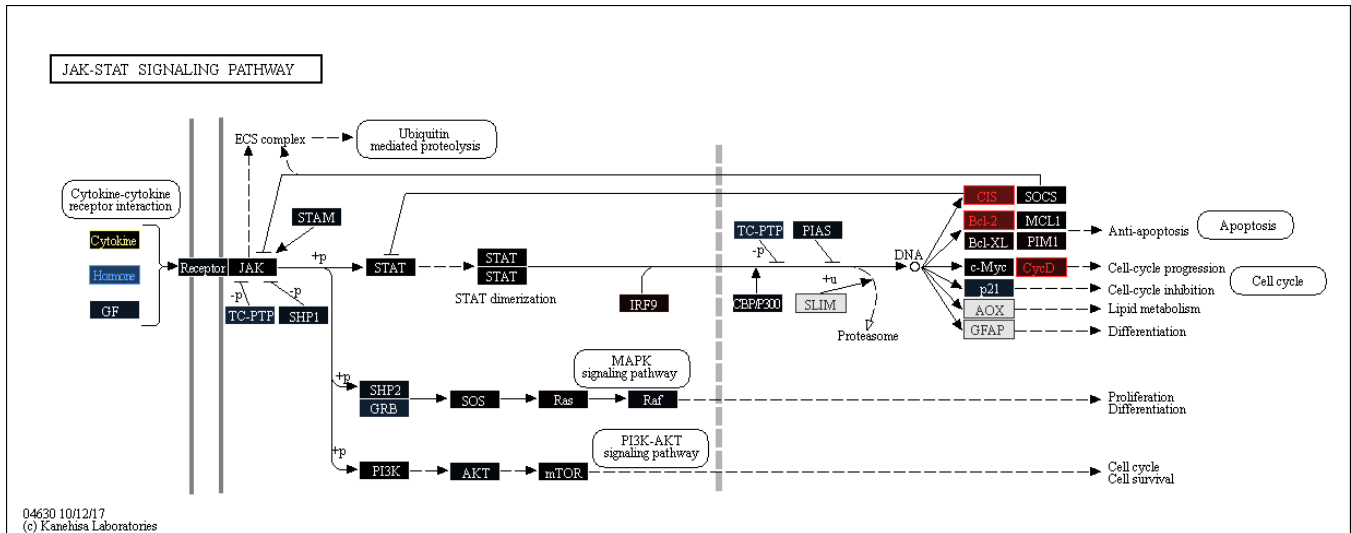

**Supplementary Figure 26: KEGG Pathway Map - Osteoclast differentiation (RNA-Seq, Day 14 post-second vaccination).** Node color gradient encodes fold change from pre-vaccination (for multi-gene pathway nodes the median fold change is used). In red: up-regulated compared to pre-vaccination, in blue: down-regulated compared to pre-vaccination. In black: fold change close to 1, in dark grey: genes filtered out due to low overall expression, light grey: gene missing database mapping, white: non-human gene. DE genes are highlighted using red (significantly up-regulated) and blue (significantly down-regulated) node label and border colors.

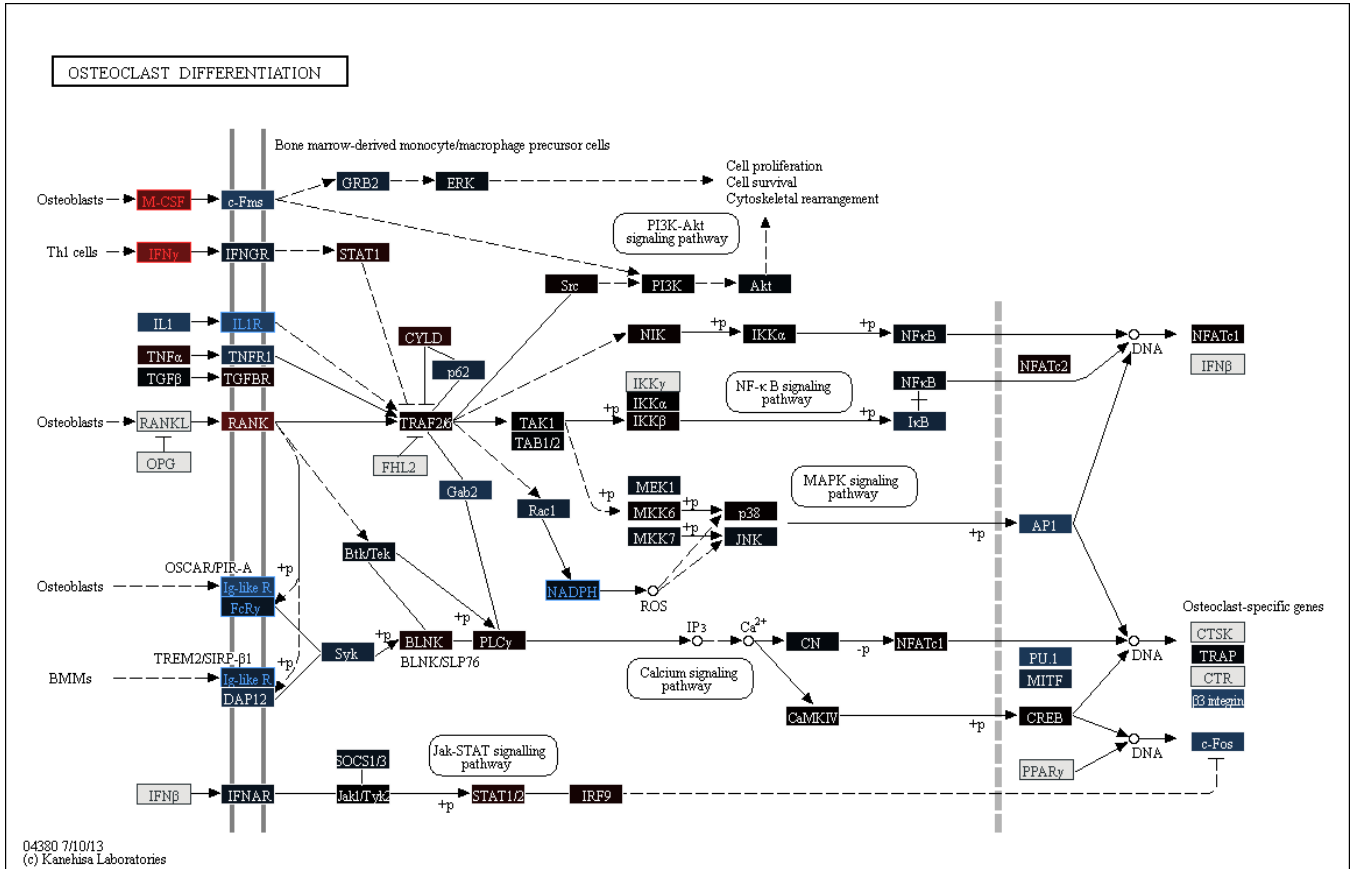

**Supplementary Figure 27: KEGG Pathway Map - Osteoclast differentiation (RNA-Seq, Day 28 post-second vaccination).** Node color gradient encodes fold change from pre-vaccination (for multi-gene pathway nodes the median fold change is used). In red: up-regulated compared to pre-vaccination, in blue: down-regulated compared to pre-vaccination. In black: fold change close to 1, in dark grey: genes filtered out due to low overall expression, light grey: gene missing database mapping, white: non-human gene. DE genes are highlighted using red (significantly up-regulated) and blue (significantly down-regulated) node label and border colors.

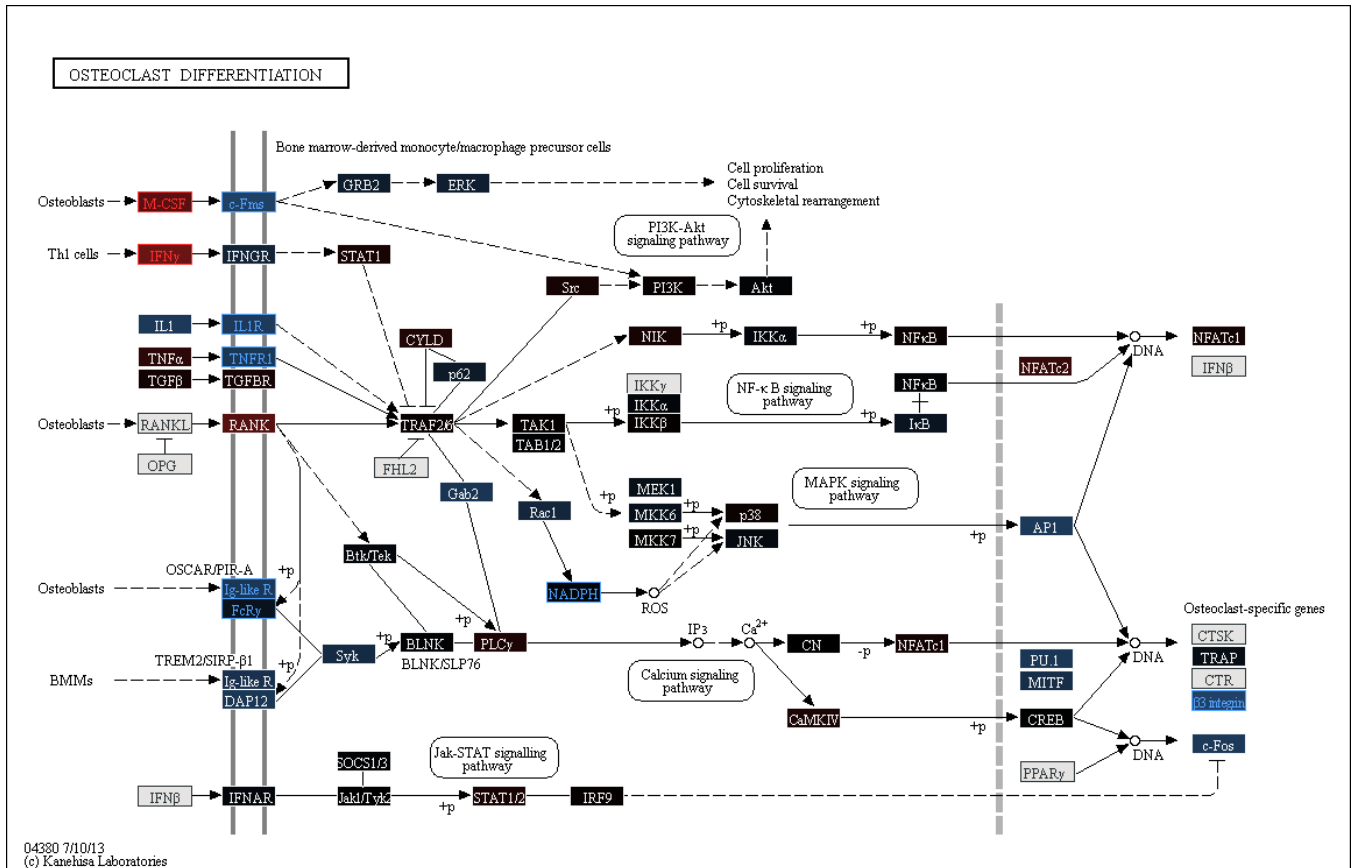

**Supplementary Figure 28:** KEGG Pathway Map - Phagosome (RNA-Seq, Day 28 post-second vaccination). Node color gradient encodes fold change from pre-vaccination (for multi-gene pathway nodes the median fold change is used). In red: up-regulated compared to pre-vaccination, in blue: down-regulated compared to pre-vaccination. In black: fold change close to 1, in dark grey: genes filtered out due to low overall expression, light grey: gene missing database mapping, white: non-human gene. DE genes are highlighted using red (significantly up-regulated) and blue (significantly down-regulated) node label and border colors.

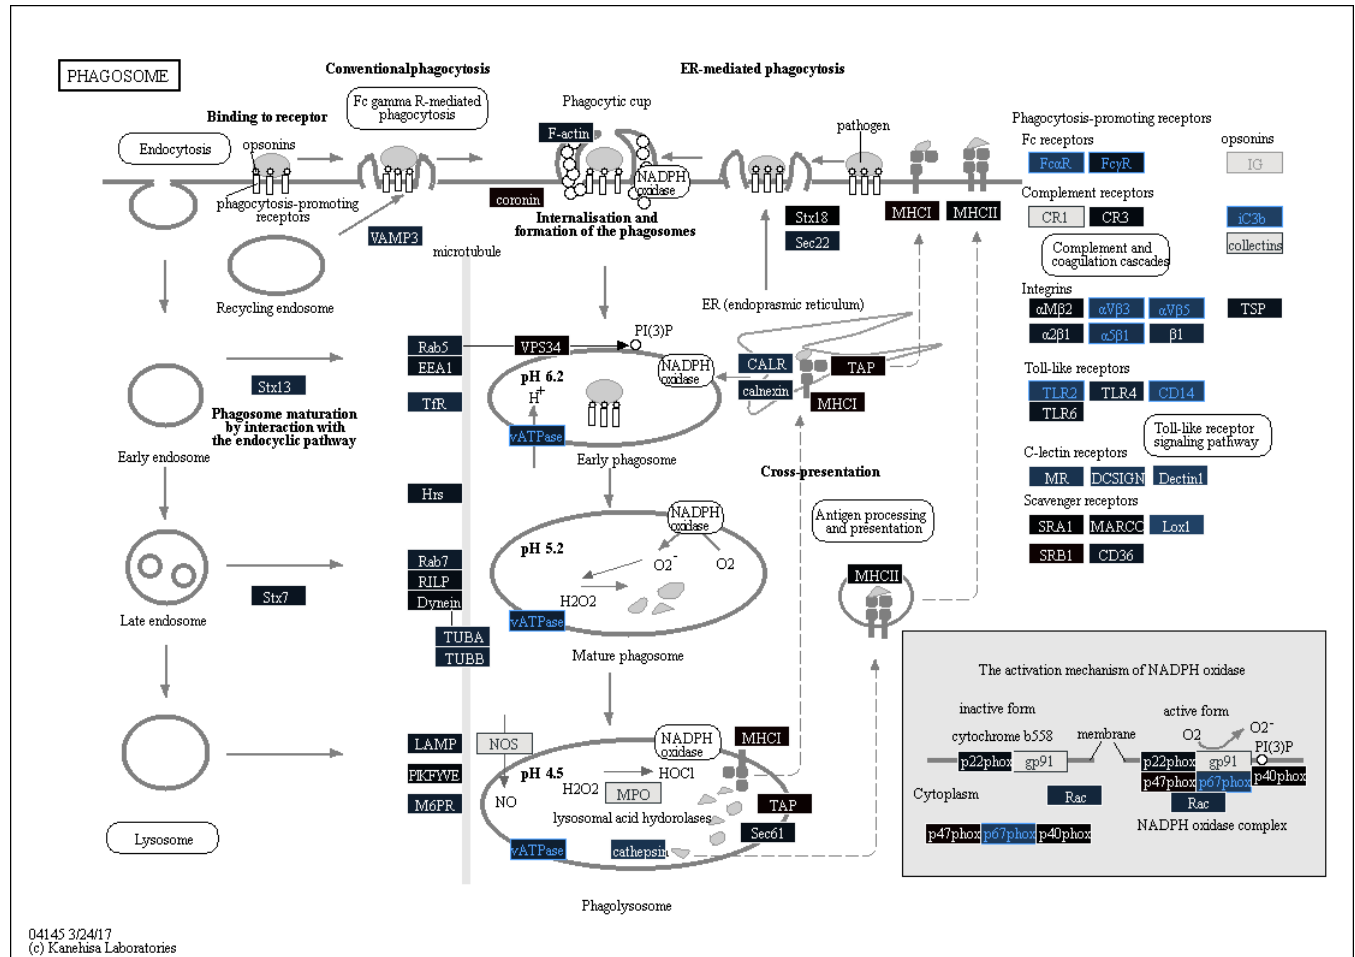





**Supplementary Figure 31: KEGG Pathway Map - Rheumatoid arthritis (RNA-Seq, Day 28 post-second vaccination).** Node color gradient encodes fold change from pre-vaccination (for multi-gene pathway nodes the median fold change is used). In red: up-regulated compared to pre-vaccination, in blue: down-regulated compared to pre-vaccination. In black: fold change close to 1, in dark grey: genes filtered out due to low overall expression, light grey: gene missing database mapping, white: non-human gene. DE genes are highlighted using red (significantly up-regulated) and blue (significantly down-regulated) node label and border colors.

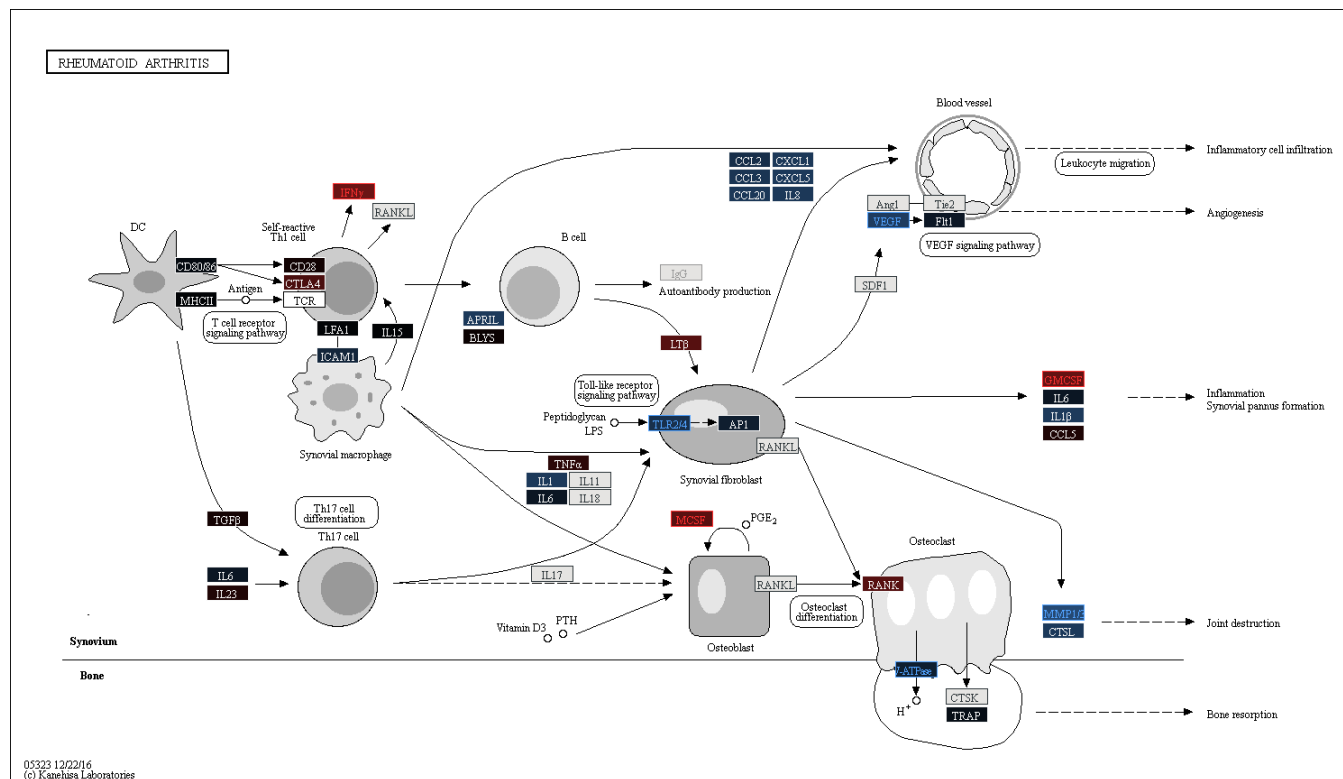



**Supplementary Figure 32: KEGG Pathway Map - Staphylococcus aureus infection (RNA-Seq, Day 14 post-second vaccination).** Node color gradient encodes fold change from pre-vaccination (for multi-gene pathway nodes the median fold change is used). In red: up-regulated compared to pre-vaccination, in blue: down-regulated compared to pre-vaccination. In black: fold change close to 1, in dark grey: genes filtered out due to low overall expression, light grey: gene missing database mapping, white: non-human gene. DE genes are highlighted using red (significantly up-regulated) and blue (significantly down-regulated) node label and border colors.

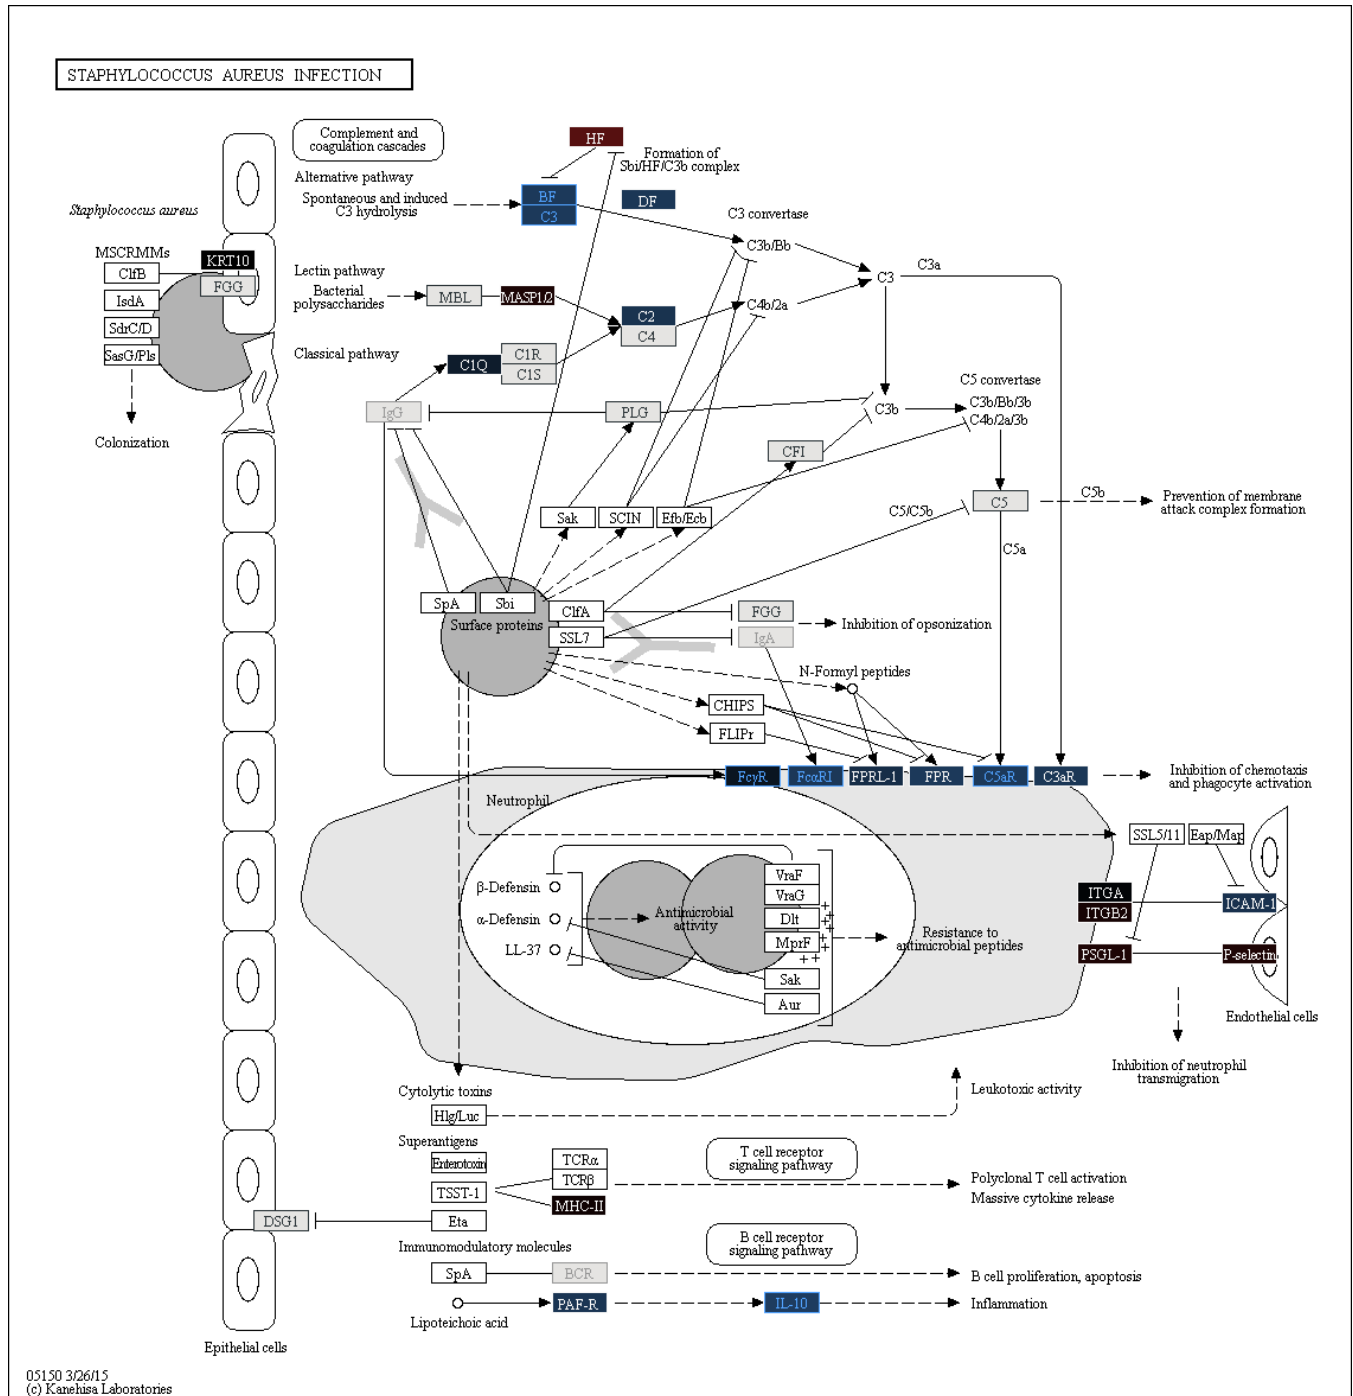

**Supplementary Figure 33: KEGG Pathway Map - Staphylococcus aureus infection (RNA-Seq, Day 28 post-second vaccination).** Node color gradient encodes fold change from pre-vaccination (for multi-gene pathway nodes the median fold change is used). In red: up-regulated compared to pre-vaccination, in blue: down-regulated compared to pre-vaccination. In black: fold change close to 1, in dark grey: genes filtered out due to low overall expression, light grey: gene missing database mapping, white: non-human gene. DE genes are highlighted using red (significantly up-regulated) and blue (significantly down-regulated) node label and border colors.

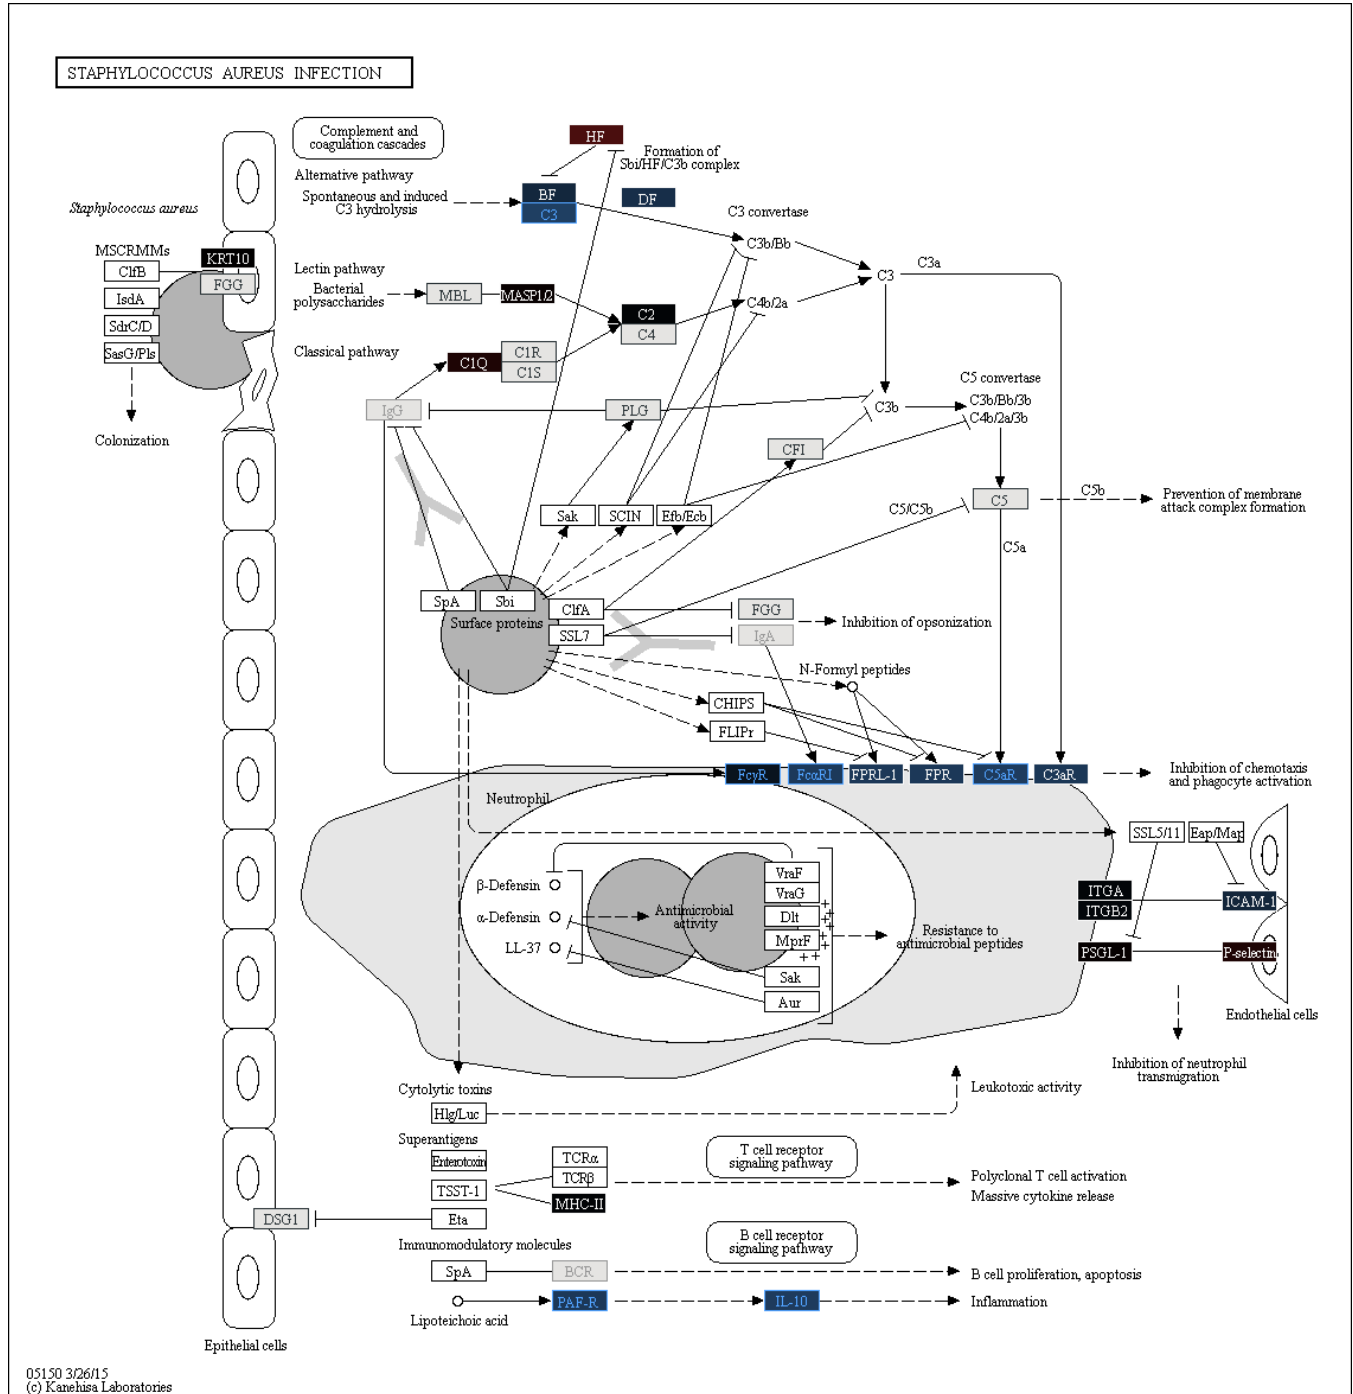

**Supplementary Figure 34: KEGG Pathway Map - Tuberculosis (RNA-Seq, Day 14 post-second vaccination).** Node color gradient encodes fold change from pre-vaccination (for multi-gene pathway nodes the median fold change is used). In red: up-regulated compared to pre-vaccination, in blue: down-regulated compared to pre-vaccination. In black: fold change close to 1, in dark grey: genes filtered out due to low overall expression, light grey: gene missing database mapping, white: non-human gene. DE genes are highlighted using red (significantly up-regulated) and blue (significantly down-regulated) node label and border colors.

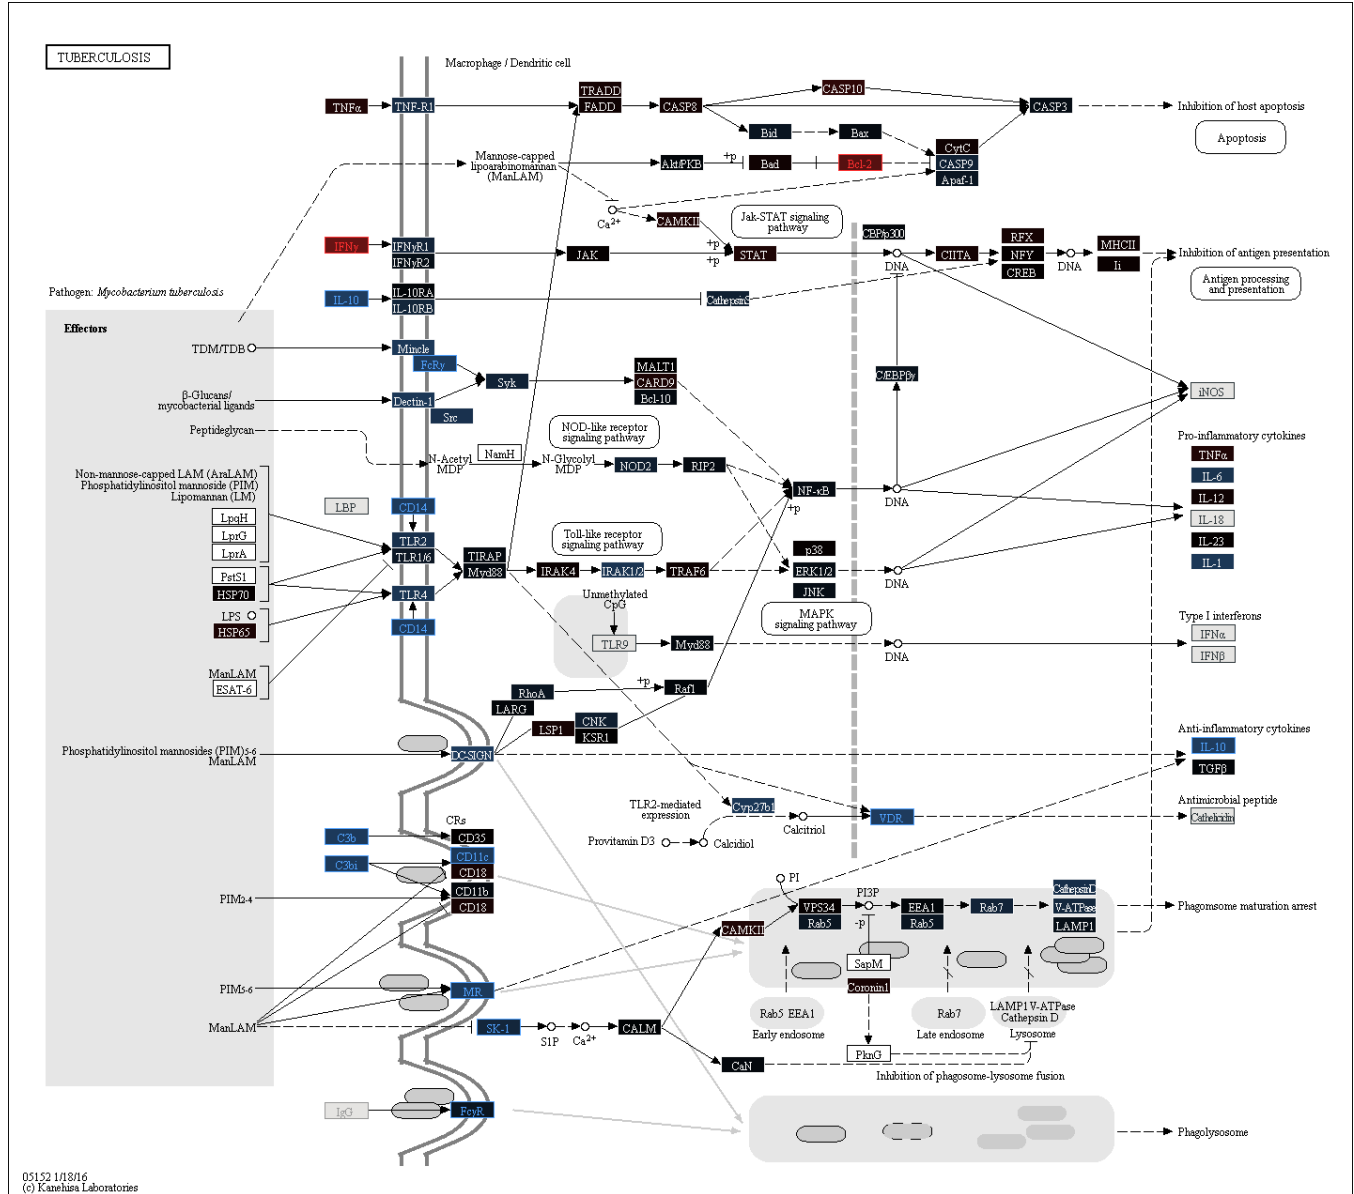



**Supplementary Figure 36:** Pathway enrichment analysis Venn diagrams summarizing overlap in significantly enriched gene sets between post-vaccination days (RNA-Seq). To determine significantly enriched gene sets, DE genes were used. Timepoints day 14 and day 28 refer to days 14 and 28 post-second vaccination.

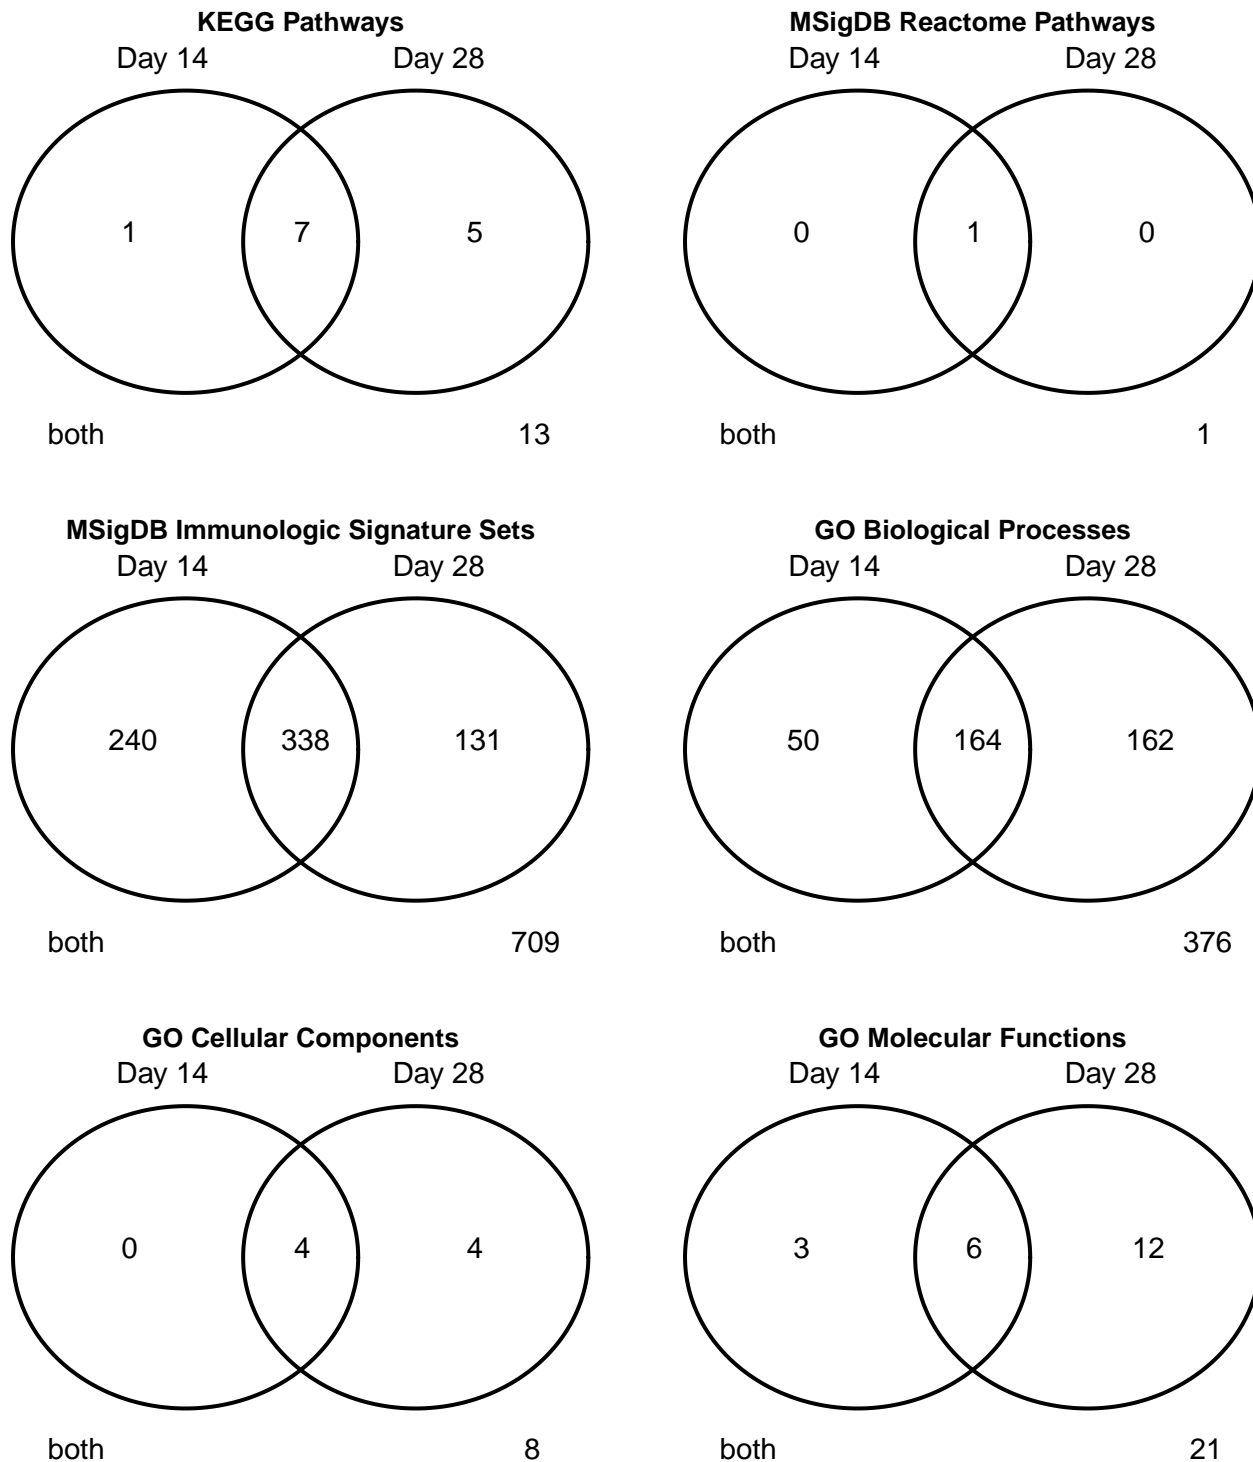

**Supplementary Figure 37:** Scatterplots that summarize the correlation between peak  $\log_2$  Inverse Caspase-3 Levels and  $\log_2$  fold change response for genes identified using regularized linear regression (RNA-Seq, Day 14 post-second vaccination). Sorted by absolute descending regularized linear regression coefficient. The green solid trend line represents a locally weighted regression fit.

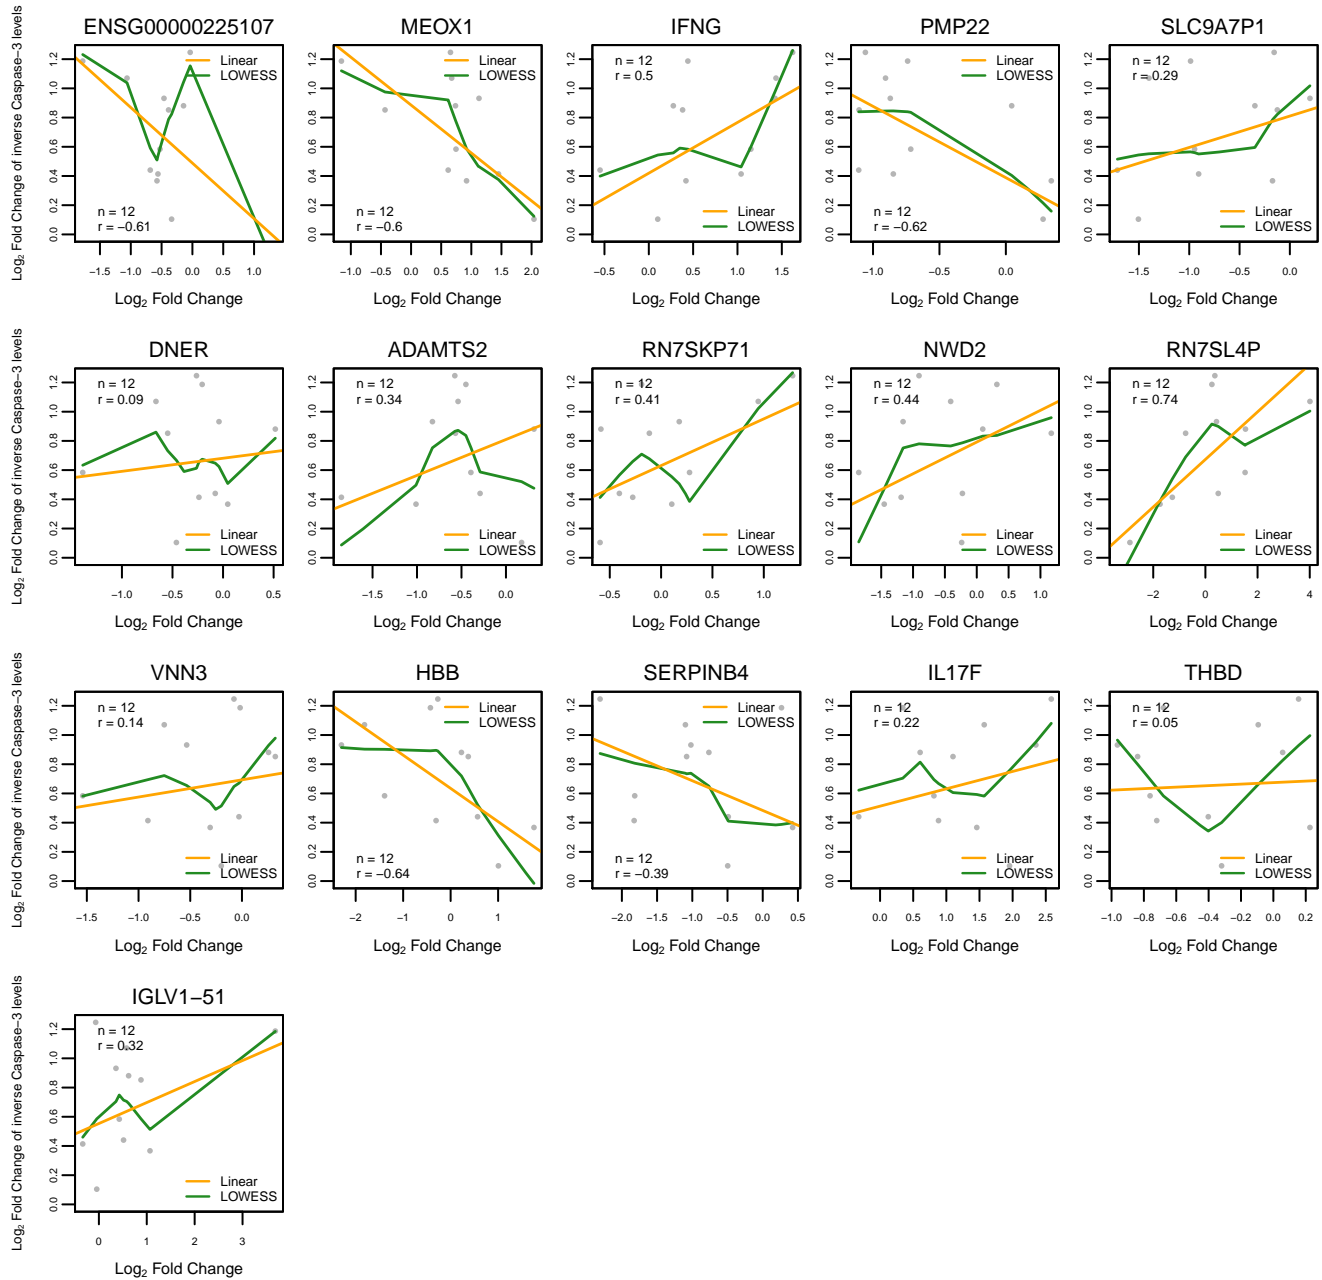



**Supplementary Figure 39:** Canonical correlation plots summarizing gene responses best correlated with changes in proliferating cytokine producing T-cell responses (RNA-Seq, Day 14 post-second vaccination). In brown: proliferating cytokine producing T-cell variables, red/blue: gene variables color-coded by baseline log fold change (up/down), +/- prefix: SDEG yes/no, colored-dots: pathway class, grey lines: robust clusters.

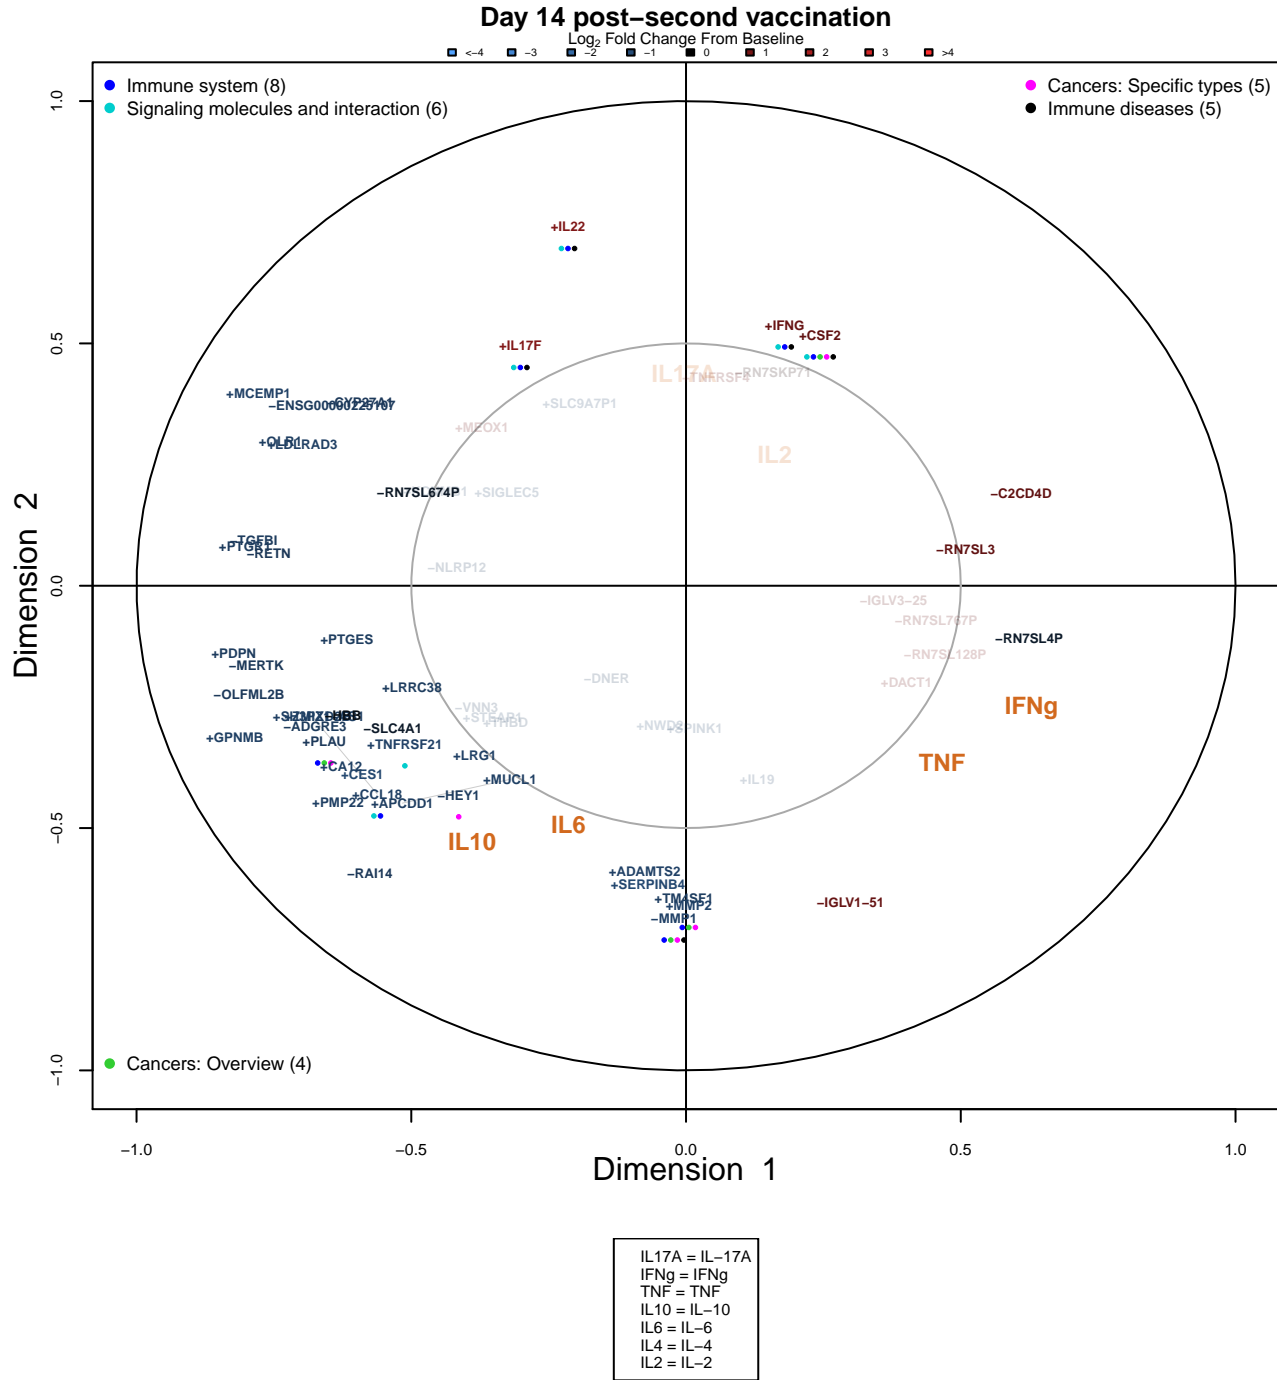



**Supplementary Figure 40:** Canonical correlation plots summarizing gene responses best correlated with changes in cytokine responses (RNA-Seq, Day 28 post-second vaccination). In brown: cytokine variables, red/blue: gene variables color-coded by baseline log fold change (up/down), +/- prefix: SDEG yes/no, colored-dots: pathway class, grey lines: robust clusters.

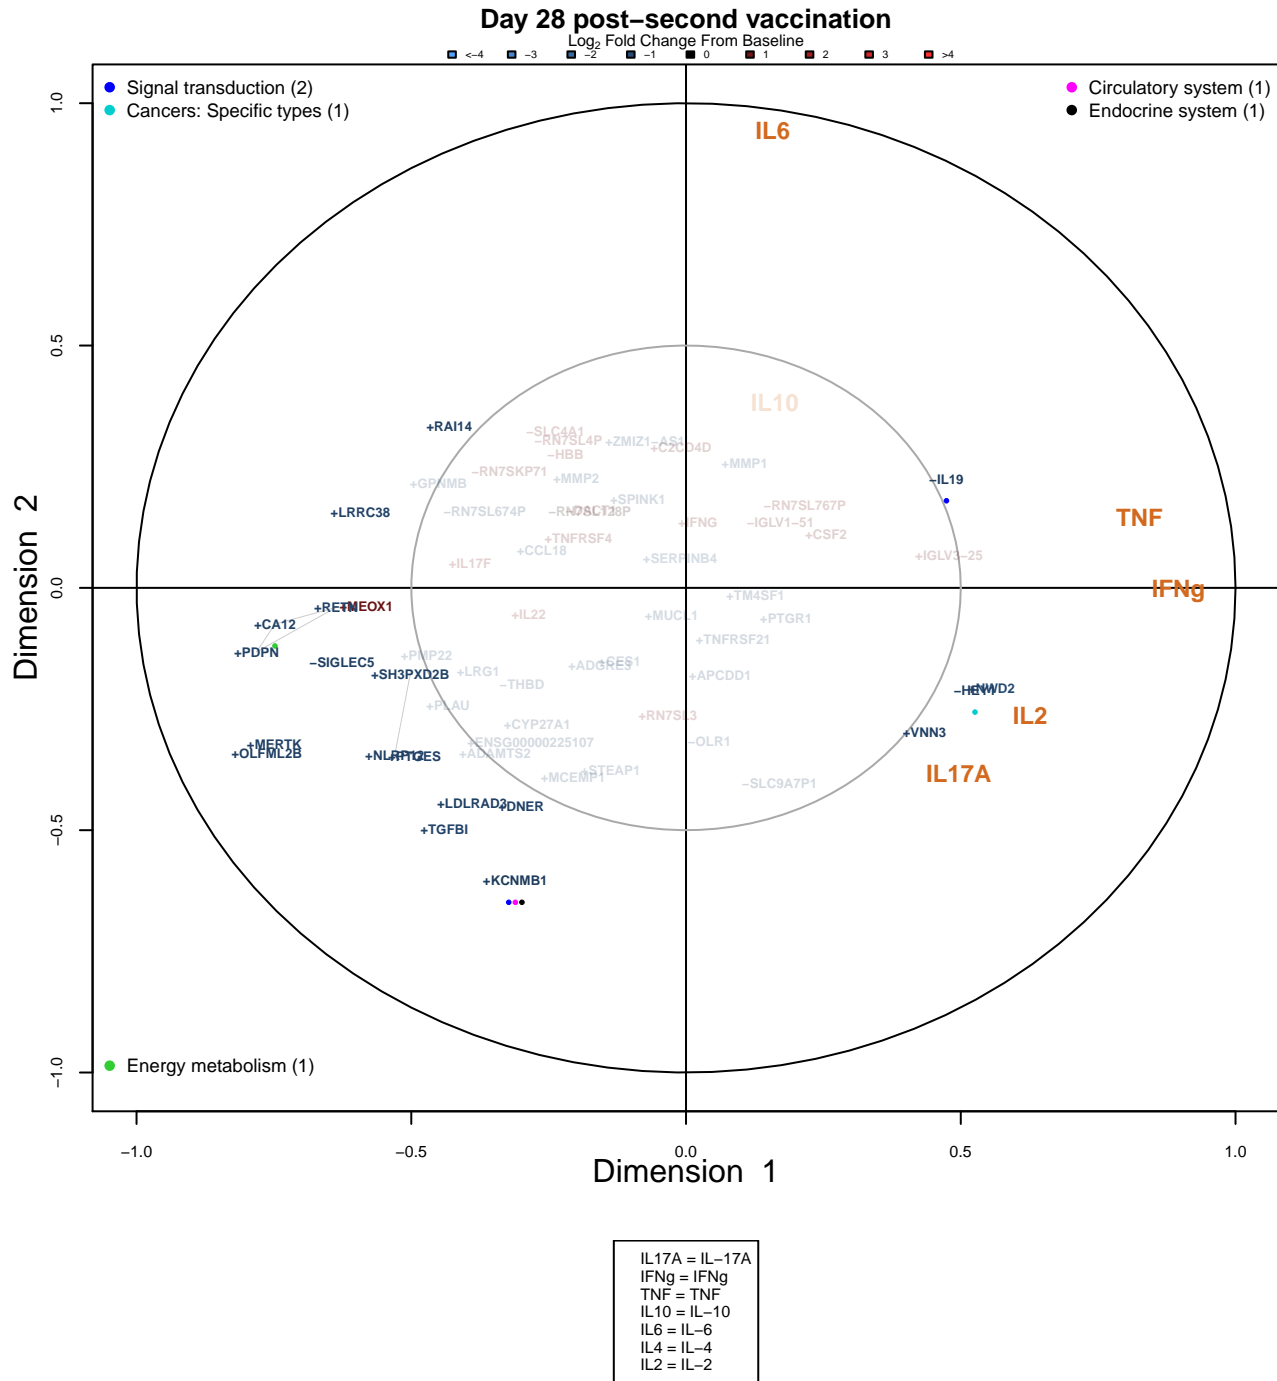

## Tables

**Supplementary Table 1:** Summary of categorical demographic and baseline characteristics for the immunogenicity analysis population. Three of the 16 subjects only consented to deidentified future use. As a consequence, they are missing from this summary.

| Variable    | Characteristic                      | N                      | %  |
|-------------|-------------------------------------|------------------------|----|
| <b>Sex</b>  | Male                                | 10                     | 77 |
|             | Female                              | 3                      | 23 |
| <b>Race</b> | American Indian or Native Alaskan   | 1                      | 8  |
|             | Asian                               | 1                      | 8  |
|             | Native Hawaiian or Pacific Islander | 0                      | 0  |
|             | Black or African American           | 1                      | 8  |
|             | White                               | 10                     | 77 |
|             | Unknown                             | 0                      | 0  |
|             | Multi-Race                          | 0                      | 0  |
|             | <b>Ethnicity</b>                    | Not Hispanic or Latino | 13 |

**Supplementary Table 2:** Summary of age demographic characteristics for the immunogenicity analysis population. Three of the 16 subjects only consented to deidentified future use. As a consequence, they are missing from this summary.

| Statistic                 |      |
|---------------------------|------|
| <b>Mean</b>               | 30.3 |
| <b>Standard Deviation</b> | 6.8  |
| <b>Median</b>             | 29   |
| <b>Minimum</b>            | 21   |
| <b>Maximum</b>            | 42   |

**Supplementary Table 3:** Summary of categorical demographic and baseline characteristics for the transcriptomics analysis population. Two of the 12 subjects only consented to deidentified future use. As a consequence, they are missing from this summary.

| Variable    | Characteristic                      | N                      | %  |
|-------------|-------------------------------------|------------------------|----|
| <b>Sex</b>  | Male                                | 7                      | 70 |
|             | Female                              | 3                      | 30 |
| <b>Race</b> | American Indian or Native Alaskan   | 0                      | 0  |
|             | Asian                               | 1                      | 10 |
|             | Native Hawaiian or Pacific Islander | 0                      | 0  |
|             | Black or African American           | 0                      | 0  |
|             | White                               | 9                      | 90 |
|             | Unknown                             | 0                      | 0  |
|             | Multi-Race                          | 0                      | 0  |
|             | <b>Ethnicity</b>                    | Not Hispanic or Latino | 10 |

**Supplementary Table 4:** Summary of age demographic characteristics for the transcriptomics analysis population. Two of the 12 subjects only consented to deidentified future use. As a consequence, they are missing from this summary.

| Statistic                 |      |
|---------------------------|------|
| <b>Mean</b>               | 30.4 |
| <b>Standard Deviation</b> | 6.2  |
| <b>Median</b>             | 28   |
| <b>Minimum</b>            | 23   |
| <b>Maximum</b>            | 42   |

**Supplementary Table 5:** Summaries of inverse normalized anti-V-antigen antibody caspase-3 levels by study visit day and treatment group

|                                    | <b>Flagellin/F1/V 6<math>\mu</math>g (N=8)</b> | <b>Flagellin/F1/V 10<math>\mu</math>g (N=8)</b> | <b>Combined (N=16)</b> |
|------------------------------------|------------------------------------------------|-------------------------------------------------|------------------------|
| <b>Study Visit Day / Statistic</b> |                                                |                                                 |                        |
| <b>Day 0 Pre-Vaccination 1</b>     |                                                |                                                 |                        |
| n                                  | 8                                              | 8                                               | 16                     |
| Minimum                            | 0.935                                          | 1.611                                           | 0.935                  |
| Q1                                 | 1.37                                           | 2.02                                            | 1.76                   |
| Median (95% CI)                    | 1.929 (1.027, 2.59)                            | 2.49 (1.851, 3.326)                             | 2.079 (1.731, 2.679)   |
| MAD                                | 0.82                                           | 1.06                                            | 0.73                   |
| Q3                                 | 2.2                                            | 3.3                                             | 2.65                   |
| Maximum                            | 2.841                                          | 3.38                                            | 3.38                   |
| <b>Day 14 Post-Vaccination 2</b>   |                                                |                                                 |                        |
| n                                  | 8                                              | 8                                               | 16                     |
| Minimum                            | 1.923                                          | 1.572                                           | 1.572                  |
| Q1                                 | 2.06                                           | 2.54                                            | 2.06                   |
| Median (95% CI)                    | 2.341 (1.963, 3.182)                           | 3.206 (1.89, 4.479)                             | 2.715 (2.088, 3.424)   |
| MAD                                | 0.52                                           | 1.87                                            | 1.02                   |
| Q3                                 | 2.8                                            | 4.46                                            | 3.34                   |
| Maximum                            | 3.663                                          | 5.73                                            | 5.73                   |
| <b>Day 28 Post-Vaccination 2</b>   |                                                |                                                 |                        |
| n                                  | 8                                              | 7                                               | 15                     |
| Minimum                            | 1.921                                          | 2.414                                           | 1.921                  |
| Q1                                 | 2.56                                           | 4.03                                            | 2.77                   |
| Median (95% CI)                    | 2.898 (1.959, 3.29)                            | 4.575 (3.533, 6.103)                            | 3.29 (2.764, 4.575)    |
| MAD                                | 0.49                                           | 1.54                                            | 1.3                    |
| Q3                                 | 3.19                                           | 5.52                                            | 4.55                   |
| Maximum                            | 3.858                                          | 6.159                                           | 6.159                  |

**Supplementary Table 6:** Summaries of the fold change in inverse normalized anti-V-antigen antibody caspase-3 levels by study visit day and treatment group

|                                                        | Flagellin/F1/V 6 $\mu$ g (N=8) | Flagellin/F1/V 10 $\mu$ g (N=8) | Combined (N=16)      |
|--------------------------------------------------------|--------------------------------|---------------------------------|----------------------|
| <b>Study Visit Day / Statistic</b>                     |                                |                                 |                      |
| <b>Day 14 Post-Vaccination 2 vs. Pre-Vaccination 1</b> |                                |                                 |                      |
| n                                                      | 8                              | 8                               | 16                   |
| Minimum                                                | 0.806                          | 0.816                           | 0.806                |
| Q1                                                     | 1.23                           | 0.92                            | 1.12                 |
| Median (95% CI)                                        | 1.288 (1.182, 2.1)             | 1.242 (0.849, 2.139)            | 1.288 (1.173, 1.873) |
| MAD                                                    | 0.44                           | 0.51                            | 0.58                 |
| Q3                                                     | 1.93                           | 1.56                            | 1.93                 |
| Maximum                                                | 2.151                          | 2.276                           | 2.276                |
| <b>Day 28 Post-Vaccination 2 vs. Pre-Vaccination 1</b> |                                |                                 |                      |
| n                                                      | 8                              | 7                               | 15                   |
| Minimum                                                | 1.075                          | 1.357                           | 1.075                |
| Q1                                                     | 1.29                           | 1.45                            | 1.38                 |
| Median (95% CI)                                        | 1.609 (1.158, 2.054)           | 1.806 (1.404, 1.878)            | 1.753 (1.357, 1.878) |
| MAD                                                    | 0.55                           | 0.45                            | 0.45                 |
| Q3                                                     | 1.94                           | 1.86                            | 1.89                 |
| Maximum                                                | 2.608                          | 2.373                           | 2.608                |

**Supplementary Table 7:** Spearman correlation between fold change in ELISA IgG and change in protective antibody response

| ELISA Results                               |                                                                                  | Caspase-3 Results                                                                                                    | Spearman Correlation (p-value) [n] |
|---------------------------------------------|----------------------------------------------------------------------------------|----------------------------------------------------------------------------------------------------------------------|------------------------------------|
| <b>ELISA IgG titer (F1 antigen)</b>         | Log <sub>2</sub> fold change in ELISA IgG titer (Day 14 post-second vaccination) | Log <sub>2</sub> fold change in normalized anti-V-antigen antibody caspase-3 levels (Day 14 post-second vaccination) | 0.165<br>(0.5729)<br>[14]          |
|                                             | Log <sub>2</sub> fold change in ELISA IgG titer (Day 28 post-second vaccination) | Log <sub>2</sub> fold change in normalized anti-V-antigen antibody caspase-3 levels (Day 28 post-second vaccination) | 0.2<br>(0.493)<br>[14]             |
| <b>ELISA IgG concentration (F1 antigen)</b> | Log <sub>2</sub> fold change in ELISA IgG conc (Day 14 post-second vaccination)  | Log <sub>2</sub> fold change in normalized anti-V-antigen antibody caspase-3 levels (Day 14 post-second vaccination) | 0.095<br>(0.7469)<br>[14]          |
|                                             | Log <sub>2</sub> fold change in ELISA IgG conc (Day 28 post-second vaccination)  | Log <sub>2</sub> fold change in normalized anti-V-antigen antibody caspase-3 levels (Day 28 post-second vaccination) | 0.151<br>(0.6073)<br>[14]          |
| <b>ELISA IgG titer (V antigen)</b>          | Log <sub>2</sub> fold change in ELISA IgG titer (Day 14 post-second vaccination) | Log <sub>2</sub> fold change in normalized anti-V-antigen antibody caspase-3 levels (Day 14 post-second vaccination) | 0.305<br>(0.2882)<br>[14]          |
|                                             | Log <sub>2</sub> fold change in ELISA IgG titer (Day 28 post-second vaccination) | Log <sub>2</sub> fold change in normalized anti-V-antigen antibody caspase-3 levels (Day 28 post-second vaccination) | 0.534<br>(0.0492)<br>[14]          |
| <b>ELISA IgG concentration (V antigen)</b>  | Log <sub>2</sub> fold change in ELISA IgG conc (Day 14 post-second vaccination)  | Log <sub>2</sub> fold change in normalized anti-V-antigen antibody caspase-3 levels (Day 14 post-second vaccination) | 0.253<br>(0.3828)<br>[14]          |
|                                             | Log <sub>2</sub> fold change in ELISA IgG conc (Day 28 post-second vaccination)  | Log <sub>2</sub> fold change in normalized anti-V-antigen antibody caspase-3 levels (Day 28 post-second vaccination) | 0.521<br>(0.0558)<br>[14]          |

**Supplementary Table 8:** Wilcoxon Signed Rank Test for comparing proliferating and cytokine producing T cell and cytokine stimulation index levels at Day 14 or Day 28 post-second vaccination with pre-vaccination (F1/V 10ug/ml, all treatment groups)

|                                                 | Day 14 Post-Vaccination 2 vs. Pre-Vaccination 1 |                    |         |                    | Day 28 Post-Vaccination 2 vs. Pre-Vaccination 1 |                    |         |                    |
|-------------------------------------------------|-------------------------------------------------|--------------------|---------|--------------------|-------------------------------------------------|--------------------|---------|--------------------|
|                                                 | n                                               | Wilcoxon Statistic | P-Value | Median Fold Change | n                                               | Wilcoxon Statistic | P-Value | Median Fold Change |
| <b>Proliferating Cytokine Producing T-Cells</b> |                                                 |                    |         |                    |                                                 |                    |         |                    |
| CD4+/CFSElo/IL-6+                               | 15                                              | 40                 | 0.4513  | 1                  | 14                                              | 46                 | 0.7148  | 1.01               |
| CD4+/CFSElo/IL-10+                              | 15                                              | 31                 | 0.107   | 2.12               | 14                                              | 20                 | 0.0419  | 7.43               |
| CD4+/CFSElo/IL-6/IL-10+                         | 15                                              | 11                 | >0.9999 | 1                  | 14                                              | 12                 | 0.8339  | 1                  |
| CD4+/CFSElo/IFN $\gamma$ +                      | 15                                              | 34                 | 0.1514  | 2.01               | 14                                              | 33                 | 0.2412  | 1.6                |
| CD4+/CFSElo/TNF+                                | 15                                              | 37                 | 0.2078  | 1.48               | 14                                              | 40                 | 0.4631  | 1.22               |
| CD4+/CFSElo/IFN/TNF $\alpha$ +                  | 15                                              | 36                 | 0.1876  | 1.54               | 14                                              | 21                 | 0.0494  | 1.68               |
| CD4+/CFSElo/IL-4+                               | 15                                              | 27                 | 0.2084  | 1                  | 14                                              | 8                  | 0.0294  | 2.02               |
| CD4+/CFSElo/IL-2+                               | 15                                              | 32                 | 0.3636  | 1.09               | 14                                              | 67                 | 0.1422  | 0.3                |
| CD4+/CFSElo/IL-4/IL-2+                          | 15                                              | 1                  | >0.9999 | 1                  | 14                                              | 0                  | 0.3711  | 1                  |
| CD8+/CFSElo/IL-6+                               | 15                                              | 40                 | 0.4513  | 1.78               | 14                                              | 35                 | 0.7837  | 1.19               |
| CD8+/CFSElo/IL-10+                              | 15                                              | 60                 | >0.9999 | 1.51               | 14                                              | 61                 | 0.6257  | 0.9                |
| CD8+/CFSElo/IL-10/IL-6+                         | 15                                              | 0                  | 0.1814  | 1                  | 14                                              | 2                  | >0.9999 | 1                  |
| CD8+/CFSElo/IFN $\gamma$ +                      | 15                                              | 50                 | 0.5995  | 1.05               | 14                                              | 38                 | 0.391   | 1.44               |
| CD8+/CFSElo/TNF $\alpha$ +                      | 15                                              | 84                 | 0.1876  | 0.82               | 14                                              | 59                 | 0.7148  | 0.61               |
| CD8+/CFSElo/TNF/IFN $\gamma$ +                  | 15                                              | 62                 | 0.9341  | 1.09               | 14                                              | 49                 | 0.8552  | 0.85               |
| CD8+/CFSElo/IL-4+                               | 15                                              | 62                 | 0.5721  | 0.77               | 14                                              | 44                 | 0.7241  | 1.04               |
| CD8+/CFSElo/IL-2+                               | 15                                              | 33                 | 0.1354  | 1.78               | 14                                              | 34                 | 0.442   | 1.44               |
| CD8+/CFSElo/IL-4/IL-2+                          | 15                                              | 12                 | 0.2807  | 1                  | 14                                              | 10                 | 0.5541  | 1                  |
| <b>Cytokines</b>                                |                                                 |                    |         |                    |                                                 |                    |         |                    |
| IL-17A                                          | 15                                              | 20                 | 0.0806  | 1.08               | 14                                              | 26                 | 0.3268  | 1.12               |
| IFN $\gamma$                                    | 15                                              | 18                 | 0.0151  | 1.34               | 14                                              | 40                 | 0.4631  | 1                  |
| TNF $\alpha$                                    | 15                                              | 83                 | 0.2078  | 0.72               | 14                                              | 73                 | 0.2166  | 0.5                |
| IL-10                                           | 15                                              | 68                 | 0.6788  | 1.01               | 14                                              | 72                 | 0.2412  | 0.89               |
| IL-6                                            | 15                                              | 60                 | >0.9999 | 0.99               | 14                                              | 47                 | 0.7609  | 1.18               |
| IL-4                                            | 15                                              | 0                  | NA      | 1                  | 14                                              | 0                  | NA      | 1                  |
| IL-2                                            | 15                                              | 75                 | 0.1673  | 0.96               | 14                                              | 52                 | 0.3268  | 1                  |

**Supplementary Table 9:** Spearman correlation between fold change in proliferating and cytokine producing CD4+ T cell stimulation index and change in protective antibody response

|                                                                                                                              | Spearman Correlation (p-value) [n]                                                                            |                                                                                                               |                                                                                                               |                                                                                                               |
|------------------------------------------------------------------------------------------------------------------------------|---------------------------------------------------------------------------------------------------------------|---------------------------------------------------------------------------------------------------------------|---------------------------------------------------------------------------------------------------------------|---------------------------------------------------------------------------------------------------------------|
|                                                                                                                              | CD4+/CFSElo/IL-6+ T-cells (F1/V)                                                                              |                                                                                                               | CD4+/CFSElo/IFN $\gamma$ + T-cells (F1/V)                                                                     |                                                                                                               |
|                                                                                                                              | Log <sub>2</sub> fold change in the stimulation index of proliferating cells (Day 14 post-second vaccination) | Log <sub>2</sub> fold change in the stimulation index of proliferating cells (Day 28 post-second vaccination) | Log <sub>2</sub> fold change in the stimulation index of proliferating cells (Day 14 post-second vaccination) | Log <sub>2</sub> fold change in the stimulation index of proliferating cells (Day 28 post-second vaccination) |
| Log <sub>2</sub> fold change in inverse normalized anti-V-antigen antibody Caspase-3 levels (Day 14 post-second vaccination) | -0.571<br>(0.0261)<br>[15]                                                                                    | -0.305<br>(0.2882)<br>[14]                                                                                    | -0.232<br>(0.4051)<br>[15]                                                                                    | -0.345<br>(0.2269)<br>[14]                                                                                    |
| Log <sub>2</sub> fold change in inverse normalized anti-V-antigen antibody Caspase-3 levels (Day 28 post-second vaccination) | -0.138<br>(0.6369)<br>[14]                                                                                    | -0.169<br>(0.563)<br>[14]                                                                                     | 0.244<br>(0.4006)<br>[14]                                                                                     | -0.095<br>(0.7479)<br>[14]                                                                                    |



**Supplementary Table 10:** Genes differentially expressed at day 14 post-second vaccination compared to day 0 (RNA-Seq). Sorted by descending absolute  $\log_2$  fold change (Day 14 post-second vaccination vs. Day 0). Gene model summaries and annotations are based on Ensembl Version 90 (August 2017).

| Ensembl Gene ID                 | Ensembl Gene Name | Ensembl Gene Description                                                             | Gene Type                        | $\log_2$ Fold Change (Day 14 vs. Day 0) | Average $\log_2$ CPM | Likelihood Ratio Test Statistic | P-Value | FDR Adjusted P-Value |
|---------------------------------|-------------------|--------------------------------------------------------------------------------------|----------------------------------|-----------------------------------------|----------------------|---------------------------------|---------|----------------------|
| <a href="#">ENSG00000112116</a> | IL17F             | interleukin 17F [Source:HGNC Symbol;Acc:HGNC:16404]                                  | protein coding                   | 1.23                                    | 3.96                 | 48.43                           | <0.0001 | <0.0001              |
| <a href="#">ENSG00000127318</a> | IL22              | interleukin 22 [Source:HGNC Symbol;Acc:HGNC:14900]                                   | protein coding                   | 1.18                                    | 4.84                 | 19.59                           | <0.0001 | 0.0016               |
| <a href="#">ENSG00000198848</a> | CES1              | carboxylesterase 1 [Source:HGNC Symbol;Acc:HGNC:1863]                                | protein coding                   | -0.86                                   | 5.47                 | 74.58                           | <0.0001 | <0.0001              |
| <a href="#">ENSG00000206073</a> | SERPINB4          | serpin family B member 4 [Source:HGNC Symbol;Acc:HGNC:10570]                         | protein coding                   | -0.84                                   | 4.44                 | 17.90                           | <0.0001 | 0.0025               |
| <a href="#">ENSG00000174145</a> | NWD2              | NACHT and WD repeat domain containing 2 [Source:HGNC Symbol;Acc:HGNC:29229]          | protein coding                   | -0.77                                   | 2.49                 | 15.28                           | <0.0001 | 0.0062               |
| <a href="#">ENSG00000005102</a> | MEOX1             | mesenchyme homeobox 1 [Source:HGNC Symbol;Acc:HGNC:7013]                             | protein coding                   | 0.74                                    | 1.35                 | 19.81                           | <0.0001 | 0.0015               |
| <a href="#">ENSG00000087245</a> | MMP2              | matrix metalloproteinase 2 [Source:HGNC Symbol;Acc:HGNC:7166]                        | protein coding                   | -0.70                                   | 2.60                 | 11.50                           | 0.0007  | 0.0254               |
| <a href="#">ENSG00000111537</a> | IFNG              | interferon gamma [Source:HGNC Symbol;Acc:HGNC:5438]                                  | protein coding                   | 0.68                                    | 7.07                 | 21.88                           | <0.0001 | 0.0008               |
| <a href="#">ENSG00000164647</a> | STEAP1            | STEAP family member 1 [Source:HGNC Symbol;Acc:HGNC:11378]                            | protein coding                   | -0.67                                   | 2.06                 | 12.69                           | 0.0004  | 0.0172               |
| <a href="#">ENSG00000105501</a> | SIGLEC5           | sialic acid binding Ig like lectin 5 [Source:HGNC Symbol;Acc:HGNC:10874]             | protein coding                   | -0.66                                   | 1.79                 | 24.93                           | <0.0001 | 0.0004               |
| <a href="#">ENSG00000165617</a> | DACT1             | dishevelled binding antagonist of beta catenin 1 [Source:HGNC Symbol;Acc:HGNC:17748] | protein coding                   | 0.65                                    | 2.32                 | 23.28                           | <0.0001 | 0.0006               |
| <a href="#">ENSG00000227825</a> | SLC9A7P1          | solute carrier family 9 member 7 pseudogene 1 [Source:HGNC Symbol;Acc:HGNC:32679]    | transcribed processed pseudogene | -0.64                                   | 1.90                 | 16.38                           | <0.0001 | 0.0044               |
| <a href="#">ENSG00000146072</a> | TNFRSF21          | TNF receptor superfamily member 21 [Source:HGNC Symbol;Acc:HGNC:13469]               | protein coding                   | -0.64                                   | 5.46                 | 29.77                           | <0.0001 | <0.0001              |
| <a href="#">ENSG00000171236</a> | LRG1              | leucine rich alpha-2-glycoprotein 1 [Source:HGNC Symbol;Acc:HGNC:29480]              | protein coding                   | -0.63                                   | 1.56                 | 20.88                           | <0.0001 | 0.0012               |
| <a href="#">ENSG00000136695</a> | IL36RN            | interleukin 36 receptor antagonist [Source:HGNC Symbol;Acc:HGNC:15561]               | protein coding                   | -0.63                                   | 3.78                 | 15.64                           | <0.0001 | 0.0058               |
| <a href="#">ENSG00000142224</a> | IL19              | interleukin 19 [Source:HGNC Symbol;Acc:HGNC:5990]                                    | protein coding                   | -0.63                                   | 4.27                 | 12.12                           | 0.0005  | 0.0204               |

**Supplementary Table 10:** Genes differentially expressed at day 14 post-second vaccination compared to day 0 (RNA-Seq). Sorted by descending absolute  $\log_2$  fold change (Day 14 post-second vaccination vs. Day 0). Gene model summaries and annotations are based on Ensembl Version 90 (August 2017) (continued).

| Ensembl Gene ID                 | Ensembl Gene Name | Ensembl Gene Description                                                                         | Gene Type      | $\log_2$ Fold Change (Day 14 vs. Day 0) | Average $\log_2$ CPM | Likelihood Ratio Test Statistic | P-Value | FDR Adjusted P-Value |
|---------------------------------|-------------------|--------------------------------------------------------------------------------------------------|----------------|-----------------------------------------|----------------------|---------------------------------|---------|----------------------|
| <a href="#">ENSG00000087116</a> | ADAMTS2           | ADAM metalloproteinase with thrombospondin type 1 motif 2 [Source:HGNC Symbol;Acc:HGNC:218]      | protein coding | -0.63                                   | 1.64                 | 15.78                           | <0.0001 | 0.0056               |
| <a href="#">ENSG00000164266</a> | SPINK1            | serine peptidase inhibitor, Kazal type 1 [Source:HGNC Symbol;Acc:HGNC:11244]                     | protein coding | -0.61                                   | 1.55                 | 13.55                           | 0.0002  | 0.0121               |
| <a href="#">ENSG00000183019</a> | MCEMP1            | mast cell expressed membrane protein 1 [Source:HGNC Symbol;Acc:HGNC:27291]                       | protein coding | -0.61                                   | 3.42                 | 21.93                           | <0.0001 | 0.0008               |
| <a href="#">ENSG00000179241</a> | LDLRAD3           | low density lipoprotein receptor class A domain containing 3 [Source:HGNC Symbol;Acc:HGNC:27046] | protein coding | -0.60                                   | 4.76                 | 22.82                           | <0.0001 | 0.0007               |
| <a href="#">ENSG00000162897</a> | FCAMR             | Fc fragment of IgA and IgM receptor [Source:HGNC Symbol;Acc:HGNC:24692]                          | protein coding | -0.59                                   | 2.71                 | 13.87                           | 0.0002  | 0.0109               |
| <a href="#">ENSG00000275385</a> | CCL18             | C-C motif chemokine ligand 18 [Source:HGNC Symbol;Acc:HGNC:10616]                                | protein coding | -0.59                                   | 4.87                 | 18.52                           | <0.0001 | 0.002                |
| <a href="#">ENSG00000211890</a> | IGHA2             | immunoglobulin heavy constant alpha 2 (A2m marker) [Source:HGNC Symbol;Acc:HGNC:5479]            | IG C gene      | 0.58                                    | 5.84                 | 10.29                           | 0.0013  | 0.038                |
| <a href="#">ENSG00000172551</a> | MUCL1             | mucin like 1 [Source:HGNC Symbol;Acc:HGNC:30588]                                                 | protein coding | -0.57                                   | 3.41                 | 19.40                           | <0.0001 | 0.0017               |
| <a href="#">ENSG00000224596</a> | ZMIZ1-AS1         | ZMIZ1 antisense RNA 1 [Source:HGNC Symbol;Acc:HGNC:27433]                                        | antisense RNA  | -0.56                                   | 2.59                 | 13.21                           | 0.0003  | 0.0139               |
| <a href="#">ENSG00000186827</a> | TNFRSF4           | TNF receptor superfamily member 4 [Source:HGNC Symbol;Acc:HGNC:11918]                            | protein coding | 0.56                                    | 5.57                 | 20.27                           | <0.0001 | 0.0014               |
| <a href="#">ENSG00000140090</a> | SLC24A4           | solute carrier family 24 member 4 [Source:HGNC Symbol;Acc:HGNC:10978]                            | protein coding | -0.55                                   | 1.58                 | 16.10                           | <0.0001 | 0.0049               |
| <a href="#">ENSG00000109099</a> | PMP22             | peripheral myelin protein 22 [Source:HGNC Symbol;Acc:HGNC:9118]                                  | protein coding | -0.55                                   | 4.90                 | 17.90                           | <0.0001 | 0.0025               |
| <a href="#">ENSG00000169245</a> | CXCL10            | C-X-C motif chemokine ligand 10 [Source:HGNC Symbol;Acc:HGNC:10637]                              | protein coding | 0.54                                    | 5.81                 | 11.19                           | 0.0008  | 0.0285               |
| <a href="#">ENSG00000213694</a> | S1PR3             | sphingosine-1-phosphate receptor 3 [Source:HGNC Symbol;Acc:HGNC:3167]                            | protein coding | -0.54                                   | 2.08                 | 16.58                           | <0.0001 | 0.004                |
| <a href="#">ENSG00000172322</a> | CLEC12A           | C-type lectin domain family 12 member A [Source:HGNC Symbol;Acc:HGNC:31713]                      | protein coding | -0.54                                   | 1.70                 | 21.95                           | <0.0001 | 0.0008               |
| <a href="#">ENSG00000074410</a> | CA12              | carbonic anhydrase 12 [Source:HGNC Symbol;Acc:HGNC:1371]                                         | protein coding | -0.54                                   | 6.64                 | 19.66                           | <0.0001 | 0.0016               |

**Supplementary Table 10:** Genes differentially expressed at day 14 post-second vaccination compared to day 0 (RNA-Seq). Sorted by descending absolute  $\log_2$  fold change (Day 14 post-second vaccination vs. Day 0). Gene model summaries and annotations are based on Ensembl Version 90 (August 2017) (continued).

| Ensembl Gene ID                 | Ensembl Gene Name | Ensembl Gene Description                                                                                     | Gene Type      | $\log_2$ Fold Change (Day 14 vs. Day 0) | Average $\log_2$ CPM | Likelihood Ratio Test Statistic | P-Value | FDR Adjusted P-Value |
|---------------------------------|-------------------|--------------------------------------------------------------------------------------------------------------|----------------|-----------------------------------------|----------------------|---------------------------------|---------|----------------------|
| <a href="#">ENSG00000174705</a> | SH3PXD2B          | SH3 and PX domains 2B [Source:HGNC Symbol;Acc:HGNC:29242]                                                    | protein coding | -0.54                                   | 7.13                 | 19.13                           | <0.0001 | 0.0017               |
| <a href="#">ENSG00000136235</a> | GPNMB             | glycoprotein nmb [Source:HGNC Symbol;Acc:HGNC:4462]                                                          | protein coding | -0.54                                   | 3.08                 | 14.84                           | 0.0001  | 0.0074               |
| <a href="#">ENSG00000145936</a> | KCNMB1            | potassium calcium-activated channel subfamily M regulatory beta subunit 1 [Source:HGNC Symbol;Acc:HGNC:6285] | protein coding | -0.53                                   | 2.14                 | 16.66                           | <0.0001 | 0.0039               |
| <a href="#">ENSG00000211640</a> | IGLV6-57          | immunoglobulin lambda variable 6-57 [Source:HGNC Symbol;Acc:HGNC:5927]                                       | IG V gene      | 0.53                                    | 1.61                 | 15.38                           | <0.0001 | 0.0059               |
| <a href="#">ENSG00000143185</a> | XCL2              | X-C motif chemokine ligand 2 [Source:HGNC Symbol;Acc:HGNC:10646]                                             | protein coding | 0.52                                    | 2.77                 | 14.21                           | 0.0002  | 0.0095               |
| <a href="#">ENSG00000173391</a> | OLR1              | oxidized low density lipoprotein receptor 1 [Source:HGNC Symbol;Acc:HGNC:8133]                               | protein coding | -0.52                                   | 6.11                 | 10.08                           | 0.0015  | 0.0408               |
| <a href="#">ENSG00000164400</a> | CSF2              | colony stimulating factor 2 [Source:HGNC Symbol;Acc:HGNC:2434]                                               | protein coding | 0.52                                    | 3.29                 | 14.26                           | 0.0002  | 0.0093               |
| <a href="#">ENSG00000165474</a> | GJB2              | gap junction protein beta 2 [Source:HGNC Symbol;Acc:HGNC:4284]                                               | protein coding | -0.51                                   | 7.58                 | 42.49                           | <0.0001 | <0.0001              |
| <a href="#">ENSG00000164125</a> | FAM198B           | family with sequence similarity 198 member B [Source:HGNC Symbol;Acc:HGNC:25312]                             | protein coding | -0.51                                   | 2.37                 | 14.76                           | 0.0001  | 0.0076               |
| <a href="#">ENSG00000108342</a> | CSF3              | colony stimulating factor 3 [Source:HGNC Symbol;Acc:HGNC:2438]                                               | protein coding | -0.51                                   | 7.90                 | 16.76                           | <0.0001 | 0.0038               |
| <a href="#">ENSG00000128342</a> | LIF               | LIF, interleukin 6 family cytokine [Source:HGNC Symbol;Acc:HGNC:6596]                                        | protein coding | 0.50                                    | 3.24                 | 12.55                           | 0.0004  | 0.018                |
| <a href="#">ENSG00000154856</a> | APCDD1            | APC down-regulated 1 [Source:HGNC Symbol;Acc:HGNC:15718]                                                     | protein coding | -0.50                                   | 4.30                 | 21.63                           | <0.0001 | 0.0009               |
| <a href="#">ENSG00000169122</a> | FAM110B           | family with sequence similarity 110 member B [Source:HGNC Symbol;Acc:HGNC:28587]                             | protein coding | -0.50                                   | 1.83                 | 14.48                           | 0.0001  | 0.0086               |
| <a href="#">ENSG00000169908</a> | TM4SF1            | transmembrane 4 L six family member 1 [Source:HGNC Symbol;Acc:HGNC:11853]                                    | protein coding | -0.50                                   | 4.57                 | 10.39                           | 0.0013  | 0.0368               |
| <a href="#">ENSG00000099985</a> | OSM               | oncostatin M [Source:HGNC Symbol;Acc:HGNC:8506]                                                              | protein coding | -0.50                                   | 7.69                 | 21.96                           | <0.0001 | 0.0008               |
| <a href="#">ENSG00000145649</a> | GZMA              | granzyme A [Source:HGNC Symbol;Acc:HGNC:4708]                                                                | protein coding | 0.50                                    | 5.54                 | 13.87                           | 0.0002  | 0.0109               |

**Supplementary Table 10:** Genes differentially expressed at day 14 post-second vaccination compared to day 0 (RNA-Seq). Sorted by descending absolute  $\log_2$  fold change (Day 14 post-second vaccination vs. Day 0). Gene model summaries and annotations are based on Ensembl Version 90 (August 2017) (continued).

| Ensembl Gene ID                 | Ensembl Gene Name | Ensembl Gene Description                                                      | Gene Type      | $\log_2$ Fold Change (Day 14 vs. Day 0) | Average $\log_2$ CPM | Likelihood Ratio Test Statistic | P-Value | FDR Adjusted P-Value |
|---------------------------------|-------------------|-------------------------------------------------------------------------------|----------------|-----------------------------------------|----------------------|---------------------------------|---------|----------------------|
| <a href="#">ENSG00000128578</a> | STRIP2            | striatin interacting protein 2 [Source:HGNC Symbol;Acc:HGNC:22209]            | protein coding | -0.49                                   | 3.49                 | 24.18                           | <0.0001 | 0.0005               |
| <a href="#">ENSG00000270550</a> | IGHV3-30          | immunoglobulin heavy variable 3-30 [Source:HGNC Symbol;Acc:HGNC:5591]         | IG V gene      | 0.49                                    | 1.96                 | 12.13                           | 0.0005  | 0.0204               |
| <a href="#">ENSG00000014257</a> | ACPP              | acid phosphatase, prostate [Source:HGNC Symbol;Acc:HGNC:125]                  | protein coding | -0.49                                   | 1.74                 | 10.84                           | 0.001   | 0.0316               |
| <a href="#">ENSG00000179431</a> | FJX1              | four jointed box 1 [Source:HGNC Symbol;Acc:HGNC:17166]                        | protein coding | -0.49                                   | 4.12                 | 13.29                           | 0.0003  | 0.0135               |
| <a href="#">ENSG00000114737</a> | CISH              | cytokine inducible SH2 containing protein [Source:HGNC Symbol;Acc:HGNC:1984]  | protein coding | 0.49                                    | 5.25                 | 23.80                           | <0.0001 | 0.0005               |
| <a href="#">ENSG00000211653</a> | IGLV1-40          | immunoglobulin lambda variable 1-40 [Source:HGNC Symbol;Acc:HGNC:5877]        | IG V gene      | 0.48                                    | 2.59                 | 9.99                            | 0.0016  | 0.0424               |
| <a href="#">ENSG00000260314</a> | MRC1              | mannose receptor C-type 1 [Source:HGNC Symbol;Acc:HGNC:7228]                  | protein coding | -0.48                                   | 1.77                 | 12.85                           | 0.0003  | 0.0161               |
| <a href="#">ENSG00000162494</a> | LRRC38            | leucine rich repeat containing 38 [Source:HGNC Symbol;Acc:HGNC:27005]         | protein coding | -0.48                                   | 2.05                 | 14.85                           | 0.0001  | 0.0074               |
| <a href="#">ENSG00000148344</a> | PTGES             | prostaglandin E synthase [Source:HGNC Symbol;Acc:HGNC:9599]                   | protein coding | -0.48                                   | 6.55                 | 10.60                           | 0.0011  | 0.0345               |
| <a href="#">ENSG00000143184</a> | XCL1              | X-C motif chemokine ligand 1 [Source:HGNC Symbol;Acc:HGNC:10645]              | protein coding | 0.47                                    | 2.22                 | 11.00                           | 0.0009  | 0.03                 |
| <a href="#">ENSG00000011422</a> | PLAUR             | plasminogen activator, urokinase receptor [Source:HGNC Symbol;Acc:HGNC:9053]  | protein coding | -0.47                                   | 10.08                | 19.88                           | <0.0001 | 0.0015               |
| <a href="#">ENSG00000183347</a> | GBP6              | guanylate binding protein family member 6 [Source:HGNC Symbol;Acc:HGNC:25395] | protein coding | 0.47                                    | 1.44                 | 12.64                           | 0.0004  | 0.0175               |
| <a href="#">ENSG00000136634</a> | IL10              | interleukin 10 [Source:HGNC Symbol;Acc:HGNC:5962]                             | protein coding | -0.47                                   | 6.07                 | 17.84                           | <0.0001 | 0.0025               |
| <a href="#">ENSG00000112394</a> | SLC16A10          | solute carrier family 16 member 10 [Source:HGNC Symbol;Acc:HGNC:17027]        | protein coding | -0.47                                   | 6.86                 | 21.42                           | <0.0001 | 0.001                |
| <a href="#">ENSG00000102471</a> | NDFIP2            | Nedd4 family interacting protein 2 [Source:HGNC Symbol;Acc:HGNC:18537]        | protein coding | 0.47                                    | 3.57                 | 21.27                           | <0.0001 | 0.001                |
| <a href="#">ENSG00000112715</a> | VEGFA             | vascular endothelial growth factor A [Source:HGNC Symbol;Acc:HGNC:12680]      | protein coding | -0.46                                   | 6.42                 | 25.22                           | <0.0001 | 0.0004               |
| <a href="#">ENSG00000018280</a> | SLC11A1           | solute carrier family 11 member 1 [Source:HGNC Symbol;Acc:HGNC:10907]         | protein coding | -0.46                                   | 8.70                 | 18.56                           | <0.0001 | 0.002                |

**Supplementary Table 10:** Genes differentially expressed at day 14 post-second vaccination compared to day 0 (RNA-Seq). Sorted by descending absolute  $\log_2$  fold change (Day 14 post-second vaccination vs. Day 0). Gene model summaries and annotations are based on Ensembl Version 90 (August 2017) (continued).

| Ensembl Gene ID                 | Ensembl Gene Name | Ensembl Gene Description                                                                             | Gene Type      | $\log_2$ Fold Change (Day 14 vs. Day 0) | Average $\log_2$ CPM | Likelihood Ratio Test Statistic | P-Value | FDR Adjusted P-Value |
|---------------------------------|-------------------|------------------------------------------------------------------------------------------------------|----------------|-----------------------------------------|----------------------|---------------------------------|---------|----------------------|
| <a href="#">ENSG00000252010</a> | SCARNA5           | small Cajal body-specific RNA 5 [Source:HGNC Symbol;Acc:HGNC:32561]                                  | scaRNA         | 0.46                                    | 5.65                 | 16.13                           | <0.0001 | 0.0048               |
| <a href="#">ENSG00000134830</a> | C5AR2             | complement component 5a receptor 2 [Source:HGNC Symbol;Acc:HGNC:4527]                                | protein coding | -0.46                                   | 2.48                 | 11.33                           | 0.0008  | 0.0269               |
| <a href="#">ENSG00000136689</a> | IL1RN             | interleukin 1 receptor antagonist [Source:HGNC Symbol;Acc:HGNC:6000]                                 | protein coding | -0.46                                   | 8.69                 | 22.26                           | <0.0001 | 0.0008               |
| <a href="#">ENSG00000136379</a> | ABHD17C           | abhydrolase domain containing 17C [Source:HGNC Symbol;Acc:HGNC:26925]                                | protein coding | -0.46                                   | 5.32                 | 34.94                           | <0.0001 | <0.0001              |
| <a href="#">ENSG00000014914</a> | MTMR11            | myotubularin related protein 11 [Source:HGNC Symbol;Acc:HGNC:24307]                                  | protein coding | -0.46                                   | 2.48                 | 15.42                           | <0.0001 | 0.0059               |
| <a href="#">ENSG00000139354</a> | GAS2L3            | growth arrest specific 2 like 3 [Source:HGNC Symbol;Acc:HGNC:27475]                                  | protein coding | -0.46                                   | 2.47                 | 10.90                           | 0.001   | 0.0311               |
| <a href="#">ENSG00000183307</a> | TMEM121B          | transmembrane protein 121B [Source:HGNC Symbol;Acc:HGNC:1844]                                        | protein coding | -0.46                                   | 2.03                 | 10.46                           | 0.0012  | 0.0363               |
| <a href="#">ENSG00000145555</a> | MYO10             | myosin X [Source:HGNC Symbol;Acc:HGNC:7593]                                                          | protein coding | -0.46                                   | 3.64                 | 20.20                           | <0.0001 | 0.0014               |
| <a href="#">ENSG00000249173</a> | LINC01093         | long intergenic non-protein coding RNA 1093 [Source:HGNC Symbol;Acc:HGNC:49218]                      | lincRNA        | -0.46                                   | 2.06                 | 13.51                           | 0.0002  | 0.0123               |
| <a href="#">ENSG00000243440</a> |                   |                                                                                                      | protein coding | -0.45                                   | 2.34                 | 10.38                           | 0.0013  | 0.0368               |
| <a href="#">ENSG00000073712</a> | FERMT2            | fermitin family member 2 [Source:HGNC Symbol;Acc:HGNC:15767]                                         | protein coding | -0.45                                   | 4.60                 | 34.27                           | <0.0001 | <0.0001              |
| <a href="#">ENSG00000153071</a> | DAB2              | DAB2, clathrin adaptor protein [Source:HGNC Symbol;Acc:HGNC:2662]                                    | protein coding | -0.45                                   | 5.40                 | 25.15                           | <0.0001 | 0.0004               |
| <a href="#">ENSG00000162493</a> | PDPN              | podoplanin [Source:HGNC Symbol;Acc:HGNC:29602]                                                       | protein coding | -0.45                                   | 5.71                 | 10.96                           | 0.0009  | 0.0304               |
| <a href="#">ENSG00000226979</a> | LTA               | lymphotoxin alpha [Source:HGNC Symbol;Acc:HGNC:6709]                                                 | protein coding | 0.45                                    | 4.14                 | 14.92                           | 0.0001  | 0.0071               |
| <a href="#">ENSG00000198682</a> | PAPSS2            | 3'-phosphoadenosine 5'-phosphosulfate synthase 2 [Source:HGNC Symbol;Acc:HGNC:8604]                  | protein coding | -0.45                                   | 6.01                 | 25.22                           | <0.0001 | 0.0004               |
| <a href="#">ENSG00000142185</a> | TRPM2             | transient receptor potential cation channel subfamily M member 2 [Source:HGNC Symbol;Acc:HGNC:12339] | protein coding | -0.44                                   | 6.04                 | 23.09                           | <0.0001 | 0.0006               |
| <a href="#">ENSG00000123689</a> | G0S2              | G0/G1 switch 2 [Source:HGNC Symbol;Acc:HGNC:30229]                                                   | protein coding | -0.44                                   | 7.34                 | 17.98                           | <0.0001 | 0.0024               |

**Supplementary Table 10:** Genes differentially expressed at day 14 post-second vaccination compared to day 0 (RNA-Seq). Sorted by descending absolute  $\log_2$  fold change (Day 14 post-second vaccination vs. Day 0). Gene model summaries and annotations are based on Ensembl Version 90 (August 2017) (continued).

| Ensembl Gene ID                 | Ensembl Gene Name | Ensembl Gene Description                                                            | Gene Type      | $\log_2$ Fold Change (Day 14 vs. Day 0) | Average $\log_2$ CPM | Likelihood Ratio Test Statistic | P-Value | FDR Adjusted P-Value |
|---------------------------------|-------------------|-------------------------------------------------------------------------------------|----------------|-----------------------------------------|----------------------|---------------------------------|---------|----------------------|
| <a href="#">ENSG00000236939</a> | BAALC-AS2         | BAALC antisense RNA 2 [Source:HGNC Symbol;Acc:HGNC:28595]                           | antisense RNA  | -0.44                                   | 1.89                 | 11.76                           | 0.0006  | 0.0233               |
| <a href="#">ENSG00000124216</a> | SNAI1             | snail family transcriptional repressor 1 [Source:HGNC Symbol;Acc:HGNC:11128]        | protein coding | -0.44                                   | 2.98                 | 15.58                           | <0.0001 | 0.0058               |
| <a href="#">ENSG00000225342</a> |                   |                                                                                     | antisense RNA  | 0.44                                    | 1.18                 | 10.54                           | 0.0012  | 0.0353               |
| <a href="#">ENSG00000106853</a> | PTGR1             | prostaglandin reductase 1 [Source:HGNC Symbol;Acc:HGNC:18429]                       | protein coding | -0.44                                   | 3.50                 | 18.94                           | <0.0001 | 0.0018               |
| <a href="#">ENSG00000254415</a> | SIGLEC14          | sialic acid binding Ig like lectin 14 [Source:HGNC Symbol;Acc:HGNC:32926]           | protein coding | -0.44                                   | 6.45                 | 31.57                           | <0.0001 | <0.0001              |
| <a href="#">ENSG00000143226</a> | FCGR2A            | Fc fragment of IgG receptor IIa [Source:HGNC Symbol;Acc:HGNC:3616]                  | protein coding | -0.44                                   | 7.06                 | 17.08                           | <0.0001 | 0.0034               |
| <a href="#">ENSG00000185052</a> | SLC24A3           | solute carrier family 24 member 3 [Source:HGNC Symbol;Acc:HGNC:10977]               | protein coding | -0.43                                   | 3.49                 | 11.03                           | 0.0009  | 0.0298               |
| <a href="#">ENSG00000250274</a> |                   |                                                                                     | lincRNA        | -0.43                                   | 2.66                 | 13.20                           | 0.0003  | 0.0139               |
| <a href="#">ENSG00000008394</a> | MGST1             | microsomal glutathione S-transferase 1 [Source:HGNC Symbol;Acc:HGNC:7061]           | protein coding | -0.43                                   | 3.76                 | 18.86                           | <0.0001 | 0.0019               |
| <a href="#">ENSG00000115594</a> | IL1R1             | interleukin 1 receptor type 1 [Source:HGNC Symbol;Acc:HGNC:5993]                    | protein coding | -0.43                                   | 6.20                 | 23.82                           | <0.0001 | 0.0005               |
| <a href="#">ENSG00000250929</a> | LINC01181         | long intergenic non-protein coding RNA 1181 [Source:HGNC Symbol;Acc:HGNC:25533]     | antisense RNA  | -0.43                                   | 1.90                 | 13.63                           | 0.0002  | 0.012                |
| <a href="#">ENSG00000115107</a> | STEAP3            | STEAP3 metalloproteinase [Source:HGNC Symbol;Acc:HGNC:24592]                        | protein coding | -0.43                                   | 4.94                 | 16.87                           | <0.0001 | 0.0036               |
| <a href="#">ENSG00000072840</a> | EVC               | EvC ciliary complex subunit 1 [Source:HGNC Symbol;Acc:HGNC:3497]                    | protein coding | -0.43                                   | 2.42                 | 10.90                           | 0.001   | 0.0311               |
| <a href="#">ENSG00000035862</a> | TIMP2             | TIMP metalloproteinase inhibitor 2 [Source:HGNC Symbol;Acc:HGNC:11821]              | protein coding | -0.43                                   | 4.65                 | 23.75                           | <0.0001 | 0.0005               |
| <a href="#">ENSG00000002587</a> | HS3ST1            | heparan sulfate-glucosamine 3-sulfotransferase 1 [Source:HGNC Symbol;Acc:HGNC:5194] | protein coding | -0.43                                   | 5.04                 | 11.69                           | 0.0006  | 0.024                |
| <a href="#">ENSG00000166396</a> | SERPINB7          | serpin family B member 7 [Source:HGNC Symbol;Acc:HGNC:13902]                        | protein coding | -0.43                                   | 7.25                 | 13.98                           | 0.0002  | 0.0106               |
| <a href="#">ENSG00000171631</a> | P2RY6             | pyrimidinergic receptor P2Y6 [Source:HGNC Symbol;Acc:HGNC:8543]                     | protein coding | -0.42                                   | 4.59                 | 12.37                           | 0.0004  | 0.0189               |
| <a href="#">ENSG00000111424</a> | VDR               | vitamin D receptor [Source:HGNC Symbol;Acc:HGNC:12679]                              | protein coding | -0.42                                   | 5.88                 | 16.73                           | <0.0001 | 0.0038               |

**Supplementary Table 10:** Genes differentially expressed at day 14 post-second vaccination compared to day 0 (RNA-Seq). Sorted by descending absolute  $\log_2$  fold change (Day 14 post-second vaccination vs. Day 0). Gene model summaries and annotations are based on Ensembl Version 90 (August 2017) (continued).

| Ensembl Gene ID                 | Ensembl Gene Name | Ensembl Gene Description                                                                 | Gene Type      | $\log_2$ Fold Change (Day 14 vs. Day 0) | Average $\log_2$ CPM | Likelihood Ratio Test Statistic | P-Value | FDR Adjusted P-Value |
|---------------------------------|-------------------|------------------------------------------------------------------------------------------|----------------|-----------------------------------------|----------------------|---------------------------------|---------|----------------------|
| <a href="#">ENSG00000110079</a> | MS4A4A            | membrane spanning 4-domains A4A [Source:HGNC Symbol;Acc:HGNC:13371]                      | protein coding | -0.42                                   | 2.89                 | 12.00                           | 0.0005  | 0.0215               |
| <a href="#">ENSG00000183762</a> | KREMEN1           | kringle containing transmembrane protein 1 [Source:HGNC Symbol;Acc:HGNC:17550]           | protein coding | -0.42                                   | 6.55                 | 13.02                           | 0.0003  | 0.015                |
| <a href="#">ENSG00000103569</a> | AQP9              | aquaporin 9 [Source:HGNC Symbol;Acc:HGNC:643]                                            | protein coding | -0.42                                   | 9.57                 | 16.87                           | <0.0001 | 0.0036               |
| <a href="#">ENSG00000125810</a> | CD93              | CD93 molecule [Source:HGNC Symbol;Acc:HGNC:15855]                                        | protein coding | -0.42                                   | 9.73                 | 19.86                           | <0.0001 | 0.0015               |
| <a href="#">ENSG00000051128</a> | HOMER3            | homer scaffolding protein 3 [Source:HGNC Symbol;Acc:HGNC:17514]                          | protein coding | -0.42                                   | 3.06                 | 18.31                           | <0.0001 | 0.0022               |
| <a href="#">ENSG00000103888</a> | CEMIP             | cell migration inducing hyaluronan binding protein [Source:HGNC Symbol;Acc:HGNC:29213]   | protein coding | -0.42                                   | 9.85                 | 9.66                            | 0.0019  | 0.0477               |
| <a href="#">ENSG00000100767</a> | PAPLN             | papilin, proteoglycan like sulfated glycoprotein [Source:HGNC Symbol;Acc:HGNC:19262]     | protein coding | -0.42                                   | 4.63                 | 16.32                           | <0.0001 | 0.0045               |
| <a href="#">ENSG00000100292</a> | HMOX1             | heme oxygenase 1 [Source:HGNC Symbol;Acc:HGNC:5013]                                      | protein coding | -0.42                                   | 7.24                 | 18.74                           | <0.0001 | 0.0019               |
| <a href="#">ENSG00000167850</a> | CD300C            | CD300c molecule [Source:HGNC Symbol;Acc:HGNC:19320]                                      | protein coding | -0.41                                   | 3.90                 | 16.40                           | <0.0001 | 0.0044               |
| <a href="#">ENSG00000172594</a> | SMPDL3A           | sphingomyelin phosphodiesterase acid like 3A [Source:HGNC Symbol;Acc:HGNC:17389]         | protein coding | -0.41                                   | 6.79                 | 14.34                           | 0.0002  | 0.0091               |
| <a href="#">ENSG00000116962</a> | NID1              | nidogen 1 [Source:HGNC Symbol;Acc:HGNC:7821]                                             | protein coding | -0.41                                   | 4.30                 | 23.32                           | <0.0001 | 0.0006               |
| <a href="#">ENSG00000101188</a> | NTSR1             | neurotensin receptor 1 [Source:HGNC Symbol;Acc:HGNC:8039]                                | protein coding | -0.41                                   | 1.79                 | 10.10                           | 0.0015  | 0.0406               |
| <a href="#">ENSG00000169860</a> | P2RY1             | purinergic receptor P2Y1 [Source:HGNC Symbol;Acc:HGNC:8539]                              | protein coding | -0.41                                   | 2.58                 | 18.09                           | <0.0001 | 0.0024               |
| <a href="#">ENSG00000165480</a> | SKA3              | spindle and kinetochore associated complex subunit 3 [Source:HGNC Symbol;Acc:HGNC:20262] | protein coding | -0.41                                   | 1.67                 | 10.75                           | 0.001   | 0.0327               |
| <a href="#">ENSG00000224397</a> | SMIM25            | small integral membrane protein 25 [Source:HGNC Symbol;Acc:HGNC:50328]                   | lincRNA        | -0.41                                   | 4.47                 | 15.61                           | <0.0001 | 0.0058               |
| <a href="#">ENSG00000170458</a> | CD14              | CD14 molecule [Source:HGNC Symbol;Acc:HGNC:1628]                                         | protein coding | -0.41                                   | 9.90                 | 10.34                           | 0.0013  | 0.0375               |
| <a href="#">ENSG00000137331</a> | IER3              | immediate early response 3 [Source:HGNC Symbol;Acc:HGNC:5392]                            | protein coding | -0.41                                   | 10.06                | 15.45                           | <0.0001 | 0.0059               |

**Supplementary Table 10:** Genes differentially expressed at day 14 post-second vaccination compared to day 0 (RNA-Seq). Sorted by descending absolute  $\log_2$  fold change (Day 14 post-second vaccination vs. Day 0). Gene model summaries and annotations are based on Ensembl Version 90 (August 2017) (continued).

| Ensembl Gene ID                 | Ensembl Gene Name | Ensembl Gene Description                                                             | Gene Type      | $\log_2$ Fold Change (Day 14 vs. Day 0) | Average $\log_2$ CPM | Likelihood Ratio Test Statistic | P-Value | FDR Adjusted P-Value |
|---------------------------------|-------------------|--------------------------------------------------------------------------------------|----------------|-----------------------------------------|----------------------|---------------------------------|---------|----------------------|
| <a href="#">ENSG00000189060</a> | H1F0              | H1 histone family member 0 [Source:HGNC Symbol;Acc:HGNC:4714]                        | protein coding | -0.41                                   | 5.32                 | 20.46                           | <0.0001 | 0.0013               |
| <a href="#">ENSG00000100504</a> | PYGL              | glycogen phosphorylase L [Source:HGNC Symbol;Acc:HGNC:9725]                          | protein coding | -0.41                                   | 5.47                 | 10.58                           | 0.0011  | 0.0348               |
| <a href="#">ENSG00000178726</a> | THBD              | thrombomodulin [Source:HGNC Symbol;Acc:HGNC:11784]                                   | protein coding | -0.40                                   | 5.39                 | 16.98                           | <0.0001 | 0.0034               |
| <a href="#">ENSG00000204161</a> | C10orf128         | chromosome 10 open reading frame 128 [Source:HGNC Symbol;Acc:HGNC:27274]             | protein coding | 0.40                                    | 3.38                 | 13.56                           | 0.0002  | 0.0121               |
| <a href="#">ENSG00000167680</a> | SEMA6B            | semaphorin 6B [Source:HGNC Symbol;Acc:HGNC:10739]                                    | protein coding | -0.40                                   | 7.93                 | 20.27                           | <0.0001 | 0.0014               |
| <a href="#">ENSG00000124104</a> | SNX21             | sorting nexin family member 21 [Source:HGNC Symbol;Acc:HGNC:16154]                   | protein coding | -0.40                                   | 3.20                 | 25.01                           | <0.0001 | 0.0004               |
| <a href="#">ENSG00000129450</a> | SIGLEC9           | sialic acid binding Ig like lectin 9 [Source:HGNC Symbol;Acc:HGNC:10878]             | protein coding | -0.40                                   | 6.22                 | 21.00                           | <0.0001 | 0.0011               |
| <a href="#">ENSG00000196878</a> | LAMB3             | laminin subunit beta 3 [Source:HGNC Symbol;Acc:HGNC:6490]                            | protein coding | -0.40                                   | 5.51                 | 18.82                           | <0.0001 | 0.0019               |
| <a href="#">ENSG00000150510</a> | FAM124A           | family with sequence similarity 124 member A [Source:HGNC Symbol;Acc:HGNC:26413]     | protein coding | -0.40                                   | 4.45                 | 18.49                           | <0.0001 | 0.002                |
| <a href="#">ENSG00000105976</a> | MET               | MET proto-oncogene, receptor tyrosine kinase [Source:HGNC Symbol;Acc:HGNC:7029]      | protein coding | -0.40                                   | 8.30                 | 15.16                           | <0.0001 | 0.0064               |
| <a href="#">ENSG00000124731</a> | TREM1             | triggering receptor expressed on myeloid cells 1 [Source:HGNC Symbol;Acc:HGNC:17760] | protein coding | -0.40                                   | 8.02                 | 20.22                           | <0.0001 | 0.0014               |
| <a href="#">ENSG00000258376</a> |                   |                                                                                      | antisense RNA  | -0.40                                   | 2.71                 | 12.61                           | 0.0004  | 0.0176               |
| <a href="#">ENSG00000175352</a> | NRIP3             | nuclear receptor interacting protein 3 [Source:HGNC Symbol;Acc:HGNC:1167]            | protein coding | -0.39                                   | 5.62                 | 22.89                           | <0.0001 | 0.0007               |
| <a href="#">ENSG00000095383</a> | TBC1D2            | TBC1 domain family member 2 [Source:HGNC Symbol;Acc:HGNC:18026]                      | protein coding | -0.39                                   | 5.65                 | 37.58                           | <0.0001 | <0.0001              |
| <a href="#">ENSG00000204822</a> | MRPL53            | mitochondrial ribosomal protein L53 [Source:HGNC Symbol;Acc:HGNC:16684]              | protein coding | 0.39                                    | 1.61                 | 10.41                           | 0.0013  | 0.0368               |
| <a href="#">ENSG00000181790</a> | ADGRB1            | adhesion G protein-coupled receptor B1 [Source:HGNC Symbol;Acc:HGNC:943]             | protein coding | -0.39                                   | 2.64                 | 10.06                           | 0.0015  | 0.0411               |
| <a href="#">ENSG00000171476</a> | HOPX              | HOP homeobox [Source:HGNC Symbol;Acc:HGNC:24961]                                     | protein coding | 0.39                                    | 4.15                 | 10.40                           | 0.0013  | 0.0368               |



**Supplementary Table 10:** Genes differentially expressed at day 14 post-second vaccination compared to day 0 (RNA-Seq). Sorted by descending absolute  $\log_2$  fold change (Day 14 post-second vaccination vs. Day 0). Gene model summaries and annotations are based on Ensembl Version 90 (August 2017) (continued).

| Ensembl Gene ID                 | Ensembl Gene Name | Ensembl Gene Description                                                        | Gene Type      | $\log_2$ Fold Change (Day 14 vs. Day 0) | Average $\log_2$ CPM | Likelihood Ratio Test Statistic | P-Value | FDR Adjusted P-Value |
|---------------------------------|-------------------|---------------------------------------------------------------------------------|----------------|-----------------------------------------|----------------------|---------------------------------|---------|----------------------|
| <a href="#">ENSG00000198853</a> | RUSC2             | RUN and SH3 domain containing 2 [Source:HGNC Symbol;Acc:HGNC:23625]             | protein coding | -0.39                                   | 5.90                 | 25.75                           | <0.0001 | 0.0004               |
| <a href="#">ENSG00000165029</a> | ABCA1             | ATP binding cassette subfamily A member 1 [Source:HGNC Symbol;Acc:HGNC:29]      | protein coding | -0.38                                   | 9.57                 | 11.62                           | 0.0007  | 0.0244               |
| <a href="#">ENSG00000273443</a> |                   |                                                                                 | lincRNA        | -0.38                                   | 1.27                 | 9.98                            | 0.0016  | 0.0427               |
| <a href="#">ENSG00000121743</a> | GJA3              | gap junction protein alpha 3 [Source:HGNC Symbol;Acc:HGNC:4277]                 | protein coding | -0.38                                   | 5.35                 | 22.77                           | <0.0001 | 0.0007               |
| <a href="#">ENSG00000158869</a> | FCER1G            | Fc fragment of IgE receptor Ig [Source:HGNC Symbol;Acc:HGNC:3611]               | protein coding | -0.38                                   | 9.35                 | 12.33                           | 0.0004  | 0.0191               |
| <a href="#">ENSG00000050730</a> | TNIP3             | TNFAIP3 interacting protein 3 [Source:HGNC Symbol;Acc:HGNC:19315]               | protein coding | -0.38                                   | 8.39                 | 18.97                           | <0.0001 | 0.0018               |
| <a href="#">ENSG00000153558</a> | FBXL2             | F-box and leucine rich repeat protein 2 [Source:HGNC Symbol;Acc:HGNC:13598]     | protein coding | 0.38                                    | 1.32                 | 10.66                           | 0.0011  | 0.0337               |
| <a href="#">ENSG00000267737</a> |                   |                                                                                 | lincRNA        | -0.38                                   | 2.39                 | 10.94                           | 0.0009  | 0.0307               |
| <a href="#">ENSG00000123342</a> | MMP19             | matrix metalloproteinase 19 [Source:HGNC Symbol;Acc:HGNC:7165]                  | protein coding | -0.38                                   | 7.41                 | 25.24                           | <0.0001 | 0.0004               |
| <a href="#">ENSG00000180113</a> | TDRD6             | tudor domain containing 6 [Source:HGNC Symbol;Acc:HGNC:21339]                   | protein coding | -0.38                                   | 5.28                 | 16.16                           | <0.0001 | 0.0048               |
| <a href="#">ENSG00000104974</a> | LILRA1            | leukocyte immunoglobulin like receptor A1 [Source:HGNC Symbol;Acc:HGNC:6602]    | protein coding | -0.38                                   | 6.43                 | 12.80                           | 0.0003  | 0.0164               |
| <a href="#">ENSG00000182010</a> | RTKN2             | rhotekin 2 [Source:HGNC Symbol;Acc:HGNC:19364]                                  | protein coding | 0.38                                    | 3.35                 | 17.83                           | <0.0001 | 0.0025               |
| <a href="#">ENSG00000116574</a> | RHOU              | ras homolog family member U [Source:HGNC Symbol;Acc:HGNC:17794]                 | protein coding | -0.38                                   | 6.80                 | 31.18                           | <0.0001 | <0.0001              |
| <a href="#">ENSG00000171517</a> | LPAR3             | lysophosphatidic acid receptor 3 [Source:HGNC Symbol;Acc:HGNC:14298]            | protein coding | -0.38                                   | 3.94                 | 13.88                           | 0.0002  | 0.0109               |
| <a href="#">ENSG00000139926</a> | FRMD6             | FERM domain containing 6 [Source:HGNC Symbol;Acc:HGNC:19839]                    | protein coding | -0.37                                   | 2.35                 | 11.45                           | 0.0007  | 0.0256               |
| <a href="#">ENSG00000146674</a> | IGFBP3            | insulin like growth factor binding protein 3 [Source:HGNC Symbol;Acc:HGNC:5472] | protein coding | 0.37                                    | 2.88                 | 10.01                           | 0.0016  | 0.042                |
| <a href="#">ENSG00000213977</a> | TAX1BP3           | Tax1 binding protein 3 [Source:HGNC Symbol;Acc:HGNC:30684]                      | protein coding | -0.37                                   | 1.89                 | 10.24                           | 0.0014  | 0.0387               |
| <a href="#">ENSG00000184371</a> | CSF1              | colony stimulating factor 1 [Source:HGNC Symbol;Acc:HGNC:2432]                  | protein coding | 0.37                                    | 4.46                 | 17.92                           | <0.0001 | 0.0025               |

**Supplementary Table 10:** Genes differentially expressed at day 14 post-second vaccination compared to day 0 (RNA-Seq). Sorted by descending absolute  $\log_2$  fold change (Day 14 post-second vaccination vs. Day 0). Gene model summaries and annotations are based on Ensembl Version 90 (August 2017) (continued).

| Ensembl Gene ID                 | Ensembl Gene Name | Ensembl Gene Description                                                                      | Gene Type      | $\log_2$ Fold Change (Day 14 vs. Day 0) | Average $\log_2$ CPM | Likelihood Ratio Test Statistic | P-Value | FDR Adjusted P-Value |
|---------------------------------|-------------------|-----------------------------------------------------------------------------------------------|----------------|-----------------------------------------|----------------------|---------------------------------|---------|----------------------|
| <a href="#">ENSG00000152213</a> | ARL11             | ADP ribosylation factor like GTPase 11 [Source:HGNC Symbol;Acc:HGNC:24046]                    | protein coding | -0.37                                   | 2.36                 | 15.74                           | <0.0001 | 0.0056               |
| <a href="#">ENSG00000117090</a> | SLAMF1            | signaling lymphocytic activation molecule family member 1 [Source:HGNC Symbol;Acc:HGNC:10903] | protein coding | -0.37                                   | 8.05                 | 22.87                           | <0.0001 | 0.0007               |
| <a href="#">ENSG00000198719</a> | DLL1              | delta like canonical Notch ligand 1 [Source:HGNC Symbol;Acc:HGNC:2908]                        | protein coding | -0.37                                   | 5.04                 | 24.94                           | <0.0001 | 0.0004               |
| <a href="#">ENSG00000128274</a> | A4GALT            | alpha 1,4-galactosyltransferase (P blood group) [Source:HGNC Symbol;Acc:HGNC:18149]           | protein coding | -0.37                                   | 3.49                 | 9.70                            | 0.0018  | 0.0471               |
| <a href="#">ENSG00000075391</a> | RASAL2            | RAS protein activator like 2 [Source:HGNC Symbol;Acc:HGNC:9874]                               | protein coding | -0.37                                   | 3.22                 | 11.87                           | 0.0006  | 0.0224               |
| <a href="#">ENSG00000107249</a> | GLIS3             | GLIS family zinc finger 3 [Source:HGNC Symbol;Acc:HGNC:28510]                                 | protein coding | -0.37                                   | 5.55                 | 11.79                           | 0.0006  | 0.023                |
| <a href="#">ENSG00000090674</a> | MCOLN1            | mucolipin 1 [Source:HGNC Symbol;Acc:HGNC:13356]                                               | protein coding | -0.36                                   | 3.52                 | 26.34                           | <0.0001 | 0.0003               |
| <a href="#">ENSG00000070731</a> | ST6GALNAC2        | ST6 N-acetylgalactosaminide alpha-2,6-sialyltransferase 2 [Source:HGNC Symbol;Acc:HGNC:10867] | protein coding | -0.36                                   | 2.33                 | 16.74                           | <0.0001 | 0.0038               |
| <a href="#">ENSG00000138061</a> | CYP1B1            | cytochrome P450 family 1 subfamily B member 1 [Source:HGNC Symbol;Acc:HGNC:2597]              | protein coding | -0.36                                   | 8.63                 | 13.06                           | 0.0003  | 0.0148               |
| <a href="#">ENSG00000020181</a> | ADGRA2            | adhesion G protein-coupled receptor A2 [Source:HGNC Symbol;Acc:HGNC:17849]                    | protein coding | -0.36                                   | 5.06                 | 19.87                           | <0.0001 | 0.0015               |
| <a href="#">ENSG00000197249</a> | SERPINA1          | serpin family A member 1 [Source:HGNC Symbol;Acc:HGNC:8941]                                   | protein coding | -0.36                                   | 9.36                 | 11.84                           | 0.0006  | 0.0227               |
| <a href="#">ENSG00000120162</a> | MOB3B             | MOB kinase activator 3B [Source:HGNC Symbol;Acc:HGNC:23825]                                   | protein coding | -0.36                                   | 3.16                 | 20.08                           | <0.0001 | 0.0014               |
| <a href="#">ENSG00000167613</a> | LAIR1             | leukocyte associated immunoglobulin like receptor 1 [Source:HGNC Symbol;Acc:HGNC:6477]        | protein coding | -0.36                                   | 8.19                 | 15.86                           | <0.0001 | 0.0054               |
| <a href="#">ENSG00000114315</a> | HES1              | hes family bHLH transcription factor 1 [Source:HGNC Symbol;Acc:HGNC:5192]                     | protein coding | -0.36                                   | 3.97                 | 15.54                           | <0.0001 | 0.0058               |
| <a href="#">ENSG00000125730</a> | C3                | complement C3 [Source:HGNC Symbol;Acc:HGNC:1318]                                              | protein coding | -0.36                                   | 6.94                 | 20.75                           | <0.0001 | 0.0012               |
| <a href="#">ENSG00000198053</a> | SIRPA             | signal regulatory protein alpha [Source:HGNC Symbol;Acc:HGNC:9662]                            | protein coding | -0.36                                   | 7.27                 | 19.82                           | <0.0001 | 0.0015               |

**Supplementary Table 10:** Genes differentially expressed at day 14 post-second vaccination compared to day 0 (RNA-Seq). Sorted by descending absolute  $\log_2$  fold change (Day 14 post-second vaccination vs. Day 0). Gene model summaries and annotations are based on Ensembl Version 90 (August 2017) (continued).

| Ensembl Gene ID                 | Ensembl Gene Name | Ensembl Gene Description                                                                | Gene Type      | $\log_2$ Fold Change (Day 14 vs. Day 0) | Average $\log_2$ CPM | Likelihood Ratio Test Statistic | P-Value | FDR Adjusted P-Value |
|---------------------------------|-------------------|-----------------------------------------------------------------------------------------|----------------|-----------------------------------------|----------------------|---------------------------------|---------|----------------------|
| <a href="#">ENSG00000105509</a> | HAS1              | hyaluronan synthase 1 [Source:HGNC Symbol;Acc:HGNC:4818]                                | protein coding | -0.36                                   | 7.00                 | 15.19                           | <0.0001 | 0.0064               |
| <a href="#">ENSG00000075651</a> | PLD1              | phospholipase D1 [Source:HGNC Symbol;Acc:HGNC:9067]                                     | protein coding | -0.36                                   | 6.67                 | 17.10                           | <0.0001 | 0.0034               |
| <a href="#">ENSG00000168329</a> | CX3CR1            | C-X3-C motif chemokine receptor 1 [Source:HGNC Symbol;Acc:HGNC:2558]                    | protein coding | 0.36                                    | 2.35                 | 10.52                           | 0.0012  | 0.0356               |
| <a href="#">ENSG00000127838</a> | PNKD              | paroxysmal nonkinesigenic dyskinesia [Source:HGNC Symbol;Acc:HGNC:9153]                 | protein coding | -0.36                                   | 6.63                 | 18.73                           | <0.0001 | 0.0019               |
| <a href="#">ENSG00000175489</a> | LRRC25            | leucine rich repeat containing 25 [Source:HGNC Symbol;Acc:HGNC:29806]                   | protein coding | -0.36                                   | 8.53                 | 13.88                           | 0.0002  | 0.0109               |
| <a href="#">ENSG00000143067</a> | ZNF697            | zinc finger protein 697 [Source:HGNC Symbol;Acc:HGNC:32034]                             | protein coding | -0.36                                   | 4.88                 | 15.72                           | <0.0001 | 0.0056               |
| <a href="#">ENSG00000128218</a> | VPREB3            | V-set pre-B cell surrogate light chain 3 [Source:HGNC Symbol;Acc:HGNC:12710]            | protein coding | 0.36                                    | 2.39                 | 9.87                            | 0.0017  | 0.0441               |
| <a href="#">ENSG00000148926</a> | ADM               | adrenomedullin [Source:HGNC Symbol;Acc:HGNC:259]                                        | protein coding | -0.36                                   | 7.47                 | 16.98                           | <0.0001 | 0.0034               |
| <a href="#">ENSG00000181019</a> | NQO1              | NAD(P)H quinone dehydrogenase 1 [Source:HGNC Symbol;Acc:HGNC:2874]                      | protein coding | -0.36                                   | 4.34                 | 16.64                           | <0.0001 | 0.0039               |
| <a href="#">ENSG00000073792</a> | IGF2BP2           | insulin like growth factor 2 mRNA binding protein 2 [Source:HGNC Symbol;Acc:HGNC:28867] | protein coding | -0.35                                   | 2.40                 | 12.49                           | 0.0004  | 0.0183               |
| <a href="#">ENSG00000135636</a> | DYSF              | dysferlin [Source:HGNC Symbol;Acc:HGNC:3097]                                            | protein coding | -0.35                                   | 4.83                 | 11.11                           | 0.0009  | 0.0293               |
| <a href="#">ENSG00000103855</a> | CD276             | CD276 molecule [Source:HGNC Symbol;Acc:HGNC:19137]                                      | protein coding | -0.35                                   | 5.14                 | 14.48                           | 0.0001  | 0.0086               |
| <a href="#">ENSG00000239998</a> | LILRA2            | leukocyte immunoglobulin like receptor A2 [Source:HGNC Symbol;Acc:HGNC:6603]            | protein coding | -0.35                                   | 6.61                 | 12.57                           | 0.0004  | 0.0178               |
| <a href="#">ENSG00000109674</a> | NEIL3             | nei like DNA glycosylase 3 [Source:HGNC Symbol;Acc:HGNC:24573]                          | protein coding | -0.35                                   | 3.42                 | 11.43                           | 0.0007  | 0.0258               |
| <a href="#">ENSG00000127507</a> | ADGRE2            | adhesion G protein-coupled receptor E2 [Source:HGNC Symbol;Acc:HGNC:3337]               | protein coding | -0.35                                   | 7.13                 | 12.95                           | 0.0003  | 0.0154               |
| <a href="#">ENSG00000122861</a> | PLAU              | plasminogen activator, urokinase [Source:HGNC Symbol;Acc:HGNC:9052]                     | protein coding | -0.35                                   | 5.46                 | 19.13                           | <0.0001 | 0.0017               |
| <a href="#">ENSG00000165886</a> | UBTD1             | ubiquitin domain containing 1 [Source:HGNC Symbol;Acc:HGNC:25683]                       | protein coding | -0.35                                   | 3.87                 | 15.14                           | <0.0001 | 0.0065               |

**Supplementary Table 10:** Genes differentially expressed at day 14 post-second vaccination compared to day 0 (RNA-Seq). Sorted by descending absolute  $\log_2$  fold change (Day 14 post-second vaccination vs. Day 0). Gene model summaries and annotations are based on Ensembl Version 90 (August 2017) (continued).

| Ensembl Gene ID                 | Ensembl Gene Name | Ensembl Gene Description                                                                | Gene Type      | $\log_2$ Fold Change (Day 14 vs. Day 0) | Average $\log_2$ CPM | Likelihood Ratio Test Statistic | P-Value | FDR Adjusted P-Value |
|---------------------------------|-------------------|-----------------------------------------------------------------------------------------|----------------|-----------------------------------------|----------------------|---------------------------------|---------|----------------------|
| <a href="#">ENSG00000132669</a> | RIN2              | Ras and Rab interactor 2 [Source:HGNC Symbol;Acc:HGNC:18750]                            | protein coding | -0.35                                   | 8.08                 | 18.68                           | <0.0001 | 0.0019               |
| <a href="#">ENSG00000168995</a> | SIGLEC7           | sialic acid binding Ig like lectin 7 [Source:HGNC Symbol;Acc:HGNC:10876]                | protein coding | -0.35                                   | 3.68                 | 11.65                           | 0.0006  | 0.0241               |
| <a href="#">ENSG00000143162</a> | CREG1             | cellular repressor of E1A stimulated genes 1 [Source:HGNC Symbol;Acc:HGNC:2351]         | protein coding | -0.35                                   | 8.43                 | 18.09                           | <0.0001 | 0.0024               |
| <a href="#">ENSG00000243649</a> | CFB               | complement factor B [Source:HGNC Symbol;Acc:HGNC:1037]                                  | protein coding | -0.35                                   | 4.13                 | 12.37                           | 0.0004  | 0.0189               |
| <a href="#">ENSG00000186818</a> | LILRB4            | leukocyte immunoglobulin like receptor B4 [Source:HGNC Symbol;Acc:HGNC:6608]            | protein coding | -0.35                                   | 8.40                 | 12.25                           | 0.0005  | 0.0196               |
| <a href="#">ENSG00000163235</a> | TGFA              | transforming growth factor alpha [Source:HGNC Symbol;Acc:HGNC:11765]                    | protein coding | -0.35                                   | 6.06                 | 22.37                           | <0.0001 | 0.0008               |
| <a href="#">ENSG00000079308</a> | TNS1              | tensin 1 [Source:HGNC Symbol;Acc:HGNC:11973]                                            | protein coding | -0.35                                   | 4.54                 | 9.92                            | 0.0016  | 0.0434               |
| <a href="#">ENSG00000153823</a> | PID1              | phosphotyrosine interaction domain containing 1 [Source:HGNC Symbol;Acc:HGNC:26084]     | protein coding | -0.35                                   | 7.21                 | 10.80                           | 0.001   | 0.0321               |
| <a href="#">ENSG00000143545</a> | RAB13             | RAB13, member RAS oncogene family [Source:HGNC Symbol;Acc:HGNC:9762]                    | protein coding | -0.35                                   | 5.22                 | 11.03                           | 0.0009  | 0.0298               |
| <a href="#">ENSG00000168461</a> | RAB31             | RAB31, member RAS oncogene family [Source:HGNC Symbol;Acc:HGNC:9771]                    | protein coding | -0.35                                   | 7.81                 | 18.82                           | <0.0001 | 0.0019               |
| <a href="#">ENSG00000138448</a> | ITGAV             | integrin subunit alpha V [Source:HGNC Symbol;Acc:HGNC:6150]                             | protein coding | -0.34                                   | 8.06                 | 13.56                           | 0.0002  | 0.0121               |
| <a href="#">ENSG00000197405</a> | C5AR1             | complement C5a receptor 1 [Source:HGNC Symbol;Acc:HGNC:1338]                            | protein coding | -0.34                                   | 8.36                 | 13.61                           | 0.0002  | 0.012                |
| <a href="#">ENSG00000104043</a> | ATP8B4            | ATPase phospholipid transporting 8B4 (putative) [Source:HGNC Symbol;Acc:HGNC:13536]     | protein coding | -0.34                                   | 4.05                 | 16.98                           | <0.0001 | 0.0034               |
| <a href="#">ENSG00000170909</a> | OSCAR             | osteoclast associated, immunoglobulin-like receptor [Source:HGNC Symbol;Acc:HGNC:29960] | protein coding | -0.34                                   | 5.82                 | 20.19                           | <0.0001 | 0.0014               |
| <a href="#">ENSG00000059728</a> | MXD1              | MAX dimerization protein 1 [Source:HGNC Symbol;Acc:HGNC:6761]                           | protein coding | -0.34                                   | 8.54                 | 14.76                           | 0.0001  | 0.0076               |
| <a href="#">ENSG00000167703</a> | SLC43A2           | solute carrier family 43 member 2 [Source:HGNC Symbol;Acc:HGNC:23087]                   | protein coding | -0.34                                   | 9.78                 | 9.96                            | 0.0016  | 0.0429               |
| <a href="#">ENSG00000233058</a> | LINC00884         | long intergenic non-protein coding RNA 884 [Source:HGNC Symbol;Acc:HGNC:48570]          | antisense RNA  | -0.34                                   | 3.56                 | 15.62                           | <0.0001 | 0.0058               |

**Supplementary Table 10:** Genes differentially expressed at day 14 post-second vaccination compared to day 0 (RNA-Seq). Sorted by descending absolute  $\log_2$  fold change (Day 14 post-second vaccination vs. Day 0). Gene model summaries and annotations are based on Ensembl Version 90 (August 2017) (continued).

| Ensembl Gene ID                 | Ensembl Gene Name | Ensembl Gene Description                                                           | Gene Type              | $\log_2$ Fold Change (Day 14 vs. Day 0) | Average $\log_2$ CPM | Likelihood Ratio Test Statistic | P-Value | FDR Adjusted P-Value |
|---------------------------------|-------------------|------------------------------------------------------------------------------------|------------------------|-----------------------------------------|----------------------|---------------------------------|---------|----------------------|
| <a href="#">ENSG00000147650</a> | LRP12             | LDL receptor related protein 12 [Source:HGNC Symbol;Acc:HGNC:31708]                | protein coding         | -0.34                                   | 4.82                 | 19.22                           | <0.0001 | 0.0017               |
| <a href="#">ENSG00000268734</a> |                   |                                                                                    | lincRNA                | -0.34                                   | 4.71                 | 11.04                           | 0.0009  | 0.0298               |
| <a href="#">ENSG0000011186</a>  | WNT5B             | Wnt family member 5B [Source:HGNC Symbol;Acc:HGNC:16265]                           | protein coding         | -0.34                                   | 2.47                 | 10.96                           | 0.0009  | 0.0304               |
| <a href="#">ENSG00000105928</a> | DFNA5             | DFNA5, deafness associated tumor suppressor [Source:HGNC Symbol;Acc:HGNC:2810]     | protein coding         | -0.34                                   | 5.94                 | 20.00                           | <0.0001 | 0.0015               |
| <a href="#">ENSG00000204577</a> | LILRB3            | leukocyte immunoglobulin like receptor B3 [Source:HGNC Symbol;Acc:HGNC:6607]       | protein coding         | -0.34                                   | 6.28                 | 13.25                           | 0.0003  | 0.0137               |
| <a href="#">ENSG00000215861</a> |                   |                                                                                    | unprocessed pseudogene | -0.34                                   | 4.14                 | 11.64                           | 0.0006  | 0.0242               |
| <a href="#">ENSG00000256235</a> | SMIM3             | small integral membrane protein 3 [Source:HGNC Symbol;Acc:HGNC:30248]              | protein coding         | -0.34                                   | 6.49                 | 24.65                           | <0.0001 | 0.0004               |
| <a href="#">ENSG00000261618</a> |                   |                                                                                    | lincRNA                | -0.34                                   | 4.18                 | 11.01                           | 0.0009  | 0.03                 |
| <a href="#">ENSG00000146070</a> | PLA2G7            | phospholipase A2 group VII [Source:HGNC Symbol;Acc:HGNC:9040]                      | protein coding         | -0.34                                   | 8.24                 | 14.50                           | 0.0001  | 0.0086               |
| <a href="#">ENSG00000121316</a> | PLBD1             | phospholipase B domain containing 1 [Source:HGNC Symbol;Acc:HGNC:26215]            | protein coding         | -0.34                                   | 2.42                 | 10.17                           | 0.0014  | 0.0395               |
| <a href="#">ENSG00000173918</a> | C1QTNF1           | C1q and TNF related 1 [Source:HGNC Symbol;Acc:HGNC:14324]                          | protein coding         | -0.33                                   | 7.83                 | 14.61                           | 0.0001  | 0.0081               |
| <a href="#">ENSG00000074964</a> | ARHGEF10L         | Rho guanine nucleotide exchange factor 10 like [Source:HGNC Symbol;Acc:HGNC:25540] | protein coding         | -0.33                                   | 7.34                 | 17.11                           | <0.0001 | 0.0034               |
| <a href="#">ENSG00000052795</a> | FNIP2             | folliculin interacting protein 2 [Source:HGNC Symbol;Acc:HGNC:29280]               | protein coding         | -0.33                                   | 7.80                 | 20.24                           | <0.0001 | 0.0014               |
| <a href="#">ENSG00000105520</a> | PLPPR2            | phospholipid phosphatase related 2 [Source:HGNC Symbol;Acc:HGNC:29566]             | protein coding         | -0.33                                   | 3.32                 | 10.17                           | 0.0014  | 0.0395               |
| <a href="#">ENSG00000169439</a> | SDC2              | syndecan 2 [Source:HGNC Symbol;Acc:HGNC:10659]                                     | protein coding         | -0.33                                   | 8.42                 | 13.50                           | 0.0002  | 0.0123               |
| <a href="#">ENSG00000120129</a> | DUSP1             | dual specificity phosphatase 1 [Source:HGNC Symbol;Acc:HGNC:3064]                  | protein coding         | -0.33                                   | 9.86                 | 12.03                           | 0.0005  | 0.0214               |
| <a href="#">ENSG00000196923</a> | PDLIM7            | PDZ and LIM domain 7 [Source:HGNC Symbol;Acc:HGNC:22958]                           | protein coding         | -0.33                                   | 4.84                 | 28.68                           | <0.0001 | 0.0001               |
| <a href="#">ENSG00000088826</a> | SMOX              | spermine oxidase [Source:HGNC Symbol;Acc:HGNC:15862]                               | protein coding         | -0.33                                   | 5.29                 | 16.31                           | <0.0001 | 0.0045               |

**Supplementary Table 10:** Genes differentially expressed at day 14 post-second vaccination compared to day 0 (RNA-Seq). Sorted by descending absolute  $\log_2$  fold change (Day 14 post-second vaccination vs. Day 0). Gene model summaries and annotations are based on Ensembl Version 90 (August 2017) (continued).

| Ensembl Gene ID                 | Ensembl Gene Name | Ensembl Gene Description                                                                    | Gene Type      | $\log_2$ Fold Change (Day 14 vs. Day 0) | Average $\log_2$ CPM | Likelihood Ratio Test Statistic | P-Value | FDR Adjusted P-Value |
|---------------------------------|-------------------|---------------------------------------------------------------------------------------------|----------------|-----------------------------------------|----------------------|---------------------------------|---------|----------------------|
| <a href="#">ENSG00000140022</a> | STON2             | stonin 2 [Source:HGNC Symbol;Acc:HGNC:30652]                                                | protein coding | -0.33                                   | 3.42                 | 10.18                           | 0.0014  | 0.0395               |
| <a href="#">ENSG00000146094</a> | DOK3              | docking protein 3 [Source:HGNC Symbol;Acc:HGNC:24583]                                       | protein coding | -0.33                                   | 5.96                 | 21.97                           | <0.0001 | 0.0008               |
| <a href="#">ENSG00000123610</a> | TNFAIP6           | TNF alpha induced protein 6 [Source:HGNC Symbol;Acc:HGNC:11898]                             | protein coding | -0.33                                   | 8.71                 | 11.90                           | 0.0006  | 0.0223               |
| <a href="#">ENSG00000164929</a> | BAALC             | BAALC, MAP3K1 and KLF4 binding [Source:HGNC Symbol;Acc:HGNC:14333]                          | protein coding | -0.33                                   | 3.56                 | 11.01                           | 0.0009  | 0.03                 |
| <a href="#">ENSG00000108950</a> | FAM20A            | FAM20A, golgi associated secretory pathway pseudokinase [Source:HGNC Symbol;Acc:HGNC:23015] | protein coding | -0.33                                   | 5.77                 | 10.82                           | 0.001   | 0.0319               |
| <a href="#">ENSG00000136098</a> | NEK3              | NIMA related kinase 3 [Source:HGNC Symbol;Acc:HGNC:7746]                                    | protein coding | -0.33                                   | 2.69                 | 10.29                           | 0.0013  | 0.038                |
| <a href="#">ENSG00000091073</a> | DTX2              | deltex E3 ubiquitin ligase 2 [Source:HGNC Symbol;Acc:HGNC:15973]                            | protein coding | -0.33                                   | 4.79                 | 18.97                           | <0.0001 | 0.0018               |
| <a href="#">ENSG00000166825</a> | ANPEP             | alanyl aminopeptidase, membrane [Source:HGNC Symbol;Acc:HGNC:500]                           | protein coding | -0.33                                   | 8.86                 | 14.36                           | 0.0002  | 0.0091               |
| <a href="#">ENSG00000176170</a> | SPHK1             | sphingosine kinase 1 [Source:HGNC Symbol;Acc:HGNC:11240]                                    | protein coding | -0.33                                   | 6.93                 | 14.27                           | 0.0002  | 0.0093               |
| <a href="#">ENSG00000186431</a> | FCAR              | Fc fragment of IgA receptor [Source:HGNC Symbol;Acc:HGNC:3608]                              | protein coding | -0.32                                   | 6.63                 | 15.53                           | <0.0001 | 0.0058               |
| <a href="#">ENSG00000139572</a> | GPR84             | G protein-coupled receptor 84 [Source:HGNC Symbol;Acc:HGNC:4535]                            | protein coding | -0.32                                   | 6.85                 | 11.90                           | 0.0006  | 0.0223               |
| <a href="#">ENSG00000189233</a> | NUGGC             | nuclear GTPase, germinal center associated [Source:HGNC Symbol;Acc:HGNC:33550]              | protein coding | 0.32                                    | 2.36                 | 11.12                           | 0.0009  | 0.0293               |
| <a href="#">ENSG00000099250</a> | NRP1              | neuropilin 1 [Source:HGNC Symbol;Acc:HGNC:8004]                                             | protein coding | -0.32                                   | 6.61                 | 15.24                           | <0.0001 | 0.0063               |
| <a href="#">ENSG00000130202</a> | NECTIN2           | nectin cell adhesion molecule 2 [Source:HGNC Symbol;Acc:HGNC:9707]                          | protein coding | -0.32                                   | 7.56                 | 9.90                            | 0.0017  | 0.0438               |
| <a href="#">ENSG00000163069</a> | SGCB              | sarcoglycan beta [Source:HGNC Symbol;Acc:HGNC:10806]                                        | protein coding | 0.32                                    | 2.30                 | 11.45                           | 0.0007  | 0.0256               |
| <a href="#">ENSG00000131042</a> | LILRB2            | leukocyte immunoglobulin like receptor B2 [Source:HGNC Symbol;Acc:HGNC:6606]                | protein coding | -0.32                                   | 8.33                 | 9.87                            | 0.0017  | 0.0441               |
| <a href="#">ENSG00000244482</a> | LILRA6            | leukocyte immunoglobulin like receptor A6 [Source:HGNC Symbol;Acc:HGNC:15495]               | protein coding | -0.32                                   | 5.57                 | 15.54                           | <0.0001 | 0.0058               |

**Supplementary Table 10:** Genes differentially expressed at day 14 post-second vaccination compared to day 0 (RNA-Seq). Sorted by descending absolute  $\log_2$  fold change (Day 14 post-second vaccination vs. Day 0). Gene model summaries and annotations are based on Ensembl Version 90 (August 2017) (continued).

| Ensembl Gene ID                 | Ensembl Gene Name | Ensembl Gene Description                                                                       | Gene Type            | $\log_2$ Fold Change (Day 14 vs. Day 0) | Average $\log_2$ CPM | Likelihood Ratio Test Statistic | P-Value | FDR Adjusted P-Value |
|---------------------------------|-------------------|------------------------------------------------------------------------------------------------|----------------------|-----------------------------------------|----------------------|---------------------------------|---------|----------------------|
| <a href="#">ENSG00000119900</a> | OGFRL1            | opioid growth factor receptor like 1 [Source:HGNC Symbol;Acc:HGNC:21378]                       | protein coding       | -0.32                                   | 7.58                 | 18.46                           | <0.0001 | 0.0021               |
| <a href="#">ENSG00000101187</a> | SLCO4A1           | solute carrier organic anion transporter family member 4A1 [Source:HGNC Symbol;Acc:HGNC:10953] | protein coding       | -0.32                                   | 7.48                 | 24.35                           | <0.0001 | 0.0005               |
| <a href="#">ENSG00000177706</a> | FAM20C            | FAM20C, golgi associated secretory pathway kinase [Source:HGNC Symbol;Acc:HGNC:22140]          | protein coding       | -0.32                                   | 3.96                 | 12.70                           | 0.0004  | 0.0172               |
| <a href="#">ENSG00000135678</a> | CPM               | carboxypeptidase M [Source:HGNC Symbol;Acc:HGNC:2311]                                          | protein coding       | -0.32                                   | 5.66                 | 13.91                           | 0.0002  | 0.0109               |
| <a href="#">ENSG00000132205</a> | EMILIN2           | elastin microfibril interfacier 2 [Source:HGNC Symbol;Acc:HGNC:19881]                          | protein coding       | -0.32                                   | 8.81                 | 13.63                           | 0.0002  | 0.012                |
| <a href="#">ENSG00000111321</a> | LTBR              | lymphotoxin beta receptor [Source:HGNC Symbol;Acc:HGNC:6718]                                   | protein coding       | -0.32                                   | 5.98                 | 19.17                           | <0.0001 | 0.0017               |
| <a href="#">ENSG00000229644</a> | NAMPTP1           | nicotinamide phosphoribosyltransferase pseudogene 1 [Source:HGNC Symbol;Acc:HGNC:17633]        | processed pseudogene | -0.31                                   | 8.43                 | 11.46                           | 0.0007  | 0.0256               |
| <a href="#">ENSG00000123411</a> | IKZF4             | IKAROS family zinc finger 4 [Source:HGNC Symbol;Acc:HGNC:13179]                                | protein coding       | 0.31                                    | 2.22                 | 11.11                           | 0.0009  | 0.0293               |
| <a href="#">ENSG00000242048</a> |                   |                                                                                                | processed transcript | -0.31                                   | 3.80                 | 10.22                           | 0.0014  | 0.039                |
| <a href="#">ENSG00000087074</a> | PPP1R15A          | protein phosphatase 1 regulatory subunit 15A [Source:HGNC Symbol;Acc:HGNC:14375]               | protein coding       | -0.31                                   | 8.71                 | 18.04                           | <0.0001 | 0.0024               |
| <a href="#">ENSG00000135404</a> | CD63              | CD63 molecule [Source:HGNC Symbol;Acc:HGNC:1692]                                               | protein coding       | -0.31                                   | 9.16                 | 10.46                           | 0.0012  | 0.0363               |
| <a href="#">ENSG00000114251</a> | WNT5A             | Wnt family member 5A [Source:HGNC Symbol;Acc:HGNC:12784]                                       | protein coding       | -0.31                                   | 5.57                 | 12.57                           | 0.0004  | 0.0178               |
| <a href="#">ENSG00000157557</a> | ETS2              | ETS proto-oncogene 2, transcription factor [Source:HGNC Symbol;Acc:HGNC:3489]                  | protein coding       | -0.31                                   | 8.46                 | 19.03                           | <0.0001 | 0.0018               |
| <a href="#">ENSG00000118971</a> | CCND2             | cyclin D2 [Source:HGNC Symbol;Acc:HGNC:1583]                                                   | protein coding       | 0.31                                    | 8.37                 | 15.77                           | <0.0001 | 0.0056               |
| <a href="#">ENSG00000131981</a> | LGALS3            | galectin 3 [Source:HGNC Symbol;Acc:HGNC:6563]                                                  | protein coding       | -0.31                                   | 7.94                 | 17.25                           | <0.0001 | 0.0032               |
| <a href="#">ENSG00000140678</a> | ITGAX             | integrin subunit alpha X [Source:HGNC Symbol;Acc:HGNC:6152]                                    | protein coding       | -0.31                                   | 7.02                 | 23.46                           | <0.0001 | 0.0006               |
| <a href="#">ENSG00000085514</a> | PILRA             | paired immunoglobulin like type 2 receptor alpha [Source:HGNC Symbol;Acc:HGNC:20396]           | protein coding       | -0.31                                   | 8.08                 | 15.62                           | <0.0001 | 0.0058               |
| <a href="#">ENSG00000136720</a> | HS6ST1            | heparan sulfate 6-O-sulfotransferase 1 [Source:HGNC Symbol;Acc:HGNC:5201]                      | protein coding       | -0.31                                   | 5.80                 | 19.51                           | <0.0001 | 0.0016               |

**Supplementary Table 10:** Genes differentially expressed at day 14 post-second vaccination compared to day 0 (RNA-Seq). Sorted by descending absolute  $\log_2$  fold change (Day 14 post-second vaccination vs. Day 0). Gene model summaries and annotations are based on Ensembl Version 90 (August 2017) (continued).

| Ensembl Gene ID                 | Ensembl Gene Name | Ensembl Gene Description                                                                 | Gene Type      | $\log_2$ Fold Change (Day 14 vs. Day 0) | Average $\log_2$ CPM | Likelihood Ratio Test Statistic | P-Value | FDR Adjusted P-Value |
|---------------------------------|-------------------|------------------------------------------------------------------------------------------|----------------|-----------------------------------------|----------------------|---------------------------------|---------|----------------------|
| <a href="#">ENSG00000160746</a> | ANO10             | anoctamin 10 [Source:HGNC Symbol;Acc:HGNC:25519]                                         | protein coding | -0.31                                   | 4.27                 | 18.78                           | <0.0001 | 0.0019               |
| <a href="#">ENSG00000113070</a> | HBEGF             | heparin binding EGF like growth factor [Source:HGNC Symbol;Acc:HGNC:3059]                | protein coding | -0.31                                   | 6.70                 | 13.21                           | 0.0003  | 0.0139               |
| <a href="#">ENSG00000140859</a> | KIFC3             | kinesin family member C3 [Source:HGNC Symbol;Acc:HGNC:6326]                              | protein coding | -0.31                                   | 6.35                 | 10.70                           | 0.0011  | 0.0332               |
| <a href="#">ENSG00000198018</a> | ENTPD7            | ectonucleoside triphosphate diphosphohydrolase 7 [Source:HGNC Symbol;Acc:HGNC:19745]     | protein coding | -0.31                                   | 4.97                 | 22.45                           | <0.0001 | 0.0008               |
| <a href="#">ENSG00000100284</a> | TOM1              | target of myb1 membrane trafficking protein [Source:HGNC Symbol;Acc:HGNC:11982]          | protein coding | -0.31                                   | 7.75                 | 21.31                           | <0.0001 | 0.001                |
| <a href="#">ENSG00000075131</a> | TIPIN             | TIMELESS interacting protein [Source:HGNC Symbol;Acc:HGNC:30750]                         | protein coding | 0.31                                    | 2.60                 | 9.82                            | 0.0017  | 0.0451               |
| <a href="#">ENSG00000185340</a> | GAS2L1            | growth arrest specific 2 like 1 [Source:HGNC Symbol;Acc:HGNC:16955]                      | protein coding | -0.31                                   | 3.39                 | 13.77                           | 0.0002  | 0.0113               |
| <a href="#">ENSG00000155465</a> | SLC7A7            | solute carrier family 7 member 7 [Source:HGNC Symbol;Acc:HGNC:11065]                     | protein coding | -0.30                                   | 8.55                 | 13.47                           | 0.0002  | 0.0125               |
| <a href="#">ENSG00000133805</a> | AMPD3             | adenosine monophosphate deaminase 3 [Source:HGNC Symbol;Acc:HGNC:470]                    | protein coding | -0.30                                   | 7.38                 | 24.33                           | <0.0001 | 0.0005               |
| <a href="#">ENSG00000090376</a> | IRAK3             | interleukin 1 receptor associated kinase 3 [Source:HGNC Symbol;Acc:HGNC:17020]           | protein coding | -0.30                                   | 7.54                 | 13.84                           | 0.0002  | 0.011                |
| <a href="#">ENSG00000177628</a> | GBA               | glucosylceramidase beta [Source:HGNC Symbol;Acc:HGNC:4177]                               | protein coding | -0.30                                   | 6.00                 | 13.54                           | 0.0002  | 0.0122               |
| <a href="#">ENSG00000116991</a> | SIPA1L2           | signal induced proliferation associated 1 like 2 [Source:HGNC Symbol;Acc:HGNC:23800]     | protein coding | -0.30                                   | 5.31                 | 19.51                           | <0.0001 | 0.0016               |
| <a href="#">ENSG00000198715</a> | GLMP              | glycosylated lysosomal membrane protein [Source:HGNC Symbol;Acc:HGNC:29436]              | protein coding | -0.30                                   | 5.44                 | 18.20                           | <0.0001 | 0.0023               |
| <a href="#">ENSG00000100600</a> | LGMN              | legumain [Source:HGNC Symbol;Acc:HGNC:9472]                                              | protein coding | -0.30                                   | 5.29                 | 10.51                           | 0.0012  | 0.0356               |
| <a href="#">ENSG00000267519</a> |                   |                                                                                          | lincRNA        | -0.30                                   | 2.77                 | 10.39                           | 0.0013  | 0.0368               |
| <a href="#">ENSG00000105355</a> | PLIN3             | perilipin 3 [Source:HGNC Symbol;Acc:HGNC:16893]                                          | protein coding | -0.30                                   | 6.33                 | 17.25                           | <0.0001 | 0.0032               |
| <a href="#">ENSG00000145014</a> | TMEM44            | transmembrane protein 44 [Source:HGNC Symbol;Acc:HGNC:25120]                             | protein coding | -0.30                                   | 2.88                 | 9.92                            | 0.0016  | 0.0434               |
| <a href="#">ENSG00000042286</a> | AIFM2             | apoptosis inducing factor, mitochondria associated 2 [Source:HGNC Symbol;Acc:HGNC:21411] | protein coding | -0.30                                   | 4.01                 | 15.71                           | <0.0001 | 0.0056               |



**Supplementary Table 10:** Genes differentially expressed at day 14 post-second vaccination compared to day 0 (RNA-Seq). Sorted by descending absolute  $\log_2$  fold change (Day 14 post-second vaccination vs. Day 0). Gene model summaries and annotations are based on Ensembl Version 90 (August 2017) (continued).

| Ensembl Gene ID                 | Ensembl Gene Name | Ensembl Gene Description                                                                      | Gene Type      | $\log_2$ Fold Change (Day 14 vs. Day 0) | Average $\log_2$ CPM | Likelihood Ratio Test Statistic | P-Value | FDR Adjusted P-Value |
|---------------------------------|-------------------|-----------------------------------------------------------------------------------------------|----------------|-----------------------------------------|----------------------|---------------------------------|---------|----------------------|
| <a href="#">ENSG00000091436</a> | MAP3K20           | mitogen-activated protein kinase kinase kinase 20 [Source:HGNC Symbol;Acc:HGNC:17797]         | protein coding | -0.30                                   | 6.64                 | 15.39                           | <0.0001 | 0.0059               |
| <a href="#">ENSG0000000938</a>  | FGR               | FGR proto-oncogene, Src family tyrosine kinase [Source:HGNC Symbol;Acc:HGNC:3697]             | protein coding | -0.30                                   | 7.15                 | 11.98                           | 0.0005  | 0.0216               |
| <a href="#">ENSG00000140450</a> | ARRDC4            | arrestin domain containing 4 [Source:HGNC Symbol;Acc:HGNC:28087]                              | protein coding | -0.30                                   | 5.77                 | 18.91                           | <0.0001 | 0.0018               |
| <a href="#">ENSG00000163191</a> | S100A11           | S100 calcium binding protein A11 [Source:HGNC Symbol;Acc:HGNC:10488]                          | protein coding | -0.30                                   | 6.81                 | 10.72                           | 0.0011  | 0.0329               |
| <a href="#">ENSG00000163393</a> | SLC22A15          | solute carrier family 22 member 15 [Source:HGNC Symbol;Acc:HGNC:20301]                        | protein coding | -0.30                                   | 3.10                 | 12.71                           | 0.0004  | 0.0171               |
| <a href="#">ENSG00000185697</a> | MYBL1             | MYB proto-oncogene like 1 [Source:HGNC Symbol;Acc:HGNC:7547]                                  | protein coding | 0.29                                    | 5.45                 | 19.53                           | <0.0001 | 0.0016               |
| <a href="#">ENSG00000163874</a> | ZC3H12A           | zinc finger CCCH-type containing 12A [Source:HGNC Symbol;Acc:HGNC:26259]                      | protein coding | -0.29                                   | 8.30                 | 17.30                           | <0.0001 | 0.0032               |
| <a href="#">ENSG00000149798</a> | CDC42EP2          | CDC42 effector protein 2 [Source:HGNC Symbol;Acc:HGNC:16263]                                  | protein coding | -0.29                                   | 6.25                 | 18.33                           | <0.0001 | 0.0022               |
| <a href="#">ENSG00000133612</a> | AGAP3             | ArfGAP with GTPase domain, ankyrin repeat and PH domain 3 [Source:HGNC Symbol;Acc:HGNC:16923] | protein coding | -0.29                                   | 6.82                 | 19.48                           | <0.0001 | 0.0016               |
| <a href="#">ENSG00000186522</a> | SEPT10            | septin 10 [Source:HGNC Symbol;Acc:HGNC:14349]                                                 | protein coding | -0.29                                   | 3.83                 | 10.68                           | 0.0011  | 0.0334               |
| <a href="#">ENSG00000056972</a> | TRAF3IP2          | TRAF3 interacting protein 2 [Source:HGNC Symbol;Acc:HGNC:1343]                                | protein coding | -0.29                                   | 6.40                 | 20.35                           | <0.0001 | 0.0014               |
| <a href="#">ENSG00000162817</a> | C1orf115          | chromosome 1 open reading frame 115 [Source:HGNC Symbol;Acc:HGNC:25873]                       | protein coding | -0.29                                   | 3.71                 | 12.20                           | 0.0005  | 0.02                 |
| <a href="#">ENSG00000142694</a> | EVA1B             | eva-1 homolog B [Source:HGNC Symbol;Acc:HGNC:25558]                                           | protein coding | -0.29                                   | 3.95                 | 10.43                           | 0.0012  | 0.0366               |
| <a href="#">ENSG00000147454</a> | SLC25A37          | solute carrier family 25 member 37 [Source:HGNC Symbol;Acc:HGNC:29786]                        | protein coding | -0.29                                   | 8.04                 | 12.43                           | 0.0004  | 0.0186               |
| <a href="#">ENSG00000124145</a> | SDC4              | syndecan 4 [Source:HGNC Symbol;Acc:HGNC:10661]                                                | protein coding | -0.29                                   | 6.05                 | 15.40                           | <0.0001 | 0.0059               |
| <a href="#">ENSG00000161638</a> | ITGA5             | integrin subunit alpha 5 [Source:HGNC Symbol;Acc:HGNC:6141]                                   | protein coding | -0.29                                   | 8.53                 | 13.96                           | 0.0002  | 0.0107               |

**Supplementary Table 10:** Genes differentially expressed at day 14 post-second vaccination compared to day 0 (RNA-Seq). Sorted by descending absolute  $\log_2$  fold change (Day 14 post-second vaccination vs. Day 0). Gene model summaries and annotations are based on Ensembl Version 90 (August 2017) (continued).

| Ensembl Gene ID                 | Ensembl Gene Name | Ensembl Gene Description                                                                 | Gene Type                          | $\log_2$ Fold Change (Day 14 vs. Day 0) | Average $\log_2$ CPM | Likelihood Ratio Test Statistic | P-Value | FDR Adjusted P-Value |
|---------------------------------|-------------------|------------------------------------------------------------------------------------------|------------------------------------|-----------------------------------------|----------------------|---------------------------------|---------|----------------------|
| <a href="#">ENSG00000183621</a> | ZNF438            | zinc finger protein 438 [Source:HGNC Symbol;Acc:HGNC:21029]                              | protein coding                     | -0.29                                   | 4.39                 | 17.27                           | <0.0001 | 0.0032               |
| <a href="#">ENSG00000127946</a> | HIP1              | huntingtin interacting protein 1 [Source:HGNC Symbol;Acc:HGNC:4913]                      | protein coding                     | -0.29                                   | 5.85                 | 11.53                           | 0.0007  | 0.025                |
| <a href="#">ENSG00000145685</a> | LHFPL2            | LHFPL tetraspan subfamily member 2 [Source:HGNC Symbol;Acc:HGNC:6588]                    | protein coding                     | -0.29                                   | 8.60                 | 11.53                           | 0.0007  | 0.025                |
| <a href="#">ENSG00000005238</a> | FAM214B           | family with sequence similarity 214 member B [Source:HGNC Symbol;Acc:HGNC:25666]         | protein coding                     | -0.29                                   | 6.06                 | 15.66                           | <0.0001 | 0.0058               |
| <a href="#">ENSG00000186594</a> | MIR22HG           | MIR22 host gene [Source:HGNC Symbol;Acc:HGNC:28219]                                      | lincRNA                            | -0.29                                   | 4.72                 | 20.61                           | <0.0001 | 0.0013               |
| <a href="#">ENSG00000138111</a> | MFS13A            | major facilitator superfamily domain containing 13A [Source:HGNC Symbol;Acc:HGNC:26196]  | protein coding                     | -0.28                                   | 3.61                 | 11.27                           | 0.0008  | 0.0274               |
| <a href="#">ENSG00000070614</a> | NDST1             | N-deacetylase and N-sulfotransferase 1 [Source:HGNC Symbol;Acc:HGNC:7680]                | protein coding                     | -0.28                                   | 6.02                 | 11.28                           | 0.0008  | 0.0274               |
| <a href="#">ENSG00000136026</a> | CKAP4             | cytoskeleton associated protein 4 [Source:HGNC Symbol;Acc:HGNC:16991]                    | protein coding                     | -0.28                                   | 6.99                 | 13.83                           | 0.0002  | 0.0111               |
| <a href="#">ENSG00000217801</a> |                   |                                                                                          | transcribed unprocessed pseudogene | -0.28                                   | 3.97                 | 10.20                           | 0.0014  | 0.0392               |
| <a href="#">ENSG00000125505</a> | MBOAT7            | membrane bound O-acyltransferase domain containing 7 [Source:HGNC Symbol;Acc:HGNC:15505] | protein coding                     | -0.28                                   | 7.37                 | 13.24                           | 0.0003  | 0.0137               |
| <a href="#">ENSG00000090104</a> | RGS1              | regulator of G protein signaling 1 [Source:HGNC Symbol;Acc:HGNC:9991]                    | protein coding                     | 0.28                                    | 7.22                 | 17.85                           | <0.0001 | 0.0025               |
| <a href="#">ENSG00000197208</a> | SLC22A4           | solute carrier family 22 member 4 [Source:HGNC Symbol;Acc:HGNC:10968]                    | protein coding                     | -0.28                                   | 3.09                 | 11.65                           | 0.0006  | 0.0241               |
| <a href="#">ENSG00000110880</a> | CORO1C            | coronin 1C [Source:HGNC Symbol;Acc:HGNC:2254]                                            | protein coding                     | -0.28                                   | 6.75                 | 15.54                           | <0.0001 | 0.0058               |
| <a href="#">ENSG00000075223</a> | SEMA3C            | semaphorin 3C [Source:HGNC Symbol;Acc:HGNC:10725]                                        | protein coding                     | -0.28                                   | 6.53                 | 11.88                           | 0.0006  | 0.0224               |
| <a href="#">ENSG00000197965</a> | MPZL1             | myelin protein zero like 1 [Source:HGNC Symbol;Acc:HGNC:7226]                            | protein coding                     | -0.28                                   | 6.32                 | 15.58                           | <0.0001 | 0.0058               |
| <a href="#">ENSG00000163694</a> | RBM47             | RNA binding motif protein 47 [Source:HGNC Symbol;Acc:HGNC:30358]                         | protein coding                     | -0.28                                   | 7.78                 | 12.49                           | 0.0004  | 0.0183               |

**Supplementary Table 10:** Genes differentially expressed at day 14 post-second vaccination compared to day 0 (RNA-Seq). Sorted by descending absolute  $\log_2$  fold change (Day 14 post-second vaccination vs. Day 0). Gene model summaries and annotations are based on Ensembl Version 90 (August 2017) (continued).

| Ensembl Gene ID                 | Ensembl Gene Name | Ensembl Gene Description                                                                      | Gene Type      | $\log_2$ Fold Change (Day 14 vs. Day 0) | Average $\log_2$ CPM | Likelihood Ratio Test Statistic | P-Value | FDR Adjusted P-Value |
|---------------------------------|-------------------|-----------------------------------------------------------------------------------------------|----------------|-----------------------------------------|----------------------|---------------------------------|---------|----------------------|
| <a href="#">ENSG00000176125</a> | UFSP1             | UFM1 specific peptidase 1 (inactive) [Source:HGNC Symbol;Acc:HGNC:33821]                      | protein coding | 0.28                                    | 2.05                 | 9.75                            | 0.0018  | 0.0462               |
| <a href="#">ENSG00000116017</a> | ARID3A            | AT-rich interaction domain 3A [Source:HGNC Symbol;Acc:HGNC:3031]                              | protein coding | -0.28                                   | 6.70                 | 18.35                           | <0.0001 | 0.0022               |
| <a href="#">ENSG00000030582</a> | GRN               | granulin precursor [Source:HGNC Symbol;Acc:HGNC:4601]                                         | protein coding | -0.28                                   | 8.49                 | 11.15                           | 0.0008  | 0.029                |
| <a href="#">ENSG00000159399</a> | HK2               | hexokinase 2 [Source:HGNC Symbol;Acc:HGNC:4923]                                               | protein coding | -0.28                                   | 7.24                 | 23.52                           | <0.0001 | 0.0006               |
| <a href="#">ENSG00000148834</a> | GSTO1             | glutathione S-transferase omega 1 [Source:HGNC Symbol;Acc:HGNC:13312]                         | protein coding | -0.28                                   | 7.18                 | 17.54                           | <0.0001 | 0.0029               |
| <a href="#">ENSG00000182022</a> | CHST15            | carbohydrate sulfotransferase 15 [Source:HGNC Symbol;Acc:HGNC:18137]                          | protein coding | -0.28                                   | 7.48                 | 14.67                           | 0.0001  | 0.0079               |
| <a href="#">ENSG00000136630</a> | HLX               | H2.0 like homeobox [Source:HGNC Symbol;Acc:HGNC:4978]                                         | protein coding | -0.28                                   | 6.54                 | 20.71                           | <0.0001 | 0.0012               |
| <a href="#">ENSG00000138463</a> | DIRC2             | disrupted in renal carcinoma 2 [Source:HGNC Symbol;Acc:HGNC:16628]                            | protein coding | -0.28                                   | 4.64                 | 14.20                           | 0.0002  | 0.0095               |
| <a href="#">ENSG00000134802</a> | SLC43A3           | solute carrier family 43 member 3 [Source:HGNC Symbol;Acc:HGNC:17466]                         | protein coding | -0.28                                   | 6.28                 | 21.53                           | <0.0001 | 0.001                |
| <a href="#">ENSG00000121797</a> | CCRL2             | C-C motif chemokine receptor like 2 [Source:HGNC Symbol;Acc:HGNC:1612]                        | protein coding | -0.28                                   | 6.58                 | 20.78                           | <0.0001 | 0.0012               |
| <a href="#">ENSG00000116260</a> | QSOX1             | quiescin sulfhydryl oxidase 1 [Source:HGNC Symbol;Acc:HGNC:9756]                              | protein coding | -0.28                                   | 7.43                 | 13.59                           | 0.0002  | 0.012                |
| <a href="#">ENSG00000156642</a> | NPTN              | neuroplastin [Source:HGNC Symbol;Acc:HGNC:17867]                                              | protein coding | -0.28                                   | 8.04                 | 12.24                           | 0.0005  | 0.0196               |
| <a href="#">ENSG00000139117</a> | CPNE8             | copine 8 [Source:HGNC Symbol;Acc:HGNC:23498]                                                  | protein coding | -0.27                                   | 4.18                 | 11.80                           | 0.0006  | 0.0229               |
| <a href="#">ENSG00000221883</a> | ARIH2OS           | ariadne RBR E3 ubiquitin protein ligase 2 opposite strand [Source:HGNC Symbol;Acc:HGNC:34425] | protein coding | 0.27                                    | 2.44                 | 10.21                           | 0.0014  | 0.039                |
| <a href="#">ENSG00000130766</a> | SESN2             | sestrin 2 [Source:HGNC Symbol;Acc:HGNC:20746]                                                 | protein coding | -0.27                                   | 5.65                 | 16.05                           | <0.0001 | 0.005                |
| <a href="#">ENSG00000160213</a> | CSTB              | cystatin B [Source:HGNC Symbol;Acc:HGNC:2482]                                                 | protein coding | -0.27                                   | 7.47                 | 10.29                           | 0.0013  | 0.038                |
| <a href="#">ENSG00000110848</a> | CD69              | CD69 molecule [Source:HGNC Symbol;Acc:HGNC:1694]                                              | protein coding | 0.27                                    | 6.37                 | 12.18                           | 0.0005  | 0.02                 |
| <a href="#">ENSG00000134531</a> | EMP1              | epithelial membrane protein 1 [Source:HGNC Symbol;Acc:HGNC:3333]                              | protein coding | -0.27                                   | 7.08                 | 13.74                           | 0.0002  | 0.0114               |

**Supplementary Table 10:** Genes differentially expressed at day 14 post-second vaccination compared to day 0 (RNA-Seq). Sorted by descending absolute  $\log_2$  fold change (Day 14 post-second vaccination vs. Day 0). Gene model summaries and annotations are based on Ensembl Version 90 (August 2017) (continued).

| Ensembl Gene ID                 | Ensembl Gene Name | Ensembl Gene Description                                                    | Gene Type      | $\log_2$ Fold Change (Day 14 vs. Day 0) | Average $\log_2$ CPM | Likelihood Ratio Test Statistic | P-Value | FDR Adjusted P-Value |
|---------------------------------|-------------------|-----------------------------------------------------------------------------|----------------|-----------------------------------------|----------------------|---------------------------------|---------|----------------------|
| <a href="#">ENSG00000131669</a> | NINJ1             | ninjurin 1 [Source:HGNC Symbol;Acc:HGNC:7824]                               | protein coding | -0.27                                   | 9.40                 | 9.83                            | 0.0017  | 0.0448               |
| <a href="#">ENSG00000166920</a> | C15orf48          | chromosome 15 open reading frame 48 [Source:HGNC Symbol;Acc:HGNC:29898]     | protein coding | -0.27                                   | 7.10                 | 14.32                           | 0.0002  | 0.0091               |
| <a href="#">ENSG00000167995</a> | BEST1             | bestrophin 1 [Source:HGNC Symbol;Acc:HGNC:12703]                            | protein coding | -0.27                                   | 5.35                 | 19.37                           | <0.0001 | 0.0017               |
| <a href="#">ENSG00000171791</a> | BCL2              | BCL2, apoptosis regulator [Source:HGNC Symbol;Acc:HGNC:990]                 | protein coding | 0.27                                    | 6.74                 | 22.24                           | <0.0001 | 0.0008               |
| <a href="#">ENSG0000006534</a>  | ALDH3B1           | aldehyde dehydrogenase 3 family member B1 [Source:HGNC Symbol;Acc:HGNC:410] | protein coding | -0.27                                   | 5.17                 | 12.87                           | 0.0003  | 0.016                |
| <a href="#">ENSG00000175066</a> | GK5               | glycerol kinase 5 (putative) [Source:HGNC Symbol;Acc:HGNC:28635]            | protein coding | -0.27                                   | 5.86                 | 11.41                           | 0.0007  | 0.026                |
| <a href="#">ENSG00000116701</a> | NCF2              | neutrophil cytosolic factor 2 [Source:HGNC Symbol;Acc:HGNC:7661]            | protein coding | -0.27                                   | 8.12                 | 12.65                           | 0.0004  | 0.0175               |
| <a href="#">ENSG00000213903</a> | LTB4R             | leukotriene B4 receptor [Source:HGNC Symbol;Acc:HGNC:6713]                  | protein coding | -0.27                                   | 4.38                 | 13.31                           | 0.0003  | 0.0135               |
| <a href="#">ENSG00000185033</a> | SEMA4B            | semaphorin 4B [Source:HGNC Symbol;Acc:HGNC:10730]                           | protein coding | -0.27                                   | 6.20                 | 11.58                           | 0.0007  | 0.0248               |
| <a href="#">ENSG00000106089</a> | STX1A             | syntaxin 1A [Source:HGNC Symbol;Acc:HGNC:11433]                             | protein coding | -0.27                                   | 2.84                 | 10.24                           | 0.0014  | 0.0387               |
| <a href="#">ENSG00000104763</a> | ASAH1             | N-acylsphingosine amidohydrolase 1 [Source:HGNC Symbol;Acc:HGNC:735]        | protein coding | -0.27                                   | 7.93                 | 10.56                           | 0.0012  | 0.0351               |
| <a href="#">ENSG00000110911</a> | SLC11A2           | solute carrier family 11 member 2 [Source:HGNC Symbol;Acc:HGNC:10908]       | protein coding | -0.27                                   | 6.97                 | 19.26                           | <0.0001 | 0.0017               |
| <a href="#">ENSG00000251230</a> | MIR3945HG         | MIR3945 host gene [Source:HGNC Symbol;Acc:HGNC:52002]                       | lincRNA        | -0.26                                   | 6.52                 | 15.17                           | <0.0001 | 0.0064               |
| <a href="#">ENSG00000039319</a> | ZFYVE16           | zinc finger FYVE-type containing 16 [Source:HGNC Symbol;Acc:HGNC:20756]     | protein coding | -0.26                                   | 6.69                 | 12.65                           | 0.0004  | 0.0175               |

**Supplementary Table 11:** Genes differentially expressed at day 28 post-second vaccination compared to day 0 (RNA-Seq). Sorted by descending absolute  $\log_2$  fold change (Day 28 post-second vaccination vs. Day 0). Gene model summaries and annotations are based on Ensembl Version 90 (August 2017).

| Ensembl Gene ID                 | Ensembl Gene Name | Ensembl Gene Description                                                    | Gene Type      | $\log_2$ Fold Change (Day 28 vs. Day 0) | Average $\log_2$ CPM | Likelihood Ratio Test Statistic | P-Value | FDR Adjusted P-Value |
|---------------------------------|-------------------|-----------------------------------------------------------------------------|----------------|-----------------------------------------|----------------------|---------------------------------|---------|----------------------|
| <a href="#">ENSG00000127318</a> | IL22              | interleukin 22 [Source:HGNC Symbol;Acc:HGNC:14900]                          | protein coding | 1.07                                    | 4.81                 | 32.24                           | <0.0001 | <0.0001              |
| <a href="#">ENSG00000278771</a> | RN7SL3            | RNA, 7SL, cytoplasmic 3 [Source:HGNC Symbol;Acc:HGNC:23135]                 | misc RNA       | 1.01                                    | 7.51                 | 20.25                           | <0.0001 | 0.0016               |
| <a href="#">ENSG00000206073</a> | SERPINB4          | serpin family B member 4 [Source:HGNC Symbol;Acc:HGNC:10570]                | protein coding | -0.97                                   | 4.43                 | 39.45                           | <0.0001 | <0.0001              |
| <a href="#">ENSG00000112116</a> | IL17F             | interleukin 17F [Source:HGNC Symbol;Acc:HGNC:16404]                         | protein coding | 0.97                                    | 3.82                 | 17.01                           | <0.0001 | 0.0055               |
| <a href="#">ENSG00000174145</a> | NWD2              | NACHT and WD repeat domain containing 2 [Source:HGNC Symbol;Acc:HGNC:29229] | protein coding | -0.94                                   | 2.28                 | 28.27                           | <0.0001 | 0.0001               |
| <a href="#">ENSG00000196611</a> | MMP1              | matrix metalloproteinase 1 [Source:HGNC Symbol;Acc:HGNC:7155]               | protein coding | -0.92                                   | 6.14                 | 25.65                           | <0.0001 | 0.0002               |
| <a href="#">ENSG00000131355</a> | ADGRE3            | adhesion G protein-coupled receptor E3 [Source:HGNC Symbol;Acc:HGNC:23647]  | protein coding | -0.90                                   | 2.60                 | 19.17                           | <0.0001 | 0.0025               |
| <a href="#">ENSG00000164647</a> | STEAP1            | STEAP family member 1 [Source:HGNC Symbol;Acc:HGNC:11378]                   | protein coding | -0.84                                   | 2.07                 | 14.23                           | 0.0002  | 0.0132               |
| <a href="#">ENSG00000198848</a> | CES1              | carboxylesterase 1 [Source:HGNC Symbol;Acc:HGNC:1863]                       | protein coding | -0.80                                   | 5.45                 | 49.33                           | <0.0001 | <0.0001              |
| <a href="#">ENSG00000136235</a> | GPNMB             | glycoprotein nmb [Source:HGNC Symbol;Acc:HGNC:4462]                         | protein coding | -0.80                                   | 3.04                 | 18.17                           | <0.0001 | 0.0037               |
| <a href="#">ENSG00000087245</a> | MMP2              | matrix metalloproteinase 2 [Source:HGNC Symbol;Acc:HGNC:7166]               | protein coding | -0.79                                   | 2.69                 | 16.34                           | <0.0001 | 0.0071               |
| <a href="#">ENSG00000171236</a> | LRG1              | leucine rich alpha-2-glycoprotein 1 [Source:HGNC Symbol;Acc:HGNC:29480]     | protein coding | -0.77                                   | 1.59                 | 27.82                           | <0.0001 | 0.0001               |
| <a href="#">ENSG00000109099</a> | PMP22             | peripheral myelin protein 22 [Source:HGNC Symbol;Acc:HGNC:9118]             | protein coding | -0.77                                   | 4.92                 | 29.75                           | <0.0001 | <0.0001              |
| <a href="#">ENSG00000172551</a> | MUCL1             | mucin like 1 [Source:HGNC Symbol;Acc:HGNC:30588]                            | protein coding | -0.74                                   | 3.37                 | 23.58                           | <0.0001 | 0.0006               |
| <a href="#">ENSG00000111537</a> | IFNG              | interferon gamma [Source:HGNC Symbol;Acc:HGNC:5438]                         | protein coding | 0.74                                    | 7.35                 | 12.08                           | 0.0005  | 0.0282               |
| <a href="#">ENSG00000224596</a> | ZMIZ1-AS1         | ZMIZ1 antisense RNA 1 [Source:HGNC Symbol;Acc:HGNC:27433]                   | antisense RNA  | -0.71                                   | 2.62                 | 29.14                           | <0.0001 | <0.0001              |
| <a href="#">ENSG00000275385</a> | CCL18             | C-C motif chemokine ligand 18 [Source:HGNC Symbol;Acc:HGNC:10616]           | protein coding | -0.70                                   | 4.73                 | 26.78                           | <0.0001 | 0.0001               |

**Supplementary Table 11:** Genes differentially expressed at day 28 post-second vaccination compared to day 0 (RNA-Seq). Sorted by descending absolute  $\log_2$  fold change (Day 28 post-second vaccination vs. Day 0). Gene model summaries and annotations are based on Ensembl Version 90 (August 2017) (continued).

| Ensembl Gene ID                 | Ensembl Gene Name | Ensembl Gene Description                                                                    | Gene Type      | $\log_2$ Fold Change (Day 28 vs. Day 0) | Average $\log_2$ CPM | Likelihood Ratio Test Statistic | P-Value | FDR Adjusted P-Value |
|---------------------------------|-------------------|---------------------------------------------------------------------------------------------|----------------|-----------------------------------------|----------------------|---------------------------------|---------|----------------------|
| <a href="#">ENSG00000183019</a> | MCEMP1            | mast cell expressed membrane protein 1 [Source:HGNC Symbol;Acc:HGNC:27291]                  | protein coding | -0.69                                   | 3.43                 | 20.82                           | <0.0001 | 0.0014               |
| <a href="#">ENSG00000087116</a> | ADAMTS2           | ADAM metalloproteinase with thrombospondin type 1 motif 2 [Source:HGNC Symbol;Acc:HGNC:218] | protein coding | -0.69                                   | 1.60                 | 19.29                           | <0.0001 | 0.0024               |
| <a href="#">ENSG00000120708</a> | TGFBI             | transforming growth factor beta induced [Source:HGNC Symbol;Acc:HGNC:11771]                 | protein coding | -0.68                                   | 5.07                 | 19.92                           | <0.0001 | 0.0019               |
| <a href="#">ENSG00000174705</a> | SH3PXD2B          | SH3 and PX domains 2B [Source:HGNC Symbol;Acc:HGNC:29242]                                   | protein coding | -0.67                                   | 7.09                 | 31.90                           | <0.0001 | <0.0001              |
| <a href="#">ENSG00000005102</a> | MEOX1             | mesenchyme homeobox 1 [Source:HGNC Symbol;Acc:HGNC:7013]                                    | protein coding | 0.67                                    | 1.16                 | 12.33                           | 0.0004  | 0.0258               |
| <a href="#">ENSG00000104918</a> | RETN              | resistin [Source:HGNC Symbol;Acc:HGNC:20389]                                                | protein coding | -0.66                                   | 3.22                 | 11.19                           | 0.0008  | 0.0376               |
| <a href="#">ENSG00000074410</a> | CA12              | carbonic anhydrase 12 [Source:HGNC Symbol;Acc:HGNC:1371]                                    | protein coding | -0.63                                   | 6.63                 | 20.62                           | <0.0001 | 0.0014               |
| <a href="#">ENSG00000164266</a> | SPINK1            | serine peptidase inhibitor, Kazal type 1 [Source:HGNC Symbol;Acc:HGNC:11244]                | protein coding | -0.63                                   | 1.64                 | 10.48                           | 0.0012  | 0.0465               |
| <a href="#">ENSG00000169908</a> | TM4SF1            | transmembrane 4 L six family member 1 [Source:HGNC Symbol;Acc:HGNC:11853]                   | protein coding | -0.63                                   | 4.51                 | 13.30                           | 0.0003  | 0.0188               |
| <a href="#">ENSG00000162494</a> | LRRC38            | leucine rich repeat containing 38 [Source:HGNC Symbol;Acc:HGNC:27005]                       | protein coding | -0.62                                   | 2.07                 | 18.87                           | <0.0001 | 0.0028               |
| <a href="#">ENSG00000187957</a> | DNER              | delta/notch like EGF repeat containing [Source:HGNC Symbol;Acc:HGNC:24456]                  | protein coding | -0.62                                   | 2.87                 | 11.12                           | 0.0009  | 0.038                |
| <a href="#">ENSG00000142405</a> | NLRP12            | NLR family pyrin domain containing 12 [Source:HGNC Symbol;Acc:HGNC:22938]                   | protein coding | -0.62                                   | 2.38                 | 17.70                           | <0.0001 | 0.0043               |
| <a href="#">ENSG00000153208</a> | MERTK             | MER proto-oncogene, tyrosine kinase [Source:HGNC Symbol;Acc:HGNC:7027]                      | protein coding | -0.62                                   | 4.91                 | 15.94                           | <0.0001 | 0.008                |
| <a href="#">ENSG00000259207</a> | ITGB3             | integrin subunit beta 3 [Source:HGNC Symbol;Acc:HGNC:6156]                                  | protein coding | -0.61                                   | 3.85                 | 22.12                           | <0.0001 | 0.001                |
| <a href="#">ENSG00000148344</a> | PTGES             | prostaglandin E synthase [Source:HGNC Symbol;Acc:HGNC:9599]                                 | protein coding | -0.61                                   | 6.53                 | 12.44                           | 0.0004  | 0.0246               |
| <a href="#">ENSG00000122861</a> | PLAU              | plasminogen activator, urokinase [Source:HGNC Symbol;Acc:HGNC:9052]                         | protein coding | -0.61                                   | 5.37                 | 32.57                           | <0.0001 | <0.0001              |
| <a href="#">ENSG00000162493</a> | PDPN              | podoplanin [Source:HGNC Symbol;Acc:HGNC:29602]                                              | protein coding | -0.61                                   | 5.67                 | 20.73                           | <0.0001 | 0.0014               |

**Supplementary Table 11:** Genes differentially expressed at day 28 post-second vaccination compared to day 0 (RNA-Seq). Sorted by descending absolute  $\log_2$  fold change (Day 28 post-second vaccination vs. Day 0). Gene model summaries and annotations are based on Ensembl Version 90 (August 2017) (continued).

| Ensembl Gene ID                 | Ensembl Gene Name | Ensembl Gene Description                                                                         | Gene Type      | $\log_2$ Fold Change (Day 28 vs. Day 0) | Average $\log_2$ CPM | Likelihood Ratio Test Statistic | P-Value | FDR Adjusted P-Value |
|---------------------------------|-------------------|--------------------------------------------------------------------------------------------------|----------------|-----------------------------------------|----------------------|---------------------------------|---------|----------------------|
| <a href="#">ENSG00000100336</a> | APOL4             | apolipoprotein L4 [Source:HGNC Symbol;Acc:HGNC:14867]                                            | protein coding | 0.60                                    | 2.00                 | 12.02                           | 0.0005  | 0.0285               |
| <a href="#">ENSG00000162745</a> | OLFML2B           | olfactomedin like 2B [Source:HGNC Symbol;Acc:HGNC:24558]                                         | protein coding | -0.60                                   | 4.92                 | 18.79                           | <0.0001 | 0.0029               |
| <a href="#">ENSG00000168874</a> | ATOH8             | atonal bHLH transcription factor 8 [Source:HGNC Symbol;Acc:HGNC:24126]                           | protein coding | -0.60                                   | 1.61                 | 10.93                           | 0.0009  | 0.0402               |
| <a href="#">ENSG00000186827</a> | TNFRSF4           | TNF receptor superfamily member 4 [Source:HGNC Symbol;Acc:HGNC:11918]                            | protein coding | 0.60                                    | 5.50                 | 53.48                           | <0.0001 | <0.0001              |
| <a href="#">ENSG00000164400</a> | CSF2              | colony stimulating factor 2 [Source:HGNC Symbol;Acc:HGNC:2434]                                   | protein coding | 0.60                                    | 3.28                 | 11.99                           | 0.0005  | 0.0285               |
| <a href="#">ENSG00000225556</a> | C2CD4D            | C2 calcium dependent domain containing 4D [Source:HGNC Symbol;Acc:HGNC:37210]                    | protein coding | 0.59                                    | 1.25                 | 10.95                           | 0.0009  | 0.0399               |
| <a href="#">ENSG00000225107</a> |                   |                                                                                                  | lincRNA        | -0.59                                   | 2.20                 | 12.72                           | 0.0004  | 0.0226               |
| <a href="#">ENSG00000196549</a> | MME               | membrane metalloendopeptidase [Source:HGNC Symbol;Acc:HGNC:7154]                                 | protein coding | -0.58                                   | 3.10                 | 23.37                           | <0.0001 | 0.0006               |
| <a href="#">ENSG00000135929</a> | CYP27A1           | cytochrome P450 family 27 subfamily A member 1 [Source:HGNC Symbol;Acc:HGNC:2605]                | protein coding | -0.58                                   | 7.17                 | 17.53                           | <0.0001 | 0.0045               |
| <a href="#">ENSG00000196209</a> | SIRPB2            | signal regulatory protein beta 2 [Source:HGNC Symbol;Acc:HGNC:16247]                             | protein coding | -0.58                                   | 3.28                 | 15.55                           | <0.0001 | 0.0089               |
| <a href="#">ENSG00000211659</a> | IGLV3-25          | immunoglobulin lambda variable 3-25 [Source:HGNC Symbol;Acc:HGNC:5908]                           | IG V gene      | 0.58                                    | 2.00                 | 11.75                           | 0.0006  | 0.0306               |
| <a href="#">ENSG00000154856</a> | APCDD1            | APC down-regulated 1 [Source:HGNC Symbol;Acc:HGNC:15718]                                         | protein coding | -0.57                                   | 4.31                 | 27.10                           | <0.0001 | 0.0001               |
| <a href="#">ENSG00000039560</a> | RAI14             | retinoic acid induced 14 [Source:HGNC Symbol;Acc:HGNC:14873]                                     | protein coding | -0.57                                   | 2.82                 | 25.32                           | <0.0001 | 0.0002               |
| <a href="#">ENSG00000166396</a> | SERPINB7          | serpin family B member 7 [Source:HGNC Symbol;Acc:HGNC:13902]                                     | protein coding | -0.57                                   | 7.22                 | 25.91                           | <0.0001 | 0.0002               |
| <a href="#">ENSG00000182578</a> | CSF1R             | colony stimulating factor 1 receptor [Source:HGNC Symbol;Acc:HGNC:2433]                          | protein coding | -0.57                                   | 6.82                 | 12.11                           | 0.0005  | 0.0282               |
| <a href="#">ENSG00000179241</a> | LDLRAD3           | low density lipoprotein receptor class A domain containing 3 [Source:HGNC Symbol;Acc:HGNC:27046] | protein coding | -0.56                                   | 4.87                 | 20.93                           | <0.0001 | 0.0014               |
| <a href="#">ENSG00000093134</a> | VNN3              | vanin 3 [Source:HGNC Symbol;Acc:HGNC:16431]                                                      | protein coding | -0.56                                   | 2.90                 | 15.91                           | <0.0001 | 0.008                |

**Supplementary Table 11:** Genes differentially expressed at day 28 post-second vaccination compared to day 0 (RNA-Seq). Sorted by descending absolute  $\log_2$  fold change (Day 28 post-second vaccination vs. Day 0). Gene model summaries and annotations are based on Ensembl Version 90 (August 2017) (continued).

| Ensembl Gene ID                 | Ensembl Gene Name | Ensembl Gene Description                                                            | Gene Type      | $\log_2$ Fold Change (Day 28 vs. Day 0) | Average $\log_2$ CPM | Likelihood Ratio Test Statistic | P-Value | FDR Adjusted P-Value |
|---------------------------------|-------------------|-------------------------------------------------------------------------------------|----------------|-----------------------------------------|----------------------|---------------------------------|---------|----------------------|
| <a href="#">ENSG00000106853</a> | PTGR1             | prostaglandin reductase 1 [Source:HGNC Symbol;Acc:HGNC:18429]                       | protein coding | -0.56                                   | 3.48                 | 18.19                           | <0.0001 | 0.0037               |
| <a href="#">ENSG00000171631</a> | P2RY6             | pyrimidinergic receptor P2Y6 [Source:HGNC Symbol;Acc:HGNC:8543]                     | protein coding | -0.56                                   | 4.59                 | 21.66                           | <0.0001 | 0.0011               |
| <a href="#">ENSG00000163221</a> | S100A12           | S100 calcium binding protein A12 [Source:HGNC Symbol;Acc:HGNC:10489]                | protein coding | -0.56                                   | 5.85                 | 12.80                           | 0.0003  | 0.0219               |
| <a href="#">ENSG00000167850</a> | CD300C            | CD300c molecule [Source:HGNC Symbol;Acc:HGNC:19320]                                 | protein coding | -0.55                                   | 3.88                 | 29.88                           | <0.0001 | <0.0001              |
| <a href="#">ENSG00000113749</a> | HRH2              | histamine receptor H2 [Source:HGNC Symbol;Acc:HGNC:5183]                            | protein coding | -0.55                                   | 4.02                 | 13.67                           | 0.0002  | 0.0161               |
| <a href="#">ENSG00000185052</a> | SLC24A3           | solute carrier family 24 member 3 [Source:HGNC Symbol;Acc:HGNC:10977]               | protein coding | -0.54                                   | 3.49                 | 20.98                           | <0.0001 | 0.0014               |
| <a href="#">ENSG00000170458</a> | CD14              | CD14 molecule [Source:HGNC Symbol;Acc:HGNC:1628]                                    | protein coding | -0.54                                   | 9.80                 | 12.83                           | 0.0003  | 0.0219               |
| <a href="#">ENSG00000035862</a> | TIMP2             | TIMP metalloproteinase inhibitor 2 [Source:HGNC Symbol;Acc:HGNC:11821]              | protein coding | -0.54                                   | 4.58                 | 28.04                           | <0.0001 | 0.0001               |
| <a href="#">ENSG00000018280</a> | SLC11A1           | solute carrier family 11 member 1 [Source:HGNC Symbol;Acc:HGNC:10907]               | protein coding | -0.54                                   | 8.70                 | 19.43                           | <0.0001 | 0.0023               |
| <a href="#">ENSG00000139354</a> | GAS2L3            | growth arrest specific 2 like 3 [Source:HGNC Symbol;Acc:HGNC:27475]                 | protein coding | -0.53                                   | 2.52                 | 15.87                           | <0.0001 | 0.008                |
| <a href="#">ENSG00000125730</a> | C3                | complement C3 [Source:HGNC Symbol;Acc:HGNC:1318]                                    | protein coding | -0.53                                   | 6.88                 | 21.55                           | <0.0001 | 0.0011               |
| <a href="#">ENSG00000100985</a> | MMP9              | matrix metalloproteinase 9 [Source:HGNC Symbol;Acc:HGNC:7176]                       | protein coding | -0.53                                   | 8.49                 | 15.40                           | <0.0001 | 0.0092               |
| <a href="#">ENSG00000128578</a> | STRIP2            | striatin interacting protein 2 [Source:HGNC Symbol;Acc:HGNC:22209]                  | protein coding | -0.52                                   | 3.53                 | 31.01                           | <0.0001 | <0.0001              |
| <a href="#">ENSG00000143546</a> | S100A8            | S100 calcium binding protein A8 [Source:HGNC Symbol;Acc:HGNC:10498]                 | protein coding | -0.51                                   | 7.75                 | 13.08                           | 0.0003  | 0.0197               |
| <a href="#">ENSG00000134028</a> | ADAMDEC1          | ADAM like decysin 1 [Source:HGNC Symbol;Acc:HGNC:16299]                             | protein coding | -0.51                                   | 7.43                 | 13.67                           | 0.0002  | 0.0161               |
| <a href="#">ENSG00000153071</a> | DAB2              | DAB2, clathrin adaptor protein [Source:HGNC Symbol;Acc:HGNC:2662]                   | protein coding | -0.51                                   | 5.42                 | 27.61                           | <0.0001 | 0.0001               |
| <a href="#">ENSG00000198682</a> | PAPSS2            | 3'-phosphoadenosine 5'-phosphosulfate synthase 2 [Source:HGNC Symbol;Acc:HGNC:8604] | protein coding | -0.51                                   | 6.07                 | 20.28                           | <0.0001 | 0.0016               |



**Supplementary Table 11:** Genes differentially expressed at day 28 post-second vaccination compared to day 0 (RNA-Seq). Sorted by descending absolute  $\log_2$  fold change (Day 28 post-second vaccination vs. Day 0). Gene model summaries and annotations are based on Ensembl Version 90 (August 2017) (continued).

| Ensembl Gene ID                 | Ensembl Gene Name | Ensembl Gene Description                                                                | Gene Type            | $\log_2$ Fold Change (Day 28 vs. Day 0) | Average $\log_2$ CPM | Likelihood Ratio Test Statistic | P-Value | FDR Adjusted P-Value |
|---------------------------------|-------------------|-----------------------------------------------------------------------------------------|----------------------|-----------------------------------------|----------------------|---------------------------------|---------|----------------------|
| <a href="#">ENSG00000107249</a> | GLIS3             | GLIS family zinc finger 3 [Source:HGNC Symbol;Acc:HGNC:28510]                           | protein coding       | -0.50                                   | 5.48                 | 25.96                           | <0.0001 | 0.0002               |
| <a href="#">ENSG00000163220</a> | S100A9            | S100 calcium binding protein A9 [Source:HGNC Symbol;Acc:HGNC:10499]                     | protein coding       | -0.50                                   | 11.16                | 10.87                           | 0.001   | 0.0408               |
| <a href="#">ENSG00000099250</a> | NRP1              | neuropilin 1 [Source:HGNC Symbol;Acc:HGNC:8004]                                         | protein coding       | -0.50                                   | 6.56                 | 27.05                           | <0.0001 | 0.0001               |
| <a href="#">ENSG00000124216</a> | SNAI1             | snail family transcriptional repressor 1 [Source:HGNC Symbol;Acc:HGNC:11128]            | protein coding       | -0.49                                   | 3.02                 | 13.84                           | 0.0002  | 0.0151               |
| <a href="#">ENSG00000145555</a> | MYO10             | myosin X [Source:HGNC Symbol;Acc:HGNC:7593]                                             | protein coding       | -0.49                                   | 3.71                 | 20.82                           | <0.0001 | 0.0014               |
| <a href="#">ENSG00000091106</a> | NLRC4             | NLR family CARD domain containing 4 [Source:HGNC Symbol;Acc:HGNC:16412]                 | protein coding       | -0.49                                   | 4.77                 | 11.44                           | 0.0007  | 0.0345               |
| <a href="#">ENSG00000112394</a> | SLC16A10          | solute carrier family 16 member 10 [Source:HGNC Symbol;Acc:HGNC:17027]                  | protein coding       | -0.48                                   | 6.88                 | 15.57                           | <0.0001 | 0.0089               |
| <a href="#">ENSG00000284486</a> |                   |                                                                                         | processed transcript | -0.48                                   | 1.51                 | 12.51                           | 0.0004  | 0.0241               |
| <a href="#">ENSG00000134830</a> | C5AR2             | complement component 5a receptor 2 [Source:HGNC Symbol;Acc:HGNC:4527]                   | protein coding       | -0.47                                   | 2.52                 | 10.37                           | 0.0013  | 0.0482               |
| <a href="#">ENSG00000112715</a> | VEGFA             | vascular endothelial growth factor A [Source:HGNC Symbol;Acc:HGNC:12680]                | protein coding       | -0.47                                   | 6.48                 | 24.60                           | <0.0001 | 0.0003               |
| <a href="#">ENSG00000127838</a> | PNKD              | paroxysmal nonkinesigenic dyskinesia [Source:HGNC Symbol;Acc:HGNC:9153]                 | protein coding       | -0.47                                   | 6.59                 | 32.63                           | <0.0001 | <0.0001              |
| <a href="#">ENSG00000265100</a> |                   |                                                                                         | antisense RNA        | 0.47                                    | 1.38                 | 11.60                           | 0.0007  | 0.0326               |
| <a href="#">ENSG00000073792</a> | IGF2BP2           | insulin like growth factor 2 mRNA binding protein 2 [Source:HGNC Symbol;Acc:HGNC:28867] | protein coding       | -0.47                                   | 2.38                 | 11.55                           | 0.0007  | 0.033                |
| <a href="#">ENSG00000114251</a> | WNT5A             | Wnt family member 5A [Source:HGNC Symbol;Acc:HGNC:12784]                                | protein coding       | -0.47                                   | 5.59                 | 12.00                           | 0.0005  | 0.0285               |
| <a href="#">ENSG00000146072</a> | TNFRSF21          | TNF receptor superfamily member 21 [Source:HGNC Symbol;Acc:HGNC:13469]                  | protein coding       | -0.47                                   | 5.67                 | 11.33                           | 0.0008  | 0.0357               |
| <a href="#">ENSG00000150760</a> | DOCK1             | dedicator of cytokinesis 1 [Source:HGNC Symbol;Acc:HGNC:2987]                           | protein coding       | -0.47                                   | 2.42                 | 13.65                           | 0.0002  | 0.0161               |
| <a href="#">ENSG00000100292</a> | HMOX1             | heme oxygenase 1 [Source:HGNC Symbol;Acc:HGNC:5013]                                     | protein coding       | -0.46                                   | 7.25                 | 21.53                           | <0.0001 | 0.0011               |
| <a href="#">ENSG00000135373</a> | EHF               | ETS homologous factor [Source:HGNC Symbol;Acc:HGNC:3246]                                | protein coding       | -0.46                                   | 3.34                 | 12.10                           | 0.0005  | 0.0282               |

**Supplementary Table 11:** Genes differentially expressed at day 28 post-second vaccination compared to day 0 (RNA-Seq). Sorted by descending absolute  $\log_2$  fold change (Day 28 post-second vaccination vs. Day 0). Gene model summaries and annotations are based on Ensembl Version 90 (August 2017) (continued).

| Ensembl Gene ID                 | Ensembl Gene Name | Ensembl Gene Description                                                                              | Gene Type            | $\log_2$ Fold Change (Day 28 vs. Day 0) | Average $\log_2$ CPM | Likelihood Ratio Test Statistic | P-Value | FDR Adjusted P-Value |
|---------------------------------|-------------------|-------------------------------------------------------------------------------------------------------|----------------------|-----------------------------------------|----------------------|---------------------------------|---------|----------------------|
| <a href="#">ENSG00000142185</a> | TRPM2             | transient receptor potential cation channel sub-family M member 2 [Source:HGNC Symbol;Acc:HGNC:12339] | protein coding       | -0.46                                   | 6.03                 | 30.63                           | <0.0001 | <0.0001              |
| <a href="#">ENSG00000003436</a> | TFPI              | tissue factor pathway inhibitor [Source:HGNC Symbol;Acc:HGNC:11760]                                   | protein coding       | -0.46                                   | 4.63                 | 20.68                           | <0.0001 | 0.0014               |
| <a href="#">ENSG00000124731</a> | TREM1             | triggering receptor expressed on myeloid cells 1 [Source:HGNC Symbol;Acc:HGNC:17760]                  | protein coding       | -0.45                                   | 8.05                 | 21.99                           | <0.0001 | 0.001                |
| <a href="#">ENSG00000280254</a> |                   |                                                                                                       | TEC                  | -0.45                                   | 2.34                 | 14.56                           | 0.0001  | 0.0121               |
| <a href="#">ENSG00000143545</a> | RAB13             | RAB13, member RAS oncogene family [Source:HGNC Symbol;Acc:HGNC:9762]                                  | protein coding       | -0.45                                   | 5.22                 | 14.73                           | 0.0001  | 0.0114               |
| <a href="#">ENSG00000002587</a> | HS3ST1            | heparan sulfate-glucosamine 3-sulfotransferase 1 [Source:HGNC Symbol;Acc:HGNC:5194]                   | protein coding       | -0.45                                   | 5.10                 | 15.96                           | <0.0001 | 0.008                |
| <a href="#">ENSG00000213694</a> | S1PR3             | sphingosine-1-phosphate receptor 3 [Source:HGNC Symbol;Acc:HGNC:3167]                                 | protein coding       | -0.45                                   | 2.16                 | 14.96                           | 0.0001  | 0.0106               |
| <a href="#">ENSG00000268734</a> |                   |                                                                                                       | lincRNA              | -0.45                                   | 4.76                 | 16.41                           | <0.0001 | 0.0069               |
| <a href="#">ENSG00000125810</a> | CD93              | CD93 molecule [Source:HGNC Symbol;Acc:HGNC:15855]                                                     | protein coding       | -0.44                                   | 9.75                 | 13.40                           | 0.0003  | 0.018                |
| <a href="#">ENSG00000008394</a> | MGST1             | microsomal glutathione S-transferase 1 [Source:HGNC Symbol;Acc:HGNC:7061]                             | protein coding       | -0.44                                   | 3.83                 | 15.74                           | <0.0001 | 0.0085               |
| <a href="#">ENSG00000225774</a> | SIRPAP1           | signal regulatory protein alpha pseudogene 1 [Source:HGNC Symbol;Acc:HGNC:9663]                       | processed pseudogene | -0.44                                   | 1.58                 | 10.60                           | 0.0011  | 0.0446               |
| <a href="#">ENSG00000105520</a> | PLPPR2            | phospholipid phosphatase related 2 [Source:HGNC Symbol;Acc:HGNC:29566]                                | protein coding       | -0.44                                   | 3.29                 | 12.68                           | 0.0004  | 0.0226               |
| <a href="#">ENSG00000142512</a> | SIGLEC10          | sialic acid binding Ig like lectin 10 [Source:HGNC Symbol;Acc:HGNC:15620]                             | protein coding       | -0.44                                   | 4.14                 | 11.76                           | 0.0006  | 0.0306               |
| <a href="#">ENSG00000197405</a> | C5AR1             | complement C5a receptor 1 [Source:HGNC Symbol;Acc:HGNC:1338]                                          | protein coding       | -0.43                                   | 8.36                 | 15.70                           | <0.0001 | 0.0085               |
| <a href="#">ENSG00000168461</a> | RAB31             | RAB31, member RAS oncogene family [Source:HGNC Symbol;Acc:HGNC:9771]                                  | protein coding       | -0.43                                   | 7.79                 | 20.69                           | <0.0001 | 0.0014               |
| <a href="#">ENSG00000100504</a> | PYGL              | glycogen phosphorylase L [Source:HGNC Symbol;Acc:HGNC:9725]                                           | protein coding       | -0.43                                   | 5.46                 | 12.24                           | 0.0005  | 0.0268               |
| <a href="#">ENSG00000124882</a> | EREG              | epiregulin [Source:HGNC Symbol;Acc:HGNC:3443]                                                         | protein coding       | -0.43                                   | 7.77                 | 10.70                           | 0.0011  | 0.0431               |

**Supplementary Table 11:** Genes differentially expressed at day 28 post-second vaccination compared to day 0 (RNA-Seq). Sorted by descending absolute  $\log_2$  fold change (Day 28 post-second vaccination vs. Day 0). Gene model summaries and annotations are based on Ensembl Version 90 (August 2017) (continued).

| Ensembl Gene ID                 | Ensembl Gene Name | Ensembl Gene Description                                                         | Gene Type      | $\log_2$ Fold Change (Day 28 vs. Day 0) | Average $\log_2$ CPM | Likelihood Ratio Test Statistic | P-Value | FDR Adjusted P-Value |
|---------------------------------|-------------------|----------------------------------------------------------------------------------|----------------|-----------------------------------------|----------------------|---------------------------------|---------|----------------------|
| <a href="#">ENSG00000169122</a> | FAM110B           | family with sequence similarity 110 member B [Source:HGNC Symbol;Acc:HGNC:28587] | protein coding | -0.43                                   | 1.87                 | 10.48                           | 0.0012  | 0.0465               |
| <a href="#">ENSG00000189060</a> | H1F0              | H1 histone family member 0 [Source:HGNC Symbol;Acc:HGNC:4714]                    | protein coding | -0.43                                   | 5.19                 | 11.87                           | 0.0006  | 0.0296               |
| <a href="#">ENSG00000186407</a> | CD300E            | CD300e molecule [Source:HGNC Symbol;Acc:HGNC:28874]                              | protein coding | -0.43                                   | 9.43                 | 11.38                           | 0.0007  | 0.0351               |
| <a href="#">ENSG00000224397</a> | SMIM25            | small integral membrane protein 25 [Source:HGNC Symbol;Acc:HGNC:50328]           | lincRNA        | -0.43                                   | 4.48                 | 17.05                           | <0.0001 | 0.0055               |
| <a href="#">ENSG00000138061</a> | CYP1B1            | cytochrome P450 family 1 subfamily B member 1 [Source:HGNC Symbol;Acc:HGNC:2597] | protein coding | -0.43                                   | 8.64                 | 12.68                           | 0.0004  | 0.0226               |
| <a href="#">ENSG00000143226</a> | FCGR2A            | Fc fragment of IgG receptor IIa [Source:HGNC Symbol;Acc:HGNC:3616]               | protein coding | -0.42                                   | 7.11                 | 21.86                           | <0.0001 | 0.001                |
| <a href="#">ENSG00000175352</a> | NRIP3             | nuclear receptor interacting protein 3 [Source:HGNC Symbol;Acc:HGNC:1167]        | protein coding | -0.42                                   | 5.63                 | 23.01                           | <0.0001 | 0.0007               |
| <a href="#">ENSG00000169860</a> | P2RY1             | purinergic receptor P2Y1 [Source:HGNC Symbol;Acc:HGNC:8539]                      | protein coding | -0.42                                   | 2.62                 | 12.55                           | 0.0004  | 0.0237               |
| <a href="#">ENSG00000136634</a> | IL10              | interleukin 10 [Source:HGNC Symbol;Acc:HGNC:5962]                                | protein coding | -0.42                                   | 6.18                 | 19.17                           | <0.0001 | 0.0025               |
| <a href="#">ENSG00000144959</a> | NCEH1             | neutral cholesterol ester hydrolase 1 [Source:HGNC Symbol;Acc:HGNC:29260]        | protein coding | -0.42                                   | 4.76                 | 15.04                           | 0.0001  | 0.0105               |
| <a href="#">ENSG00000167680</a> | SEMA6B            | semaphorin 6B [Source:HGNC Symbol;Acc:HGNC:10739]                                | protein coding | -0.42                                   | 7.96                 | 12.97                           | 0.0003  | 0.0206               |
| <a href="#">ENSG00000088826</a> | SMOX              | spermine oxidase [Source:HGNC Symbol;Acc:HGNC:15862]                             | protein coding | -0.42                                   | 5.28                 | 19.06                           | <0.0001 | 0.0026               |
| <a href="#">ENSG00000254415</a> | SIGLEC14          | sialic acid binding Ig like lectin 14 [Source:HGNC Symbol;Acc:HGNC:32926]        | protein coding | -0.41                                   | 6.50                 | 13.08                           | 0.0003  | 0.0197               |
| <a href="#">ENSG00000088543</a> | C3orf18           | chromosome 3 open reading frame 18 [Source:HGNC Symbol;Acc:HGNC:24837]           | protein coding | 0.41                                    | 2.82                 | 17.94                           | <0.0001 | 0.0039               |
| <a href="#">ENSG00000115107</a> | STEAP3            | STEAP3 metalloredutase [Source:HGNC Symbol;Acc:HGNC:24592]                       | protein coding | -0.41                                   | 4.94                 | 16.63                           | <0.0001 | 0.0063               |
| <a href="#">ENSG00000169439</a> | SDC2              | syndecan 2 [Source:HGNC Symbol;Acc:HGNC:10659]                                   | protein coding | -0.41                                   | 8.44                 | 12.67                           | 0.0004  | 0.0226               |
| <a href="#">ENSG00000180113</a> | TDRD6             | tudor domain containing 6 [Source:HGNC Symbol;Acc:HGNC:21339]                    | protein coding | -0.41                                   | 5.30                 | 18.77                           | <0.0001 | 0.0029               |

**Supplementary Table 11:** Genes differentially expressed at day 28 post-second vaccination compared to day 0 (RNA-Seq). Sorted by descending absolute  $\log_2$  fold change (Day 28 post-second vaccination vs. Day 0). Gene model summaries and annotations are based on Ensembl Version 90 (August 2017) (continued).

| Ensembl Gene ID                 | Ensembl Gene Name | Ensembl Gene Description                                                                                     | Gene Type      | $\log_2$ Fold Change (Day 28 vs. Day 0) | Average $\log_2$ CPM | Likelihood Ratio Test Statistic | P-Value | FDR Adjusted P-Value |
|---------------------------------|-------------------|--------------------------------------------------------------------------------------------------------------|----------------|-----------------------------------------|----------------------|---------------------------------|---------|----------------------|
| <a href="#">ENSG00000167703</a> | SLC43A2           | solute carrier family 43 member 2 [Source:HGNC Symbol;Acc:HGNC:23087]                                        | protein coding | -0.41                                   | 9.75                 | 14.14                           | 0.0002  | 0.0135               |
| <a href="#">ENSG00000051128</a> | HOMER3            | homer scaffolding protein 3 [Source:HGNC Symbol;Acc:HGNC:17514]                                              | protein coding | -0.40                                   | 3.09                 | 10.52                           | 0.0012  | 0.0461               |
| <a href="#">ENSG00000100767</a> | PAPLN             | papilin, proteoglycan like sulfated glycoprotein [Source:HGNC Symbol;Acc:HGNC:19262]                         | protein coding | -0.40                                   | 4.60                 | 15.66                           | <0.0001 | 0.0086               |
| <a href="#">ENSG00000105976</a> | MET               | MET proto-oncogene, receptor tyrosine kinase [Source:HGNC Symbol;Acc:HGNC:7029]                              | protein coding | -0.40                                   | 8.36                 | 15.49                           | <0.0001 | 0.009                |
| <a href="#">ENSG00000115594</a> | IL1R1             | interleukin 1 receptor type 1 [Source:HGNC Symbol;Acc:HGNC:5993]                                             | protein coding | -0.40                                   | 6.35                 | 14.23                           | 0.0002  | 0.0132               |
| <a href="#">ENSG00000145936</a> | KCNMB1            | potassium calcium-activated channel subfamily M regulatory beta subunit 1 [Source:HGNC Symbol;Acc:HGNC:6285] | protein coding | -0.40                                   | 2.20                 | 13.71                           | 0.0002  | 0.0161               |
| <a href="#">ENSG00000165801</a> | ARHGEF40          | Rho guanine nucleotide exchange factor 40 [Source:HGNC Symbol;Acc:HGNC:25516]                                | protein coding | -0.40                                   | 4.19                 | 10.66                           | 0.0011  | 0.0437               |
| <a href="#">ENSG00000166825</a> | ANPEP             | alanyl aminopeptidase, membrane [Source:HGNC Symbol;Acc:HGNC:500]                                            | protein coding | -0.40                                   | 8.86                 | 15.15                           | <0.0001 | 0.0101               |
| <a href="#">ENSG00000197249</a> | SERPINA1          | serpin family A member 1 [Source:HGNC Symbol;Acc:HGNC:8941]                                                  | protein coding | -0.40                                   | 9.39                 | 14.41                           | 0.0001  | 0.0129               |
| <a href="#">ENSG00000138448</a> | ITGAV             | integrin subunit alpha V [Source:HGNC Symbol;Acc:HGNC:6150]                                                  | protein coding | -0.40                                   | 8.09                 | 10.82                           | 0.001   | 0.0416               |
| <a href="#">ENSG00000168615</a> | ADAM9             | ADAM metallopeptidase domain 9 [Source:HGNC Symbol;Acc:HGNC:216]                                             | protein coding | -0.40                                   | 7.63                 | 13.21                           | 0.0003  | 0.0192               |
| <a href="#">ENSG00000151012</a> | SLC7A11           | solute carrier family 7 member 11 [Source:HGNC Symbol;Acc:HGNC:11059]                                        | protein coding | -0.39                                   | 9.51                 | 11.93                           | 0.0006  | 0.029                |
| <a href="#">ENSG00000011422</a> | PLAUR             | plasminogen activator, urokinase receptor [Source:HGNC Symbol;Acc:HGNC:9053]                                 | protein coding | -0.39                                   | 10.18                | 11.10                           | 0.0009  | 0.0382               |
| <a href="#">ENSG00000102471</a> | NDFIP2            | Nedd4 family interacting protein 2 [Source:HGNC Symbol;Acc:HGNC:18537]                                       | protein coding | 0.39                                    | 3.53                 | 10.69                           | 0.0011  | 0.0431               |
| <a href="#">ENSG00000158869</a> | FCER1G            | Fc fragment of IgE receptor Ig [Source:HGNC Symbol;Acc:HGNC:3611]                                            | protein coding | -0.39                                   | 9.37                 | 11.80                           | 0.0006  | 0.0302               |
| <a href="#">ENSG00000050730</a> | TNIP3             | TNFAIP3 interacting protein 3 [Source:HGNC Symbol;Acc:HGNC:19315]                                            | protein coding | -0.39                                   | 8.44                 | 15.40                           | <0.0001 | 0.0092               |
| <a href="#">ENSG00000225963</a> |                   |                                                                                                              | antisense RNA  | 0.39                                    | 2.16                 | 10.48                           | 0.0012  | 0.0465               |

**Supplementary Table 11:** Genes differentially expressed at day 28 post-second vaccination compared to day 0 (RNA-Seq). Sorted by descending absolute  $\log_2$  fold change (Day 28 post-second vaccination vs. Day 0). Gene model summaries and annotations are based on Ensembl Version 90 (August 2017) (continued).

| Ensembl Gene ID                 | Ensembl Gene Name | Ensembl Gene Description                                                         | Gene Type      | $\log_2$ Fold Change (Day 28 vs. Day 0) | Average $\log_2$ CPM | Likelihood Ratio Test Statistic | P-Value | FDR Adjusted P-Value |
|---------------------------------|-------------------|----------------------------------------------------------------------------------|----------------|-----------------------------------------|----------------------|---------------------------------|---------|----------------------|
| <a href="#">ENSG00000165474</a> | GJB2              | gap junction protein beta 2 [Source:HGNC Symbol;Acc:HGNC:4284]                   | protein coding | -0.39                                   | 7.76                 | 13.16                           | 0.0003  | 0.0193               |
| <a href="#">ENSG00000250274</a> |                   |                                                                                  | lincRNA        | -0.39                                   | 2.75                 | 10.86                           | 0.001   | 0.0408               |
| <a href="#">ENSG00000181019</a> | NQO1              | NAD(P)H quinone dehydrogenase 1 [Source:HGNC Symbol;Acc:HGNC:2874]               | protein coding | -0.39                                   | 4.36                 | 16.12                           | <0.0001 | 0.0077               |
| <a href="#">ENSG00000150510</a> | FAM124A           | family with sequence similarity 124 member A [Source:HGNC Symbol;Acc:HGNC:26413] | protein coding | -0.39                                   | 4.45                 | 18.23                           | <0.0001 | 0.0037               |
| <a href="#">ENSG00000140848</a> | CPNE2             | copine 2 [Source:HGNC Symbol;Acc:HGNC:2315]                                      | protein coding | -0.39                                   | 4.87                 | 23.18                           | <0.0001 | 0.0006               |
| <a href="#">ENSG00000169902</a> | TPST1             | tyrosylprotein sulfotransferase 1 [Source:HGNC Symbol;Acc:HGNC:12020]            | protein coding | -0.39                                   | 3.29                 | 10.72                           | 0.0011  | 0.0429               |
| <a href="#">ENSG00000103569</a> | AQP9              | aquaporin 9 [Source:HGNC Symbol;Acc:HGNC:643]                                    | protein coding | -0.38                                   | 9.66                 | 11.88                           | 0.0006  | 0.0296               |
| <a href="#">ENSG00000129450</a> | SIGLEC9           | sialic acid binding Ig like lectin 9 [Source:HGNC Symbol;Acc:HGNC:10878]         | protein coding | -0.38                                   | 6.25                 | 25.45                           | <0.0001 | 0.0002               |
| <a href="#">ENSG00000166927</a> | MS4A7             | membrane spanning 4-domains A7 [Source:HGNC Symbol;Acc:HGNC:13378]               | protein coding | -0.38                                   | 7.10                 | 11.02                           | 0.0009  | 0.0392               |
| <a href="#">ENSG00000175489</a> | LRRC25            | leucine rich repeat containing 25 [Source:HGNC Symbol;Acc:HGNC:29806]            | protein coding | -0.38                                   | 8.52                 | 14.73                           | 0.0001  | 0.0114               |
| <a href="#">ENSG00000145014</a> | TMEM44            | transmembrane protein 44 [Source:HGNC Symbol;Acc:HGNC:25120]                     | protein coding | -0.38                                   | 2.86                 | 15.50                           | <0.0001 | 0.009                |
| <a href="#">ENSG00000020181</a> | ADGRA2            | adhesion G protein-coupled receptor A2 [Source:HGNC Symbol;Acc:HGNC:17849]       | protein coding | -0.38                                   | 5.08                 | 12.65                           | 0.0004  | 0.0227               |
| <a href="#">ENSG00000155465</a> | SLC7A7            | solute carrier family 7 member 7 [Source:HGNC Symbol;Acc:HGNC:11065]             | protein coding | -0.38                                   | 8.55                 | 16.27                           | <0.0001 | 0.0073               |
| <a href="#">ENSG00000163191</a> | S100A11           | S100 calcium binding protein A11 [Source:HGNC Symbol;Acc:HGNC:10488]             | protein coding | -0.38                                   | 6.82                 | 16.72                           | <0.0001 | 0.0062               |
| <a href="#">ENSG00000153162</a> | BMP6              | bone morphogenetic protein 6 [Source:HGNC Symbol;Acc:HGNC:1073]                  | protein coding | -0.38                                   | 3.64                 | 13.08                           | 0.0003  | 0.0197               |
| <a href="#">ENSG00000239653</a> | PSMD6-AS2         | PSMD6 antisense RNA 2 [Source:HGNC Symbol;Acc:HGNC:44125]                        | antisense RNA  | 0.38                                    | 2.72                 | 12.01                           | 0.0005  | 0.0285               |
| <a href="#">ENSG00000139572</a> | GPR84             | G protein-coupled receptor 84 [Source:HGNC Symbol;Acc:HGNC:4535]                 | protein coding | -0.37                                   | 6.91                 | 13.01                           | 0.0003  | 0.0202               |
| <a href="#">ENSG00000196923</a> | PDLIM7            | PDZ and LIM domain 7 [Source:HGNC Symbol;Acc:HGNC:22958]                         | protein coding | -0.37                                   | 4.85                 | 17.62                           | <0.0001 | 0.0044               |

**Supplementary Table 11:** Genes differentially expressed at day 28 post-second vaccination compared to day 0 (RNA-Seq). Sorted by descending absolute  $\log_2$  fold change (Day 28 post-second vaccination vs. Day 0). Gene model summaries and annotations are based on Ensembl Version 90 (August 2017) (continued).

| Ensembl Gene ID                 | Ensembl Gene Name | Ensembl Gene Description                                                                | Gene Type                      | $\log_2$ Fold Change (Day 28 vs. Day 0) | Average $\log_2$ CPM | Likelihood Ratio Test Statistic | P-Value | FDR Adjusted P-Value |
|---------------------------------|-------------------|-----------------------------------------------------------------------------------------|--------------------------------|-----------------------------------------|----------------------|---------------------------------|---------|----------------------|
| <a href="#">ENSG00000185697</a> | MYBL1             | MYB proto-oncogene like 1 [Source:HGNC Symbol;Acc:HGNC:7547]                            | protein coding                 | 0.37                                    | 5.53                 | 27.77                           | <0.0001 | 0.0001               |
| <a href="#">ENSG00000260549</a> | MT1L              | metallothionein 1L, pseudogene [Source:HGNC Symbol;Acc:HGNC:7404]                       | transcribed unitary pseudogene | -0.37                                   | 6.58                 | 10.28                           | 0.0013  | 0.0496               |
| <a href="#">ENSG00000242048</a> |                   |                                                                                         | processed transcript           | -0.37                                   | 3.82                 | 11.43                           | 0.0007  | 0.0346               |
| <a href="#">ENSG00000173918</a> | C1QTNF1           | C1q and TNF related 1 [Source:HGNC Symbol;Acc:HGNC:14324]                               | protein coding                 | -0.37                                   | 7.84                 | 17.31                           | <0.0001 | 0.0049               |
| <a href="#">ENSG00000215424</a> | MCM3AP-AS1        | MCM3AP antisense RNA 1 [Source:HGNC Symbol;Acc:HGNC:16417]                              | antisense RNA                  | 0.37                                    | 2.17                 | 10.48                           | 0.0012  | 0.0465               |
| <a href="#">ENSG00000229644</a> | NAMPTP1           | nicotinamide phosphoribosyltransferase pseudogene 1 [Source:HGNC Symbol;Acc:HGNC:17633] | processed pseudogene           | -0.37                                   | 8.45                 | 12.32                           | 0.0004  | 0.0259               |
| <a href="#">ENSG00000123342</a> | MMP19             | matrix metalloproteinase 19 [Source:HGNC Symbol;Acc:HGNC:7165]                          | protein coding                 | -0.37                                   | 7.45                 | 16.71                           | <0.0001 | 0.0062               |
| <a href="#">ENSG00000136689</a> | IL1RN             | interleukin 1 receptor antagonist [Source:HGNC Symbol;Acc:HGNC:6000]                    | protein coding                 | -0.37                                   | 8.75                 | 13.64                           | 0.0002  | 0.0162               |
| <a href="#">ENSG00000075651</a> | PLD1              | phospholipase D1 [Source:HGNC Symbol;Acc:HGNC:9067]                                     | protein coding                 | -0.37                                   | 6.71                 | 20.41                           | <0.0001 | 0.0015               |
| <a href="#">ENSG00000085514</a> | PILRA             | paired immunoglobulin like type 2 receptor alpha [Source:HGNC Symbol;Acc:HGNC:20396]    | protein coding                 | -0.37                                   | 8.11                 | 13.20                           | 0.0003  | 0.0192               |
| <a href="#">ENSG00000101336</a> | HCK               | HCK proto-oncogene, Src family tyrosine kinase [Source:HGNC Symbol;Acc:HGNC:4840]       | protein coding                 | -0.36                                   | 9.62                 | 12.05                           | 0.0005  | 0.0283               |
| <a href="#">ENSG00000111424</a> | VDR               | vitamin D receptor [Source:HGNC Symbol;Acc:HGNC:12679]                                  | protein coding                 | -0.36                                   | 5.93                 | 22.08                           | <0.0001 | 0.001                |
| <a href="#">ENSG00000099985</a> | OSM               | oncostatin M [Source:HGNC Symbol;Acc:HGNC:8506]                                         | protein coding                 | -0.36                                   | 7.82                 | 14.16                           | 0.0002  | 0.0135               |
| <a href="#">ENSG00000113070</a> | HBEGF             | heparin binding EGF like growth factor [Source:HGNC Symbol;Acc:HGNC:3059]               | protein coding                 | -0.36                                   | 6.70                 | 12.70                           | 0.0004  | 0.0226               |
| <a href="#">ENSG00000198853</a> | RUSC2             | RUN and SH3 domain containing 2 [Source:HGNC Symbol;Acc:HGNC:23625]                     | protein coding                 | -0.36                                   | 5.95                 | 14.26                           | 0.0002  | 0.0132               |
| <a href="#">ENSG00000167613</a> | LAIR1             | leukocyte associated immunoglobulin like receptor 1 [Source:HGNC Symbol;Acc:HGNC:6477]  | protein coding                 | -0.36                                   | 8.22                 | 15.30                           | <0.0001 | 0.0096               |

**Supplementary Table 11:** Genes differentially expressed at day 28 post-second vaccination compared to day 0 (RNA-Seq). Sorted by descending absolute  $\log_2$  fold change (Day 28 post-second vaccination vs. Day 0). Gene model summaries and annotations are based on Ensembl Version 90 (August 2017) (continued).

| Ensembl Gene ID                 | Ensembl Gene Name | Ensembl Gene Description                                                                | Gene Type      | $\log_2$ Fold Change (Day 28 vs. Day 0) | Average $\log_2$ CPM | Likelihood Ratio Test Statistic | P-Value | FDR Adjusted P-Value |
|---------------------------------|-------------------|-----------------------------------------------------------------------------------------|----------------|-----------------------------------------|----------------------|---------------------------------|---------|----------------------|
| <a href="#">ENSG00000145649</a> | GZMA              | granzyme A [Source:HGNC Symbol;Acc:HGNC:4708]                                           | protein coding | 0.36                                    | 5.50                 | 17.81                           | <0.0001 | 0.0042               |
| <a href="#">ENSG00000173083</a> | HPSE              | heparanase [Source:HGNC Symbol;Acc:HGNC:5164]                                           | protein coding | -0.36                                   | 6.52                 | 15.89                           | <0.0001 | 0.008                |
| <a href="#">ENSG00000121743</a> | GJA3              | gap junction protein alpha 3 [Source:HGNC Symbol;Acc:HGNC:4277]                         | protein coding | -0.36                                   | 5.50                 | 15.31                           | <0.0001 | 0.0096               |
| <a href="#">ENSG00000116701</a> | NCF2              | neutrophil cytosolic factor 2 [Source:HGNC Symbol;Acc:HGNC:7661]                        | protein coding | -0.35                                   | 8.08                 | 16.17                           | <0.0001 | 0.0076               |
| <a href="#">ENSG00000075223</a> | SEMA3C            | semaphorin 3C [Source:HGNC Symbol;Acc:HGNC:10725]                                       | protein coding | -0.35                                   | 6.58                 | 11.40                           | 0.0007  | 0.035                |
| <a href="#">ENSG00000134531</a> | EMP1              | epithelial membrane protein 1 [Source:HGNC Symbol;Acc:HGNC:3333]                        | protein coding | -0.35                                   | 7.10                 | 17.95                           | <0.0001 | 0.0039               |
| <a href="#">ENSG00000184371</a> | CSF1              | colony stimulating factor 1 [Source:HGNC Symbol;Acc:HGNC:2432]                          | protein coding | 0.35                                    | 4.45                 | 10.75                           | 0.001   | 0.0425               |
| <a href="#">ENSG00000103855</a> | CD276             | CD276 molecule [Source:HGNC Symbol;Acc:HGNC:19137]                                      | protein coding | -0.35                                   | 5.22                 | 11.21                           | 0.0008  | 0.0375               |
| <a href="#">ENSG00000088256</a> | GNA11             | G protein subunit alpha 11 [Source:HGNC Symbol;Acc:HGNC:4379]                           | protein coding | -0.35                                   | 3.71                 | 15.56                           | <0.0001 | 0.0089               |
| <a href="#">ENSG00000221866</a> | PLXNA4            | plexin A4 [Source:HGNC Symbol;Acc:HGNC:9102]                                            | protein coding | 0.35                                    | 3.04                 | 11.94                           | 0.0006  | 0.029                |
| <a href="#">ENSG00000186431</a> | FCAR              | Fc fragment of IgA receptor [Source:HGNC Symbol;Acc:HGNC:3608]                          | protein coding | -0.35                                   | 6.66                 | 11.00                           | 0.0009  | 0.0392               |
| <a href="#">ENSG00000283787</a> |                   |                                                                                         | protein coding | 0.34                                    | 3.68                 | 14.89                           | 0.0001  | 0.011                |
| <a href="#">ENSG00000267737</a> |                   |                                                                                         | lincRNA        | -0.34                                   | 2.41                 | 11.65                           | 0.0006  | 0.0321               |
| <a href="#">ENSG00000090376</a> | IRAK3             | interleukin 1 receptor associated kinase 3 [Source:HGNC Symbol;Acc:HGNC:17020]          | protein coding | -0.34                                   | 7.55                 | 16.03                           | <0.0001 | 0.008                |
| <a href="#">ENSG00000127507</a> | ADGRE2            | adhesion G protein-coupled receptor E2 [Source:HGNC Symbol;Acc:HGNC:3337]               | protein coding | -0.34                                   | 7.08                 | 15.91                           | <0.0001 | 0.008                |
| <a href="#">ENSG00000138111</a> | MFSD13A           | major facilitator superfamily domain containing 13A [Source:HGNC Symbol;Acc:HGNC:26196] | protein coding | -0.34                                   | 3.60                 | 11.13                           | 0.0008  | 0.038                |
| <a href="#">ENSG00000171105</a> | INSR              | insulin receptor [Source:HGNC Symbol;Acc:HGNC:6091]                                     | protein coding | -0.34                                   | 3.66                 | 11.01                           | 0.0009  | 0.0392               |
| <a href="#">ENSG00000059728</a> | MXD1              | MAX dimerization protein 1 [Source:HGNC Symbol;Acc:HGNC:6761]                           | protein coding | -0.34                                   | 8.59                 | 14.25                           | 0.0002  | 0.0132               |

**Supplementary Table 11:** Genes differentially expressed at day 28 post-second vaccination compared to day 0 (RNA-Seq). Sorted by descending absolute  $\log_2$  fold change (Day 28 post-second vaccination vs. Day 0). Gene model summaries and annotations are based on Ensembl Version 90 (August 2017) (continued).

| Ensembl Gene ID                 | Ensembl Gene Name | Ensembl Gene Description                                                                   | Gene Type      | $\log_2$ Fold Change (Day 28 vs. Day 0) | Average $\log_2$ CPM | Likelihood Ratio Test Statistic | P-Value | FDR Adjusted P-Value |
|---------------------------------|-------------------|--------------------------------------------------------------------------------------------|----------------|-----------------------------------------|----------------------|---------------------------------|---------|----------------------|
| <a href="#">ENSG00000100284</a> | TOM1              | target of myb1 membrane trafficking protein [Source:HGNC Symbol;Acc:HGNC:11982]            | protein coding | -0.34                                   | 7.77                 | 22.77                           | <0.0001 | 0.0007               |
| <a href="#">ENSG00000125505</a> | MBOAT7            | membrane bound O-acyltransferase domain containing 7 [Source:HGNC Symbol;Acc:HGNC:15505]   | protein coding | -0.34                                   | 7.36                 | 14.43                           | 0.0001  | 0.0128               |
| <a href="#">ENSG00000164023</a> | SGMS2             | sphingomyelin synthase 2 [Source:HGNC Symbol;Acc:HGNC:28395]                               | protein coding | -0.34                                   | 4.12                 | 13.15                           | 0.0003  | 0.0193               |
| <a href="#">ENSG00000197712</a> | FAM114A1          | family with sequence similarity 114 member A1 [Source:HGNC Symbol;Acc:HGNC:25087]          | protein coding | -0.34                                   | 3.25                 | 11.03                           | 0.0009  | 0.0391               |
| <a href="#">ENSG00000196083</a> | IL1RAP            | interleukin 1 receptor accessory protein [Source:HGNC Symbol;Acc:HGNC:5995]                | protein coding | -0.34                                   | 4.65                 | 13.02                           | 0.0003  | 0.0202               |
| <a href="#">ENSG00000182022</a> | CHST15            | carbohydrate sulfotransferase 15 [Source:HGNC Symbol;Acc:HGNC:18137]                       | protein coding | -0.34                                   | 7.48                 | 15.18                           | <0.0001 | 0.0101               |
| <a href="#">ENSG00000104763</a> | ASAH1             | N-acylsphingosine amidohydrolase 1 [Source:HGNC Symbol;Acc:HGNC:735]                       | protein coding | -0.33                                   | 7.92                 | 10.88                           | 0.001   | 0.0408               |
| <a href="#">ENSG00000155099</a> | TMEM55A           | transmembrane protein 55A [Source:HGNC Symbol;Acc:HGNC:25452]                              | protein coding | -0.33                                   | 3.16                 | 11.59                           | 0.0007  | 0.0327               |
| <a href="#">ENSG00000104974</a> | LILRA1            | leukocyte immunoglobulin like receptor A1 [Source:HGNC Symbol;Acc:HGNC:6602]               | protein coding | -0.33                                   | 6.44                 | 15.90                           | <0.0001 | 0.008                |
| <a href="#">ENSG00000111321</a> | LTBR              | lymphotoxin beta receptor [Source:HGNC Symbol;Acc:HGNC:6718]                               | protein coding | -0.33                                   | 5.99                 | 17.93                           | <0.0001 | 0.0039               |
| <a href="#">ENSG00000169403</a> | PTAFR             | platelet activating factor receptor [Source:HGNC Symbol;Acc:HGNC:9582]                     | protein coding | -0.33                                   | 8.77                 | 12.00                           | 0.0005  | 0.0285               |
| <a href="#">ENSG00000006118</a> | TMEM132A          | transmembrane protein 132A [Source:HGNC Symbol;Acc:HGNC:31092]                             | protein coding | -0.33                                   | 4.67                 | 19.82                           | <0.0001 | 0.0019               |
| <a href="#">ENSG00000143067</a> | ZNF697            | zinc finger protein 697 [Source:HGNC Symbol;Acc:HGNC:32034]                                | protein coding | -0.33                                   | 4.93                 | 13.08                           | 0.0003  | 0.0197               |
| <a href="#">ENSG00000116962</a> | NID1              | nidogen 1 [Source:HGNC Symbol;Acc:HGNC:7821]                                               | protein coding | -0.32                                   | 4.36                 | 11.51                           | 0.0007  | 0.0335               |
| <a href="#">ENSG00000113719</a> | ERGIC1            | endoplasmic reticulum-golgi intermediate compartment 1 [Source:HGNC Symbol;Acc:HGNC:29205] | protein coding | -0.32                                   | 8.31                 | 16.91                           | <0.0001 | 0.0057               |
| <a href="#">ENSG00000105810</a> | CDK6              | cyclin dependent kinase 6 [Source:HGNC Symbol;Acc:HGNC:1777]                               | protein coding | 0.32                                    | 6.29                 | 19.85                           | <0.0001 | 0.0019               |
| <a href="#">ENSG00000084234</a> | APLP2             | amyloid beta precursor like protein 2 [Source:HGNC Symbol;Acc:HGNC:598]                    | protein coding | -0.32                                   | 8.61                 | 11.00                           | 0.0009  | 0.0392               |



**Supplementary Table 11:** Genes differentially expressed at day 28 post-second vaccination compared to day 0 (RNA-Seq). Sorted by descending absolute  $\log_2$  fold change (Day 28 post-second vaccination vs. Day 0). Gene model summaries and annotations are based on Ensembl Version 90 (August 2017) (continued).

| Ensembl Gene ID                 | Ensembl Gene Name | Ensembl Gene Description                                                               | Gene Type      | $\log_2$ Fold Change (Day 28 vs. Day 0) | Average $\log_2$ CPM | Likelihood Ratio Test Statistic | P-Value | FDR Adjusted P-Value |
|---------------------------------|-------------------|----------------------------------------------------------------------------------------|----------------|-----------------------------------------|----------------------|---------------------------------|---------|----------------------|
| <a href="#">ENSG00000140859</a> | KIFC3             | kinesin family member C3 [Source:HGNC Symbol;Acc:HGNC:6326]                            | protein coding | -0.32                                   | 6.35                 | 13.25                           | 0.0003  | 0.0189               |
| <a href="#">ENSG00000095383</a> | TBC1D2            | TBC1 domain family member 2 [Source:HGNC Symbol;Acc:HGNC:18026]                        | protein coding | -0.32                                   | 5.68                 | 19.60                           | <0.0001 | 0.0021               |
| <a href="#">ENSG00000174837</a> | ADGRE1            | adhesion G protein-coupled receptor E1 [Source:HGNC Symbol;Acc:HGNC:3336]              | protein coding | -0.32                                   | 8.31                 | 10.96                           | 0.0009  | 0.0398               |
| <a href="#">ENSG00000100450</a> | GZMH              | granzyme H [Source:HGNC Symbol;Acc:HGNC:4710]                                          | protein coding | 0.32                                    | 5.34                 | 11.48                           | 0.0007  | 0.034                |
| <a href="#">ENSG00000168389</a> | MFSD2A            | major facilitator superfamily domain containing 2A [Source:HGNC Symbol;Acc:HGNC:25897] | protein coding | -0.32                                   | 4.42                 | 10.56                           | 0.0012  | 0.0454               |
| <a href="#">ENSG00000135636</a> | DYSF              | dysferlin [Source:HGNC Symbol;Acc:HGNC:3097]                                           | protein coding | -0.32                                   | 4.90                 | 18.01                           | <0.0001 | 0.0039               |
| <a href="#">ENSG00000070614</a> | NDST1             | N-deacetylase and N-sulfotransferase 1 [Source:HGNC Symbol;Acc:HGNC:7680]              | protein coding | -0.32                                   | 6.01                 | 14.85                           | 0.0001  | 0.0111               |
| <a href="#">ENSG00000165886</a> | UBTD1             | ubiquitin domain containing 1 [Source:HGNC Symbol;Acc:HGNC:25683]                      | protein coding | -0.32                                   | 3.87                 | 10.88                           | 0.001   | 0.0408               |
| <a href="#">ENSG00000137462</a> | TLR2              | toll like receptor 2 [Source:HGNC Symbol;Acc:HGNC:11848]                               | protein coding | -0.32                                   | 8.49                 | 14.20                           | 0.0002  | 0.0133               |
| <a href="#">ENSG00000145632</a> | PLK2              | polo like kinase 2 [Source:HGNC Symbol;Acc:HGNC:19699]                                 | protein coding | -0.32                                   | 3.27                 | 12.69                           | 0.0004  | 0.0226               |
| <a href="#">ENSG00000060982</a> | BCAT1             | branched chain amino acid transaminase 1 [Source:HGNC Symbol;Acc:HGNC:976]             | protein coding | -0.32                                   | 7.85                 | 11.79                           | 0.0006  | 0.0303               |
| <a href="#">ENSG00000156642</a> | NPTN              | neuroplastin [Source:HGNC Symbol;Acc:HGNC:17867]                                       | protein coding | -0.32                                   | 8.07                 | 10.68                           | 0.0011  | 0.0433               |
| <a href="#">ENSG00000169252</a> | ADRB2             | adrenoceptor beta 2 [Source:HGNC Symbol;Acc:HGNC:286]                                  | protein coding | -0.32                                   | 4.20                 | 11.08                           | 0.0009  | 0.0383               |
| <a href="#">ENSG00000179630</a> | LACC1             | laccase domain containing 1 [Source:HGNC Symbol;Acc:HGNC:26789]                        | protein coding | -0.32                                   | 5.81                 | 10.98                           | 0.0009  | 0.0394               |
| <a href="#">ENSG00000170542</a> | SERPINB9          | serpin family B member 9 [Source:HGNC Symbol;Acc:HGNC:8955]                            | protein coding | -0.31                                   | 9.33                 | 12.07                           | 0.0005  | 0.0282               |
| <a href="#">ENSG00000135838</a> | NPL               | N-acetylneuraminate pyruvate lyase [Source:HGNC Symbol;Acc:HGNC:16781]                 | protein coding | -0.31                                   | 6.03                 | 12.50                           | 0.0004  | 0.0241               |
| <a href="#">ENSG00000177628</a> | GBA               | glucosylceramidase beta [Source:HGNC Symbol;Acc:HGNC:4177]                             | protein coding | -0.31                                   | 6.04                 | 16.01                           | <0.0001 | 0.008                |

**Supplementary Table 11:** Genes differentially expressed at day 28 post-second vaccination compared to day 0 (RNA-Seq). Sorted by descending absolute  $\log_2$  fold change (Day 28 post-second vaccination vs. Day 0). Gene model summaries and annotations are based on Ensembl Version 90 (August 2017) (continued).

| Ensembl Gene ID                 | Ensembl Gene Name | Ensembl Gene Description                                                              | Gene Type      | $\log_2$ Fold Change (Day 28 vs. Day 0) | Average $\log_2$ CPM | Likelihood Ratio Test Statistic | P-Value | FDR Adjusted P-Value |
|---------------------------------|-------------------|---------------------------------------------------------------------------------------|----------------|-----------------------------------------|----------------------|---------------------------------|---------|----------------------|
| <a href="#">ENSG00000134532</a> | SOX5              | SRY-box 5 [Source:HGNC Symbol;Acc:HGNC:11201]                                         | protein coding | -0.31                                   | 4.64                 | 12.69                           | 0.0004  | 0.0226               |
| <a href="#">ENSG00000107104</a> | KANK1             | KN motif and ankyrin repeat domains 1 [Source:HGNC Symbol;Acc:HGNC:19309]             | protein coding | -0.31                                   | 6.78                 | 11.82                           | 0.0006  | 0.0301               |
| <a href="#">ENSG00000059377</a> | TBXAS1            | thromboxane A synthase 1 [Source:HGNC Symbol;Acc:HGNC:11609]                          | protein coding | -0.31                                   | 4.86                 | 11.55                           | 0.0007  | 0.033                |
| <a href="#">ENSG00000039319</a> | ZFYVE16           | zinc finger FYVE-type containing 16 [Source:HGNC Symbol;Acc:HGNC:20756]               | protein coding | -0.31                                   | 6.71                 | 18.70                           | <0.0001 | 0.0029               |
| <a href="#">ENSG00000163235</a> | TGFA              | transforming growth factor alpha [Source:HGNC Symbol;Acc:HGNC:11765]                  | protein coding | -0.31                                   | 6.12                 | 14.44                           | 0.0001  | 0.0128               |
| <a href="#">ENSG00000118971</a> | CCND2             | cyclin D2 [Source:HGNC Symbol;Acc:HGNC:1583]                                          | protein coding | 0.31                                    | 8.38                 | 13.90                           | 0.0002  | 0.0148               |
| <a href="#">ENSG00000142657</a> | PGD               | phosphogluconate dehydrogenase [Source:HGNC Symbol;Acc:HGNC:8891]                     | protein coding | -0.31                                   | 9.11                 | 11.16                           | 0.0008  | 0.0379               |
| <a href="#">ENSG00000198363</a> | ASPH              | aspartate beta-hydroxylase [Source:HGNC Symbol;Acc:HGNC:757]                          | protein coding | -0.31                                   | 6.73                 | 11.38                           | 0.0007  | 0.0351               |
| <a href="#">ENSG00000091436</a> | MAP3K20           | mitogen-activated protein kinase kinase kinase 20 [Source:HGNC Symbol;Acc:HGNC:17797] | protein coding | -0.31                                   | 6.69                 | 12.79                           | 0.0003  | 0.022                |
| <a href="#">ENSG00000133961</a> | NUMB              | NUMB, endocytic adaptor protein [Source:HGNC Symbol;Acc:HGNC:8060]                    | protein coding | -0.31                                   | 6.65                 | 20.99                           | <0.0001 | 0.0014               |
| <a href="#">ENSG00000120162</a> | MOB3B             | MOB kinase activator 3B [Source:HGNC Symbol;Acc:HGNC:23825]                           | protein coding | -0.31                                   | 3.15                 | 13.66                           | 0.0002  | 0.0161               |
| <a href="#">ENSG00000160746</a> | ANO10             | anoctamin 10 [Source:HGNC Symbol;Acc:HGNC:25519]                                      | protein coding | -0.31                                   | 4.31                 | 17.61                           | <0.0001 | 0.0044               |
| <a href="#">ENSG00000104972</a> | LILRB1            | leukocyte immunoglobulin like receptor B1 [Source:HGNC Symbol;Acc:HGNC:6605]          | protein coding | -0.31                                   | 8.63                 | 10.79                           | 0.001   | 0.0419               |
| <a href="#">ENSG00000197965</a> | MPZL1             | myelin protein zero like 1 [Source:HGNC Symbol;Acc:HGNC:7226]                         | protein coding | -0.31                                   | 6.37                 | 14.31                           | 0.0002  | 0.0132               |
| <a href="#">ENSG00000148926</a> | ADM               | adrenomedullin [Source:HGNC Symbol;Acc:HGNC:259]                                      | protein coding | -0.30                                   | 7.49                 | 11.56                           | 0.0007  | 0.033                |
| <a href="#">ENSG00000107551</a> | RASSF4            | Ras association domain family member 4 [Source:HGNC Symbol;Acc:HGNC:20793]            | protein coding | -0.30                                   | 6.55                 | 13.28                           | 0.0003  | 0.0188               |
| <a href="#">ENSG00000167995</a> | BEST1             | bestrophin 1 [Source:HGNC Symbol;Acc:HGNC:12703]                                      | protein coding | -0.30                                   | 5.37                 | 15.41                           | <0.0001 | 0.0092               |

**Supplementary Table 11:** Genes differentially expressed at day 28 post-second vaccination compared to day 0 (RNA-Seq). Sorted by descending absolute  $\log_2$  fold change (Day 28 post-second vaccination vs. Day 0). Gene model summaries and annotations are based on Ensembl Version 90 (August 2017) (continued).

| Ensembl Gene ID                 | Ensembl Gene Name | Ensembl Gene Description                                                         | Gene Type      | $\log_2$ Fold Change (Day 28 vs. Day 0) | Average $\log_2$ CPM | Likelihood Ratio Test Statistic | P-Value | FDR Adjusted P-Value |
|---------------------------------|-------------------|----------------------------------------------------------------------------------|----------------|-----------------------------------------|----------------------|---------------------------------|---------|----------------------|
| <a href="#">ENSG00000175066</a> | GK5               | glycerol kinase 5 (putative) [Source:HGNC Symbol;Acc:HGNC:28635]                 | protein coding | -0.30                                   | 5.92                 | 14.80                           | 0.0001  | 0.0112               |
| <a href="#">ENSG00000140678</a> | ITGAX             | integrin subunit alpha X [Source:HGNC Symbol;Acc:HGNC:6152]                      | protein coding | -0.30                                   | 7.03                 | 16.49                           | <0.0001 | 0.0067               |
| <a href="#">ENSG00000186818</a> | LILRB4            | leukocyte immunoglobulin like receptor B4 [Source:HGNC Symbol;Acc:HGNC:6608]     | protein coding | -0.30                                   | 8.46                 | 10.63                           | 0.0011  | 0.0441               |
| <a href="#">ENSG00000113269</a> | RNF130            | ring finger protein 130 [Source:HGNC Symbol;Acc:HGNC:18280]                      | protein coding | -0.30                                   | 6.84                 | 13.28                           | 0.0003  | 0.0188               |
| <a href="#">ENSG00000133805</a> | AMPD3             | adenosine monophosphate deaminase 3 [Source:HGNC Symbol;Acc:HGNC:470]            | protein coding | -0.30                                   | 7.40                 | 17.18                           | <0.0001 | 0.0052               |
| <a href="#">ENSG00000120949</a> | TNFRSF8           | TNF receptor superfamily member 8 [Source:HGNC Symbol;Acc:HGNC:11923]            | protein coding | -0.30                                   | 5.36                 | 12.18                           | 0.0005  | 0.0275               |
| <a href="#">ENSG00000119900</a> | OGFRL1            | opioid growth factor receptor like 1 [Source:HGNC Symbol;Acc:HGNC:21378]         | protein coding | -0.30                                   | 7.63                 | 15.99                           | <0.0001 | 0.008                |
| <a href="#">ENSG00000149798</a> | CDC42EP2          | CDC42 effector protein 2 [Source:HGNC Symbol;Acc:HGNC:16263]                     | protein coding | -0.30                                   | 6.27                 | 17.16                           | <0.0001 | 0.0052               |
| <a href="#">ENSG00000136630</a> | HLX               | H2.0 like homeobox [Source:HGNC Symbol;Acc:HGNC:4978]                            | protein coding | -0.30                                   | 6.56                 | 14.70                           | 0.0001  | 0.0114               |
| <a href="#">ENSG00000143570</a> | SLC39A1           | solute carrier family 39 member 1 [Source:HGNC Symbol;Acc:HGNC:12876]            | protein coding | -0.29                                   | 8.14                 | 12.81                           | 0.0003  | 0.0219               |
| <a href="#">ENSG00000119408</a> | NEK6              | NIMA related kinase 6 [Source:HGNC Symbol;Acc:HGNC:7749]                         | protein coding | -0.29                                   | 4.62                 | 14.62                           | 0.0001  | 0.0118               |
| <a href="#">ENSG00000198719</a> | DLL1              | delta like canonical Notch ligand 1 [Source:HGNC Symbol;Acc:HGNC:2908]           | protein coding | -0.29                                   | 5.08                 | 10.72                           | 0.0011  | 0.0429               |
| <a href="#">ENSG00000056972</a> | TRAF3IP2          | TRAF3 interacting protein 2 [Source:HGNC Symbol;Acc:HGNC:1343]                   | protein coding | -0.29                                   | 6.43                 | 21.81                           | <0.0001 | 0.001                |
| <a href="#">ENSG00000005238</a> | FAM214B           | family with sequence similarity 214 member B [Source:HGNC Symbol;Acc:HGNC:25666] | protein coding | -0.29                                   | 6.07                 | 20.80                           | <0.0001 | 0.0014               |
| <a href="#">ENSG00000105355</a> | PLIN3             | perilipin 3 [Source:HGNC Symbol;Acc:HGNC:16893]                                  | protein coding | -0.29                                   | 6.36                 | 13.62                           | 0.0002  | 0.0162               |
| <a href="#">ENSG00000135678</a> | CPM               | carboxypeptidase M [Source:HGNC Symbol;Acc:HGNC:2311]                            | protein coding | -0.29                                   | 5.71                 | 10.36                           | 0.0013  | 0.0485               |

**Supplementary Table 11:** Genes differentially expressed at day 28 post-second vaccination compared to day 0 (RNA-Seq). Sorted by descending absolute  $\log_2$  fold change (Day 28 post-second vaccination vs. Day 0). Gene model summaries and annotations are based on Ensembl Version 90 (August 2017) (continued).

| Ensembl Gene ID                 | Ensembl Gene Name | Ensembl Gene Description                                                                      | Gene Type      | $\log_2$ Fold Change (Day 28 vs. Day 0) | Average $\log_2$ CPM | Likelihood Ratio Test Statistic | P-Value | FDR Adjusted P-Value |
|---------------------------------|-------------------|-----------------------------------------------------------------------------------------------|----------------|-----------------------------------------|----------------------|---------------------------------|---------|----------------------|
| <a href="#">ENSG00000117090</a> | SLAMF1            | signaling lymphocytic activation molecule family member 1 [Source:HGNC Symbol;Acc:HGNC:10903] | protein coding | -0.29                                   | 8.13                 | 11.93                           | 0.0006  | 0.029                |
| <a href="#">ENSG00000142192</a> | APP               | amyloid beta precursor protein [Source:HGNC Symbol;Acc:HGNC:620]                              | protein coding | -0.29                                   | 7.03                 | 11.83                           | 0.0006  | 0.0301               |
| <a href="#">ENSG0000006432</a>  | MAP3K9            | mitogen-activated protein kinase kinase kinase 9 [Source:HGNC Symbol;Acc:HGNC:6861]           | protein coding | 0.29                                    | 3.65                 | 10.35                           | 0.0013  | 0.0485               |
| <a href="#">ENSG00000158186</a> | MRAS              | muscle RAS oncogene homolog [Source:HGNC Symbol;Acc:HGNC:7227]                                | protein coding | -0.29                                   | 4.89                 | 12.10                           | 0.0005  | 0.0282               |
| <a href="#">ENSG00000136052</a> | SLC41A2           | solute carrier family 41 member 2 [Source:HGNC Symbol;Acc:HGNC:31045]                         | protein coding | -0.28                                   | 6.70                 | 12.88                           | 0.0003  | 0.0213               |
| <a href="#">ENSG00000273749</a> | CYFIP1            | cytoplasmic FMR1 interacting protein 1 [Source:HGNC Symbol;Acc:HGNC:13759]                    | protein coding | -0.28                                   | 7.06                 | 12.47                           | 0.0004  | 0.0243               |
| <a href="#">ENSG00000204577</a> | LILRB3            | leukocyte immunoglobulin like receptor B3 [Source:HGNC Symbol;Acc:HGNC:6607]                  | protein coding | -0.28                                   | 6.33                 | 12.02                           | 0.0005  | 0.0285               |
| <a href="#">ENSG00000110880</a> | CORO1C            | coronin 1C [Source:HGNC Symbol;Acc:HGNC:2254]                                                 | protein coding | -0.28                                   | 6.76                 | 15.16                           | <0.0001 | 0.0101               |
| <a href="#">ENSG00000139629</a> | GALNT6            | polypeptide N-acetylgalactosaminyltransferase 6 [Source:HGNC Symbol;Acc:HGNC:4128]            | protein coding | -0.28                                   | 5.88                 | 11.20                           | 0.0008  | 0.0375               |
| <a href="#">ENSG00000161638</a> | ITGA5             | integrin subunit alpha 5 [Source:HGNC Symbol;Acc:HGNC:6141]                                   | protein coding | -0.28                                   | 8.56                 | 13.88                           | 0.0002  | 0.0149               |
| <a href="#">ENSG00000066697</a> | MSANTD3           | Myb/SANT DNA binding domain containing 3 [Source:HGNC Symbol;Acc:HGNC:23370]                  | protein coding | -0.28                                   | 5.40                 | 14.27                           | 0.0002  | 0.0132               |
| <a href="#">ENSG0000006534</a>  | ALDH3B1           | aldehyde dehydrogenase 3 family member B1 [Source:HGNC Symbol;Acc:HGNC:410]                   | protein coding | -0.28                                   | 5.16                 | 14.34                           | 0.0002  | 0.0132               |
| <a href="#">ENSG00000133612</a> | AGAP3             | ArfGAP with GTPase domain, ankyrin repeat and PH domain 3 [Source:HGNC Symbol;Acc:HGNC:16923] | protein coding | -0.28                                   | 6.81                 | 17.77                           | <0.0001 | 0.0042               |
| <a href="#">ENSG00000145685</a> | LHFPL2            | LHFPL tetraspan subfamily member 2 [Source:HGNC Symbol;Acc:HGNC:6588]                         | protein coding | -0.28                                   | 8.67                 | 11.62                           | 0.0007  | 0.0326               |
| <a href="#">ENSG00000146094</a> | DOK3              | docking protein 3 [Source:HGNC Symbol;Acc:HGNC:24583]                                         | protein coding | -0.28                                   | 5.97                 | 17.47                           | <0.0001 | 0.0046               |

**Supplementary Table 11:** Genes differentially expressed at day 28 post-second vaccination compared to day 0 (RNA-Seq). Sorted by descending absolute  $\log_2$  fold change (Day 28 post-second vaccination vs. Day 0). Gene model summaries and annotations are based on Ensembl Version 90 (August 2017) (continued).

| Ensembl Gene ID                 | Ensembl Gene Name | Ensembl Gene Description                                                                                       | Gene Type      | $\log_2$ Fold Change (Day 28 vs. Day 0) | Average $\log_2$ CPM | Likelihood Ratio Test Statistic | P-Value | FDR Adjusted P-Value |
|---------------------------------|-------------------|----------------------------------------------------------------------------------------------------------------|----------------|-----------------------------------------|----------------------|---------------------------------|---------|----------------------|
| <a href="#">ENSG00000148288</a> | GBGT1             | globoside alpha-1,3-N-acetylgalactosaminyltransferase 1 (FORS blood group) [Source:HGNC Symbol;Acc:HGNC:20460] | protein coding | -0.28                                   | 4.91                 | 16.63                           | <0.0001 | 0.0063               |
| <a href="#">ENSG00000100600</a> | LGMN              | legumain [Source:HGNC Symbol;Acc:HGNC:9472]                                                                    | protein coding | -0.28                                   | 5.29                 | 13.18                           | 0.0003  | 0.0193               |
| <a href="#">ENSG00000180061</a> | TMEM150B          | transmembrane protein 150B [Source:HGNC Symbol;Acc:HGNC:34415]                                                 | protein coding | -0.28                                   | 5.56                 | 14.80                           | 0.0001  | 0.0112               |
| <a href="#">ENSG00000033627</a> | ATP6V0A1          | ATPase H <sup>+</sup> transporting V0 subunit a1 [Source:HGNC Symbol;Acc:HGNC:865]                             | protein coding | -0.28                                   | 4.81                 | 14.10                           | 0.0002  | 0.0137               |
| <a href="#">ENSG00000135912</a> | TTLL4             | tubulin tyrosine ligase like 4 [Source:HGNC Symbol;Acc:HGNC:28976]                                             | protein coding | -0.27                                   | 4.99                 | 14.84                           | 0.0001  | 0.0111               |
| <a href="#">ENSG00000241839</a> | PLEKHO2           | pleckstrin homology domain containing O2 [Source:HGNC Symbol;Acc:HGNC:30026]                                   | protein coding | -0.27                                   | 8.30                 | 12.21                           | 0.0005  | 0.0271               |
| <a href="#">ENSG00000161921</a> | CXCL16            | C-X-C motif chemokine ligand 16 [Source:HGNC Symbol;Acc:HGNC:16642]                                            | protein coding | -0.27                                   | 6.74                 | 10.41                           | 0.0013  | 0.0479               |
| <a href="#">ENSG00000256235</a> | SMIM3             | small integral membrane protein 3 [Source:HGNC Symbol;Acc:HGNC:30248]                                          | protein coding | -0.27                                   | 6.54                 | 13.68                           | 0.0002  | 0.0161               |
| <a href="#">ENSG00000135862</a> | LAMC1             | laminin subunit gamma 1 [Source:HGNC Symbol;Acc:HGNC:6492]                                                     | protein coding | -0.27                                   | 4.53                 | 16.71                           | <0.0001 | 0.0062               |
| <a href="#">ENSG00000157557</a> | ETS2              | ETS proto-oncogene 2, transcription factor [Source:HGNC Symbol;Acc:HGNC:3489]                                  | protein coding | -0.27                                   | 8.50                 | 10.47                           | 0.0012  | 0.0465               |
| <a href="#">ENSG00000052795</a> | FNIP2             | folliculin interacting protein 2 [Source:HGNC Symbol;Acc:HGNC:29280]                                           | protein coding | -0.27                                   | 7.87                 | 12.64                           | 0.0004  | 0.0227               |
| <a href="#">ENSG00000186350</a> | RXRA              | retinoid X receptor alpha [Source:HGNC Symbol;Acc:HGNC:10477]                                                  | protein coding | -0.27                                   | 6.89                 | 14.22                           | 0.0002  | 0.0132               |
| <a href="#">ENSG00000067182</a> | TNFRSF1A          | TNF receptor superfamily member 1A [Source:HGNC Symbol;Acc:HGNC:11916]                                         | protein coding | -0.27                                   | 7.40                 | 14.06                           | 0.0002  | 0.0138               |
| <a href="#">ENSG00000135046</a> | ANXA1             | annexin A1 [Source:HGNC Symbol;Acc:HGNC:533]                                                                   | protein coding | -0.27                                   | 8.34                 | 11.25                           | 0.0008  | 0.037                |
| <a href="#">ENSG00000030419</a> | IKZF2             | IKAROS family zinc finger 2 [Source:HGNC Symbol;Acc:HGNC:13177]                                                | protein coding | 0.26                                    | 5.82                 | 22.42                           | <0.0001 | 0.0009               |
| <a href="#">ENSG00000135318</a> | NT5E              | 5'-nucleotidase ecto [Source:HGNC Symbol;Acc:HGNC:8021]                                                        | protein coding | -0.26                                   | 4.49                 | 11.96                           | 0.0005  | 0.0289               |
| <a href="#">ENSG00000213625</a> | LEPROT            | leptin receptor overlapping transcript [Source:HGNC Symbol;Acc:HGNC:29477]                                     | protein coding | -0.26                                   | 6.31                 | 12.26                           | 0.0005  | 0.0266               |

**Supplementary Table 11:** Genes differentially expressed at day 28 post-second vaccination compared to day 0 (RNA-Seq). Sorted by descending absolute  $\log_2$  fold change (Day 28 post-second vaccination vs. Day 0). Gene model summaries and annotations are based on Ensembl Version 90 (August 2017) (continued).

| Ensembl Gene ID                 | Ensembl Gene Name | Ensembl Gene Description                                         | Gene Type      | $\log_2$ Fold Change (Day 28 vs. Day 0) | Average $\log_2$ CPM | Likelihood Ratio Test Statistic | P-Value | FDR Adjusted P-Value |
|---------------------------------|-------------------|------------------------------------------------------------------|----------------|-----------------------------------------|----------------------|---------------------------------|---------|----------------------|
| <a href="#">ENSG00000091073</a> | DTX2              | deltex E3 ubiquitin ligase 2 [Source:HGNC Symbol;Acc:HGNC:15973] | protein coding | -0.26                                   | 4.82                 | 10.88                           | 0.001   | 0.0408               |
|                                 |                   |                                                                  |                |                                         |                      |                                 |         |                      |

**Supplementary Table 12:** KEGG Pathways enriched in differentially expressed genes at Day 14 post-second vaccination compared to pre-first vaccination (RNA-Seq). Results are sorted by FDR adjusted p-value and Jaccard similarity index. To determine significantly enriched gene sets, DE genes were used.

| Gene Set Name                                          | Gene Set Genes # | DE Genes N (%) | Up-reg. DE Genes N (%) | Down-reg. DE Genes N (%) | Jaccard Index | P-Value | FDR Adjusted P-Value |
|--------------------------------------------------------|------------------|----------------|------------------------|--------------------------|---------------|---------|----------------------|
| <a href="#">Cytokine-cytokine receptor interaction</a> | 257              | 22 (8.6)       | 12 (4.7)               | 10 (3.9)                 | 0.038         | <0.0001 | 0.0016               |
| <a href="#">Fluid shear stress and atherosclerosis</a> | 137              | 15 (10.9)      | 2 (1.5)                | 13 (9.5)                 | 0.033         | <0.0001 | 0.0016               |
| <a href="#">Osteoclast differentiation</a>             | 124              | 13 (10.5)      | 2 (1.6)                | 11 (8.9)                 | 0.029         | <0.0001 | 0.0021               |
| <a href="#">Jak-STAT signaling pathway</a>             | 155              | 11 (7.1)       | 7 (4.5)                | 4 (2.6)                  | 0.023         | 0.0003  | 0.018                |
| <a href="#">Complement and coagulation cascades</a>    | 76               | 8 (10.5)       | 0 (0)                  | 8 (10.5)                 | 0.020         | 0.0003  | 0.018                |
| <a href="#">Staphylococcus aureus infection</a>        | 52               | 6 (11.5)       | 0 (0)                  | 6 (11.5)                 | 0.016         | 0.0008  | 0.0412               |
| <a href="#">Proteoglycans in cancer</a>                | 200              | 13 (6.5)       | 0 (0)                  | 13 (6.5)                 | 0.025         | 0.0011  | 0.0437               |
| <a href="#">Tuberculosis</a>                           | 172              | 11 (6.4)       | 2 (1.2)                | 9 (5.2)                  | 0.022         | 0.001   | 0.0437               |

**Supplementary Table 13:** MSigDB Reactome Pathways enriched in differentially expressed genes at Day 14 post-second vaccination compared to pre-first vaccination (RNA-Seq). Results are sorted by FDR adjusted p-value and Jaccard similarity index. To determine significantly enriched gene sets, DE genes were used.

| Gene Set Name                                                           | Gene Set Genes # | DE Genes N (%) | Up-reg. DE Genes N (%) | Down-reg. DE Genes N (%) | Jaccard Index | P-Value | FDR Adjusted P-Value |
|-------------------------------------------------------------------------|------------------|----------------|------------------------|--------------------------|---------------|---------|----------------------|
| <a href="#">REACTOME CELL SURFACE INTERACTIONS AT THE VASCULAR WALL</a> | 83               | 9 (10.8)       | 0 (0)                  | 9 (10.8)                 | 0.022         | <0.0001 | 0.0404               |

**Supplementary Table 14:** MSigDB Immunologic Signature Sets enriched in differentially expressed genes at Day 14 post-second vaccination compared to pre-first vaccination (RNA-Seq). Results are sorted by FDR adjusted p-value and Jaccard similarity index. To determine significantly enriched gene sets, DE genes were used. Top 50 results are listed.

| Gene Set Name                                                                   | Gene Set Genes # | DE Genes N (%) | Up-reg. DE Genes N (%) | Down-reg. DE Genes N (%) | Jaccard Index | P-Value | FDR Adjusted P-Value |
|---------------------------------------------------------------------------------|------------------|----------------|------------------------|--------------------------|---------------|---------|----------------------|
| <a href="#">GSE34156 UNTREATED VS 6H TLR1 TLR2 LIGAND TREATED MONOCYTE UP</a>   | 178              | 42 (23.6)      | 0 (0)                  | 42 (23.6)                | 0.089         | <0.0001 | 0.0003               |
| <a href="#">GSE30971 CTRL VS LPS STIM MACROPHAGE WBP7 KO 4H UP</a>              | 171              | 40 (23.4)      | 1 (0.6)                | 39 (22.8)                | 0.086         | <0.0001 | 0.0003               |
| <a href="#">GSE36888 UNTREATED VS IL2 TREATED TCELL 6H UP</a>                   | 178              | 40 (22.5)      | 1 (0.6)                | 39 (21.9)                | 0.084         | <0.0001 | 0.0003               |
| <a href="#">GSE34156 UNTREATED VS 24H NOD2 LIGAND TREATED MONOCYTE DN</a>       | 182              | 40 (22)        | 0 (0)                  | 40 (22)                  | 0.084         | <0.0001 | 0.0003               |
| <a href="#">GSE34156 NOD2 LIGAND VS TLR1 TLR2 LIGAND 6H TREATED MONOCYTE DN</a> | 175              | 39 (22.3)      | 0 (0)                  | 39 (22.3)                | 0.083         | <0.0001 | 0.0003               |
| <a href="#">GSE30971 WBP7 HET VS KO MACROPHAGE DN</a>                           | 180              | 38 (21.1)      | 1 (0.6)                | 37 (20.6)                | 0.079         | <0.0001 | 0.0003               |
| <a href="#">GSE36888 UNTREATED VS IL2 TREATED TCELL 17H DN</a>                  | 180              | 38 (21.1)      | 1 (0.6)                | 37 (20.6)                | 0.079         | <0.0001 | 0.0003               |
| <a href="#">GSE10325 LUPUS BCELL VS LUPUS MYELOID DN</a>                        | 191              | 38 (19.9)      | 0 (0)                  | 38 (19.9)                | 0.078         | <0.0001 | 0.0003               |

**Supplementary Table 14:** MSigDB Immunologic Signature Sets enriched in differentially expressed genes at Day 14 post-second vaccination compared to pre-first vaccination (RNA-Seq). Results are sorted by FDR adjusted p-value and Jaccard similarity index. To determine significantly enriched gene sets, DE genes were used. Top 50 results are listed. (continued)

| Gene Set Name                                                                  | Gene Set Genes # | DE Genes N (%) | Up-reg. DE Genes N (%) | Down-reg. DE Genes N (%) | Jaccard Index | P-Value | FDR Adjusted P-Value |
|--------------------------------------------------------------------------------|------------------|----------------|------------------------|--------------------------|---------------|---------|----------------------|
| GSE30971 WBP7 HET VS KO MACROPHAGE 2H LPS STIM DN                              | 182              | 37 (20.3)      | 1 (0.5)                | 36 (19.8)                | 0.077         | <0.0001 | 0.0003               |
| GSE30971 CTRL VS LPS STIM MACROPHAGE WBP7 KO 2H UP                             | 170              | 36 (21.2)      | 1 (0.6)                | 35 (20.6)                | 0.076         | <0.0001 | 0.0003               |
| GSE29618 MONOCYTE VS PDC UP                                                    | 187              | 37 (19.8)      | 0 (0)                  | 37 (19.8)                | 0.076         | <0.0001 | 0.0003               |
| GSE10325 LUPUS CD4 TCELL VS LUPUS MYELOID DN                                   | 188              | 37 (19.7)      | 0 (0)                  | 37 (19.7)                | 0.076         | <0.0001 | 0.0003               |
| GSE29618 MONOCYTE VS MDC DAY7 FLU VACCINE UP                                   | 188              | 37 (19.7)      | 0 (0)                  | 37 (19.7)                | 0.076         | <0.0001 | 0.0003               |
| GSE29618 MONOCYTE VS MDC UP                                                    | 189              | 37 (19.6)      | 0 (0)                  | 37 (19.6)                | 0.076         | <0.0001 | 0.0003               |
| GSE22886 NAIVE CD8 TCELL VS MONOCYTE DN                                        | 191              | 37 (19.4)      | 0 (0)                  | 37 (19.4)                | 0.075         | <0.0001 | 0.0003               |
| GSE36888 UNTREATED VS IL2 TREATED STAT5 AB KNOCKIN TCELL 2H UP                 | 177              | 35 (19.8)      | 0 (0)                  | 35 (19.8)                | 0.073         | <0.0001 | 0.0003               |
| GSE24634 TREG VS TCONV POST DAY10 IL4 CONVERSION DN                            | 192              | 35 (18.2)      | 0 (0)                  | 35 (18.2)                | 0.071         | <0.0001 | 0.0003               |
| GSE34156 TLR1 TLR2 LIGAND VS NOD2 AND TLR1 TLR2 LIGAND 24H TREATED MONOCYTE... | 179              | 34 (19)        | 0 (0)                  | 34 (19)                  | 0.070         | <0.0001 | 0.0003               |
| GSE36888 UNTREATED VS IL2 TREATED STAT5 AB KNOCKIN TCELL 17H UP                | 172              | 32 (18.6)      | 0 (0)                  | 32 (18.6)                | 0.067         | <0.0001 | 0.0003               |
| GSE36888 UNTREATED VS IL2 TREATED STAT5 AB KNOCKIN TCELL 6H UP                 | 174              | 31 (17.8)      | 1 (0.6)                | 30 (17.2)                | 0.065         | <0.0001 | 0.0003               |
| GSE22886 NAIVE CD4 TCELL VS MONOCYTE DN                                        | 192              | 32 (16.7)      | 0 (0)                  | 32 (16.7)                | 0.064         | <0.0001 | 0.0003               |
| GSE30971 CTRL VS LPS STIM MACROPHAGE WBP7 HET 2H UP                            | 166              | 30 (18.1)      | 1 (0.6)                | 29 (17.5)                | 0.063         | <0.0001 | 0.0003               |
| GSE22886 DAY0 VS DAY1 MONOCYTE IN CULTURE DN                                   | 189              | 31 (16.4)      | 1 (0.5)                | 30 (15.9)                | 0.063         | <0.0001 | 0.0003               |
| GSE29618 MONOCYTE VS PDC DAY7 FLU VACCINE UP                                   | 190              | 31 (16.3)      | 0 (0)                  | 31 (16.3)                | 0.062         | <0.0001 | 0.0003               |
| GSE22886 NAIVE TCELL VS MONOCYTE DN                                            | 191              | 31 (16.2)      | 0 (0)                  | 31 (16.2)                | 0.062         | <0.0001 | 0.0003               |
| GSE6269 FLU VS STAPH AUREUS INF PBMC DN                                        | 158              | 29 (18.4)      | 0 (0)                  | 29 (18.4)                | 0.062         | <0.0001 | 0.0003               |
| GSE6269 HEALTHY VS STAPH PNEUMO INF PBMC DN                                    | 160              | 26 (16.2)      | 0 (0)                  | 26 (16.2)                | 0.055         | <0.0001 | 0.0003               |
| GSE25123 CTRL VS ROSIGLITAZONE STIM PPARG KO MACROPHAGE UP                     | 181              | 27 (14.9)      | 0 (0)                  | 27 (14.9)                | 0.055         | <0.0001 | 0.0003               |
| GSE10325 BCELL VS MYELOID DN                                                   | 183              | 27 (14.8)      | 0 (0)                  | 27 (14.8)                | 0.055         | <0.0001 | 0.0003               |
| GSE24634 TEFF VS TCONV DAY7 IN CULTURE DN                                      | 184              | 27 (14.7)      | 0 (0)                  | 27 (14.7)                | 0.055         | <0.0001 | 0.0003               |
| GSE29618 BCELL VS MONOCYTE DAY7 FLU VACCINE DN                                 | 189              | 27 (14.3)      | 0 (0)                  | 27 (14.3)                | 0.054         | <0.0001 | 0.0003               |
| GSE41176 UNSTIM VS ANTI IGM STIM BCELL 1H UP                                   | 183              | 26 (14.2)      | 0 (0)                  | 26 (14.2)                | 0.053         | <0.0001 | 0.0003               |
| GSE11057 PBMC VS MEM CD4 TCELL UP                                              | 185              | 26 (14.1)      | 0 (0)                  | 26 (14.1)                | 0.052         | <0.0001 | 0.0003               |
| GSE24634 TEFF VS TCONV DAY10 IN CULTURE DN                                     | 185              | 26 (14.1)      | 0 (0)                  | 26 (14.1)                | 0.052         | <0.0001 | 0.0003               |
| GSE29618 BCELL VS MONOCYTE DN                                                  | 187              | 26 (13.9)      | 0 (0)                  | 26 (13.9)                | 0.052         | <0.0001 | 0.0003               |
| GSE25123 WT VS PPARG KO MACROPHAGE UP                                          | 173              | 25 (14.5)      | 0 (0)                  | 25 (14.5)                | 0.051         | <0.0001 | 0.0003               |
| GSE22886 NAIVE BCELL VS MONOCYTE DN                                            | 195              | 26 (13.3)      | 0 (0)                  | 26 (13.3)                | 0.051         | <0.0001 | 0.0003               |
| GSE24634 TEFF VS TCONV DAY3 IN CULTURE DN                                      | 177              | 25 (14.1)      | 0 (0)                  | 25 (14.1)                | 0.051         | <0.0001 | 0.0003               |
| GSE9988 ANTI TREM1 AND LPS VS VEHICLE TREATED MONOCYTES UP                     | 163              | 24 (14.7)      | 1 (0.6)                | 23 (14.1)                | 0.050         | <0.0001 | 0.0003               |
| GSE24634 TREG VS TCONV POST DAY7 IL4 CONVERSION DN                             | 188              | 25 (13.3)      | 0 (0)                  | 25 (13.3)                | 0.050         | <0.0001 | 0.0003               |
| GSE36888 STAT5 AB KNOCKIN VS WT TCELL IL2 TREATED 17H DN                       | 179              | 24 (13.4)      | 0 (0)                  | 24 (13.4)                | 0.049         | <0.0001 | 0.0003               |
| GSE41176 UNSTIM VS ANTI IGM STIM TAK1 KO BCELL 24H DN                          | 179              | 24 (13.4)      | 1 (0.6)                | 23 (12.8)                | 0.049         | <0.0001 | 0.0003               |



**Supplementary Table 14:** MSigDB Immunologic Signature Sets enriched in differentially expressed genes at Day 14 post-second vaccination compared to pre-first vaccination (RNA-Seq). Results are sorted by FDR adjusted p-value and Jaccard similarity index. To determine significantly enriched gene sets, DE genes were used. Top 50 results are listed. (continued)

| Gene Set Name                                                                           | Gene Set Genes # | DE Genes N (%) | Up-reg. DE Genes N (%) | Down-reg. DE Genes N (%) | Jaccard Index | P-Value | FDR Adjusted P-Value |
|-----------------------------------------------------------------------------------------|------------------|----------------|------------------------|--------------------------|---------------|---------|----------------------|
| <a href="#">GSE10325 CD4 TCELL VS MYELOID DN</a>                                        | 185              | 24 (13)        | 0 (0)                  | 24 (13)                  | 0.048         | <0.0001 | 0.0003               |
| <a href="#">GSE22886 DAY1 VS DAY7 MONOCYTE IN CULTURE UP</a>                            | 185              | 24 (13)        | 1 (0.5)                | 23 (12.4)                | 0.048         | <0.0001 | 0.0003               |
| <a href="#">GSE25123 IL4 VS IL4 AND ROSIGLITAZONE STIM PPARG KO MACROPHAGE DAY10 DN</a> | 174              | 23 (13.2)      | 1 (0.6)                | 22 (12.6)                | 0.047         | <0.0001 | 0.0003               |
| <a href="#">GSE41176 UNSTIM VS ANTI IGM STIM BCELL 3H UP</a>                            | 184              | 23 (12.5)      | 0 (0)                  | 23 (12.5)                | 0.046         | <0.0001 | 0.0003               |
| <a href="#">GSE41176 WT VS TAK1 KO ANTI IGM STIM BCELL 3H DN</a>                        | 184              | 23 (12.5)      | 1 (0.5)                | 22 (12)                  | 0.046         | <0.0001 | 0.0003               |
| <a href="#">GSE9988 LPS VS CTRL TREATED MONOCYTE UP</a>                                 | 165              | 22 (13.3)      | 1 (0.6)                | 21 (12.7)                | 0.046         | <0.0001 | 0.0003               |
| <a href="#">GSE9988 LOW LPS VS VEHICLE TREATED MONOCYTE UP</a>                          | 166              | 22 (13.3)      | 0 (0)                  | 22 (13.3)                | 0.046         | <0.0001 | 0.0003               |
| <a href="#">GSE45365 NK CELL VS CD11B DC DN</a>                                         | 191              | 23 (12)        | 2 (1)                  | 21 (11)                  | 0.045         | <0.0001 | 0.0003               |

**Supplementary Table 15:** GO Biological Processes enriched in differentially expressed genes at Day 14 post-second vaccination compared to pre-first vaccination (RNA-Seq). Results are sorted by FDR adjusted p-value and Jaccard similarity index. To determine significantly enriched gene sets, DE genes were used. Top 50 results are listed.

| Gene Set Name                                                               | Gene Set Genes # | DE Genes N (%) | Up-reg. DE Genes N (%) | Down-reg. DE Genes N (%) | Jaccard Index | P-Value | FDR Adjusted P-Value |
|-----------------------------------------------------------------------------|------------------|----------------|------------------------|--------------------------|---------------|---------|----------------------|
| <a href="#">GO IMMUNE RESPONSE</a>                                          | 1028             | 57 (5.5)       | 17 (1.7)               | 40 (3.9)                 | 0.044         | <0.0001 | 0.0009               |
| <a href="#">GO RESPONSE TO MOLECULE OF BACTERIAL ORIGIN</a>                 | 309              | 25 (8.1)       | 6 (1.9)                | 19 (6.1)                 | 0.040         | <0.0001 | 0.0009               |
| <a href="#">GO IMMUNE SYSTEM PROCESS</a>                                    | 1860             | 83 (4.5)       | 19 (1)                 | 64 (3.4)                 | 0.039         | <0.0001 | 0.0009               |
| <a href="#">GO INFLAMMATORY RESPONSE</a>                                    | 430              | 29 (6.7)       | 6 (1.4)                | 23 (5.3)                 | 0.039         | <0.0001 | 0.0009               |
| <a href="#">GO CELL MOTILITY</a>                                            | 782              | 41 (5.2)       | 5 (0.6)                | 36 (4.6)                 | 0.038         | <0.0001 | 0.0009               |
| <a href="#">GO RESPONSE TO BACTERIUM</a>                                    | 506              | 30 (5.9)       | 8 (1.6)                | 22 (4.3)                 | 0.037         | <0.0001 | 0.0009               |
| <a href="#">GO POSITIVE REGULATION OF LOCOMOTION</a>                        | 393              | 26 (6.6)       | 5 (1.3)                | 21 (5.3)                 | 0.037         | <0.0001 | 0.0009               |
| <a href="#">GO DEFENSE RESPONSE</a>                                         | 1158             | 53 (4.6)       | 13 (1.1)               | 40 (3.5)                 | 0.037         | <0.0001 | 0.0009               |
| <a href="#">GO LOCOMOTION</a>                                               | 1037             | 48 (4.6)       | 6 (0.6)                | 42 (4.1)                 | 0.036         | <0.0001 | 0.0009               |
| <a href="#">GO RESPONSE TO LIPID</a>                                        | 844              | 41 (4.9)       | 8 (0.9)                | 33 (3.9)                 | 0.036         | <0.0001 | 0.0009               |
| <a href="#">GO POSITIVE REGULATION OF RESPONSE TO STIMULUS</a>              | 1802             | 74 (4.1)       | 17 (0.9)               | 57 (3.2)                 | 0.036         | <0.0001 | 0.0009               |
| <a href="#">GO POSITIVE REGULATION OF INTRACELLULAR SIGNAL TRANSDUCTION</a> | 824              | 40 (4.9)       | 12 (1.5)               | 28 (3.4)                 | 0.036         | <0.0001 | 0.0009               |
| <a href="#">GO REGULATION OF CELLULAR COMPONENT MOVEMENT</a>                | 716              | 36 (5)         | 7 (1)                  | 29 (4.1)                 | 0.035         | <0.0001 | 0.0009               |
| <a href="#">GO REGULATION OF RESPONSE TO WOUNDING</a>                       | 395              | 25 (6.3)       | 6 (1.5)                | 19 (4.8)                 | 0.035         | <0.0001 | 0.0009               |
| <a href="#">GO POSITIVE REGULATION OF PHOSPHORUS METABOLIC PROCESS</a>      | 968              | 44 (4.5)       | 11 (1.1)               | 33 (3.4)                 | 0.035         | <0.0001 | 0.0009               |
| <a href="#">GO REGULATION OF CYTOKINE PRODUCTION</a>                        | 529              | 29 (5.5)       | 5 (0.9)                | 24 (4.5)                 | 0.035         | <0.0001 | 0.0009               |
| <a href="#">GO REGULATION OF ANATOMICAL STRUCTURE MORPHOGENESIS</a>         | 953              | 42 (4.4)       | 8 (0.8)                | 34 (3.6)                 | 0.034         | <0.0001 | 0.0009               |
| <a href="#">GO REGULATION OF VASCULATURE DEVELOPMENT</a>                    | 218              | 18 (8.3)       | 4 (1.8)                | 14 (6.4)                 | 0.034         | <0.0001 | 0.0009               |

**Supplementary Table 15:** GO Biological Processes enriched in differentially expressed genes at Day 14 post-second vaccination compared to pre-first vaccination (RNA-Seq). Results are sorted by FDR adjusted p-value and Jaccard similarity index. To determine significantly enriched gene sets, DE genes were used. Top 50 results are listed. (continued)

| Gene Set Name                                              | Gene Set Genes # | DE Genes N (%) | Up-reg. DE Genes N (%) | Down-reg. DE Genes N (%) | Jaccard Index | P-Value | FDR Adjusted P-Value |
|------------------------------------------------------------|------------------|----------------|------------------------|--------------------------|---------------|---------|----------------------|
| GO TAXIS                                                   | 436              | 25 (5.7)       | 5 (1.1)                | 20 (4.6)                 | 0.033         | <0.0001 | 0.0009               |
| GO LEUKOCYTE MIGRATION                                     | 252              | 19 (7.5)       | 5 (2)                  | 14 (5.6)                 | 0.033         | <0.0001 | 0.0009               |
| GO POSITIVE REGULATION OF TRANSPORT                        | 877              | 39 (4.4)       | 8 (0.9)                | 31 (3.5)                 | 0.033         | <0.0001 | 0.0009               |
| GO NEGATIVE REGULATION OF MULTICELLULAR ORGANISMAL PROCESS | 918              | 40 (4.4)       | 7 (0.8)                | 33 (3.6)                 | 0.033         | <0.0001 | 0.0009               |
| GO POSITIVE REGULATION OF MULTICELLULAR ORGANISMAL PROCESS | 1304             | 52 (4)         | 9 (0.7)                | 43 (3.3)                 | 0.033         | <0.0001 | 0.0009               |
| GO REGULATION OF INFLAMMATORY RESPONSE                     | 280              | 19 (6.8)       | 5 (1.8)                | 14 (5)                   | 0.032         | <0.0001 | 0.0009               |
| GO REGULATION OF IMMUNE RESPONSE                           | 803              | 35 (4.4)       | 5 (0.6)                | 30 (3.7)                 | 0.032         | <0.0001 | 0.0009               |
| GO POSITIVE REGULATION OF CELL PROLIFERATION               | 769              | 34 (4.4)       | 11 (1.4)               | 23 (3)                   | 0.032         | <0.0001 | 0.0009               |
| GO CELL CHEMOTAXIS                                         | 156              | 15 (9.6)       | 5 (3.2)                | 10 (6.4)                 | 0.031         | <0.0001 | 0.0009               |
| GO POSITIVE REGULATION OF CELL COMMUNICATION               | 1444             | 54 (3.7)       | 13 (0.9)               | 41 (2.8)                 | 0.031         | <0.0001 | 0.0009               |
| GO REGULATION OF IMMUNE SYSTEM PROCESS                     | 1321             | 50 (3.8)       | 9 (0.7)                | 41 (3.1)                 | 0.031         | <0.0001 | 0.0009               |
| GO POSITIVE REGULATION OF DEVELOPMENTAL PROCESS            | 1055             | 42 (4)         | 9 (0.9)                | 33 (3.1)                 | 0.031         | <0.0001 | 0.0009               |
| GO REGULATION OF ENDOCYTOSIS                               | 194              | 16 (8.2)       | 0 (0)                  | 16 (8.2)                 | 0.031         | <0.0001 | 0.0009               |
| GO POSITIVE REGULATION OF VASCULATURE DEVELOPMENT          | 128              | 14 (10.9)      | 1 (0.8)                | 13 (10.2)                | 0.031         | <0.0001 | 0.0009               |
| GO REGULATION OF INTRACELLULAR SIGNAL TRANSDUCTION         | 1546             | 56 (3.6)       | 15 (1)                 | 41 (2.7)                 | 0.031         | <0.0001 | 0.0009               |
| GO RESPONSE TO OXYGEN CONTAINING COMPOUND                  | 1311             | 49 (3.7)       | 7 (0.5)                | 42 (3.2)                 | 0.031         | <0.0001 | 0.0009               |
| GO RESPONSE TO BIOTIC STIMULUS                             | 846              | 35 (4.1)       | 10 (1.2)               | 25 (3)                   | 0.030         | <0.0001 | 0.0009               |
| GO REGULATION OF RESPONSE TO EXTERNAL STIMULUS             | 883              | 36 (4.1)       | 8 (0.9)                | 28 (3.2)                 | 0.030         | <0.0001 | 0.0009               |
| GO POSITIVE REGULATION OF IMMUNE SYSTEM PROCESS            | 818              | 34 (4.2)       | 9 (1.1)                | 25 (3.1)                 | 0.030         | <0.0001 | 0.0009               |
| GO RESPONSE TO EXTERNAL STIMULUS                           | 1723             | 60 (3.5)       | 11 (0.6)               | 49 (2.8)                 | 0.030         | <0.0001 | 0.0009               |
| GO POSITIVE REGULATION OF RESPONSE TO EXTERNAL STIMULUS    | 288              | 18 (6.2)       | 6 (2.1)                | 12 (4.2)                 | 0.030         | <0.0001 | 0.0009               |
| GO REGULATION OF CELL PROLIFERATION                        | 1400             | 50 (3.6)       | 12 (0.9)               | 38 (2.7)                 | 0.030         | <0.0001 | 0.0009               |
| GO CELLULAR RESPONSE TO BIOTIC STIMULUS                    | 157              | 14 (8.9)       | 4 (2.5)                | 10 (6.4)                 | 0.029         | <0.0001 | 0.0009               |
| GO REGULATION OF DEFENSE RESPONSE                          | 723              | 30 (4.1)       | 6 (0.8)                | 24 (3.3)                 | 0.029         | <0.0001 | 0.0009               |
| GO REGULATION OF PHOSPHORUS METABOLIC PROCESS              | 1511             | 52 (3.4)       | 13 (0.9)               | 39 (2.6)                 | 0.029         | <0.0001 | 0.0009               |
| GO LEUKOCYTE CHEMOTAXIS                                    | 112              | 12 (10.7)      | 5 (4.5)                | 7 (6.2)                  | 0.028         | <0.0001 | 0.0009               |
| GO POSITIVE REGULATION OF RESPONSE TO WOUNDING             | 157              | 13 (8.3)       | 5 (3.2)                | 8 (5.1)                  | 0.027         | <0.0001 | 0.0009               |
| GO POSITIVE REGULATION OF STAT CASCADE                     | 72               | 10 (13.9)      | 4 (5.6)                | 6 (8.3)                  | 0.025         | <0.0001 | 0.0009               |
| GO MYELOID LEUKOCYTE MIGRATION                             | 95               | 10 (10.5)      | 4 (4.2)                | 6 (6.3)                  | 0.024         | <0.0001 | 0.0009               |
| GO POSITIVE REGULATION OF INFLAMMATORY RESPONSE            | 110              | 10 (9.1)       | 4 (3.6)                | 6 (5.5)                  | 0.023         | <0.0001 | 0.0009               |
| GO GRANULOCYTE MIGRATION                                   | 71               | 9 (12.7)       | 3 (4.2)                | 6 (8.5)                  | 0.023         | <0.0001 | 0.0009               |
| GO NEGATIVE REGULATION OF INTERFERON GAMMA PRODUCTION      | 32               | 6 (18.8)       | 1 (3.1)                | 5 (15.6)                 | 0.017         | <0.0001 | 0.0009               |

**Supplementary Table 16:** GO Cellular Components enriched in differentially expressed genes at Day 14 post-second vaccination compared to pre-first vaccination (RNA-Seq). Results are sorted by FDR adjusted p-value and Jaccard similarity index. To determine significantly enriched gene sets, DE genes were used.

| Gene Set Name                                             | Gene Set Genes # | DE Genes N (%) | Up-reg. DE Genes N (%) | Down-reg. DE Genes N (%) | Jaccard Index | P-Value | FDR Adjusted P-Value |
|-----------------------------------------------------------|------------------|----------------|------------------------|--------------------------|---------------|---------|----------------------|
| <a href="#">GO EXTRACELLULAR SPACE</a>                    | 1290             | 64 (5)         | 13 (1)                 | 51 (4)                   | 0.041         | <0.0001 | 0.0019               |
| <a href="#">GO CELL SURFACE</a>                           | 711              | 41 (5.8)       | 5 (0.7)                | 36 (5.1)                 | 0.041         | <0.0001 | 0.0019               |
| <a href="#">GO INTRINSIC COMPONENT OF PLASMA MEMBRANE</a> | 1526             | 70 (4.6)       | 4 (0.3)                | 66 (4.3)                 | 0.039         | <0.0001 | 0.0019               |
| <a href="#">GO EXTERNAL SIDE OF PLASMA MEMBRANE</a>       | 223              | 13 (5.8)       | 4 (1.8)                | 9 (4)                    | 0.024         | 0.0002  | 0.0333               |

**Supplementary Table 17:** GO Molecular Functions enriched in differentially expressed genes at Day 14 post-second vaccination compared to pre-first vaccination (RNA-Seq). Results are sorted by FDR adjusted p-value and Jaccard similarity index. To determine significantly enriched gene sets, DE genes were used.

| Gene Set Name                                     | Gene Set Genes # | DE Genes N (%) | Up-reg. DE Genes N (%) | Down-reg. DE Genes N (%) | Jaccard Index | P-Value | FDR Adjusted P-Value |
|---------------------------------------------------|------------------|----------------|------------------------|--------------------------|---------------|---------|----------------------|
| <a href="#">GO CYTOKINE ACTIVITY</a>              | 210              | 20 (9.5)       | 10 (4.8)               | 10 (4.8)                 | 0.038         | <0.0001 | 0.003                |
| <a href="#">GO CYTOKINE RECEPTOR BINDING</a>      | 261              | 20 (7.7)       | 10 (3.8)               | 10 (3.8)                 | 0.035         | <0.0001 | 0.003                |
| <a href="#">GO RECEPTOR BINDING</a>               | 1391             | 53 (3.8)       | 11 (0.8)               | 42 (3)                   | 0.032         | <0.0001 | 0.003                |
| <a href="#">GO GROWTH FACTOR RECEPTOR BINDING</a> | 127              | 11 (8.7)       | 1 (0.8)                | 10 (7.9)                 | 0.024         | <0.0001 | 0.0045               |
| <a href="#">GO RECEPTOR ACTIVITY</a>              | 1510             | 46 (3)         | 3 (0.2)                | 43 (2.8)                 | 0.025         | <0.0001 | 0.0054               |
| <a href="#">GO GROWTH FACTOR ACTIVITY</a>         | 150              | 10 (6.7)       | 3 (2)                  | 7 (4.7)                  | 0.021         | 0.0001  | 0.0195               |
| <a href="#">GO IMMUNOGLOBULIN BINDING</a>         | 21               | 4 (19)         | 0 (0)                  | 4 (19)                   | 0.011         | 0.0003  | 0.0373               |
| <a href="#">GO CHEMOKINE RECEPTOR BINDING</a>     | 55               | 5 (9.1)        | 3 (5.5)                | 2 (3.6)                  | 0.013         | 0.0003  | 0.0394               |
| <a href="#">GO CCR CHEMOKINE RECEPTOR BINDING</a> | 34               | 4 (11.8)       | 2 (5.9)                | 2 (5.9)                  | 0.011         | 0.0004  | 0.042                |

**Supplementary Table 18:** KEGG Pathways enriched in differentially expressed genes at Day 28 post-second vaccination compared to pre-first vaccination (RNA-Seq). Results are sorted by FDR adjusted p-value and Jaccard similarity index. To determine significantly enriched gene sets, DE genes were used.

| Gene Set Name                                          | Gene Set Genes # | DE Genes N (%) | Up-reg. DE Genes N (%) | Down-reg. DE Genes N (%) | Jaccard Index | P-Value | FDR Adjusted P-Value |
|--------------------------------------------------------|------------------|----------------|------------------------|--------------------------|---------------|---------|----------------------|
| <a href="#">Cytokine-cytokine receptor interaction</a> | 257              | 20 (7.8)       | 6 (2.3)                | 14 (5.4)                 | 0.038         | <0.0001 | 0.0016               |
| <a href="#">Fluid shear stress and atherosclerosis</a> | 137              | 13 (9.5)       | 1 (0.7)                | 12 (8.8)                 | 0.032         | <0.0001 | 0.0016               |
| <a href="#">Osteoclast differentiation</a>             | 124              | 12 (9.7)       | 2 (1.6)                | 10 (8.1)                 | 0.030         | <0.0001 | 0.0024               |
| <a href="#">Hematopoietic cell lineage</a>             | 91               | 9 (9.9)        | 2 (2.2)                | 7 (7.7)                  | 0.024         | <0.0001 | 0.0024               |

**Supplementary Table 18:** KEGG Pathways enriched in differentially expressed genes at Day 28 post-second vaccination compared to pre-first vaccination (RNA-Seq). Results are sorted by FDR adjusted p-value and Jaccard similarity index. To determine significantly enriched gene sets, DE genes were used. (continued)

| Gene Set Name                                       | Gene Set Genes # | DE Genes N (%) | Up-reg. DE Genes N (%) | Down-reg. DE Genes N (%) | Jaccard Index | P-Value | FDR Adjusted P-Value |
|-----------------------------------------------------|------------------|----------------|------------------------|--------------------------|---------------|---------|----------------------|
| <a href="#">Amoebiasis</a>                          | 93               | 10 (10.8)      | 2 (2.2)                | 8 (8.6)                  | 0.027         | <0.0001 | 0.0026               |
| <a href="#">Proteoglycans in cancer</a>             | 200              | 15 (7.5)       | 0 (0)                  | 15 (7.5)                 | 0.032         | <0.0001 | 0.0043               |
| <a href="#">IL-17 signaling pathway</a>             | 92               | 8 (8.7)        | 3 (3.3)                | 5 (5.4)                  | 0.021         | 0.0002  | 0.0083               |
| <a href="#">Tuberculosis</a>                        | 172              | 11 (6.4)       | 1 (0.6)                | 10 (5.8)                 | 0.024         | 0.0007  | 0.0201               |
| <a href="#">Phagosome</a>                           | 145              | 10 (6.9)       | 0 (0)                  | 10 (6.9)                 | 0.024         | 0.0007  | 0.0201               |
| <a href="#">Rheumatoid arthritis</a>                | 85               | 7 (8.2)        | 3 (3.5)                | 4 (4.7)                  | 0.019         | 0.0006  | 0.0201               |
| <a href="#">Staphylococcus aureus infection</a>     | 52               | 6 (11.5)       | 0 (0)                  | 6 (11.5)                 | 0.018         | 0.0007  | 0.0201               |
| <a href="#">Complement and coagulation cascades</a> | 76               | 7 (9.2)        | 0 (0)                  | 7 (9.2)                  | 0.020         | 0.0009  | 0.0246               |

**Supplementary Table 19:** MSigDB Reactome Pathways enriched in differentially expressed genes at Day 28 post-second vaccination compared to pre-first vaccination (RNA-Seq). Results are sorted by FDR adjusted p-value and Jaccard similarity index. To determine significantly enriched gene sets, DE genes were used.

| Gene Set Name                                                           | Gene Set Genes # | DE Genes N (%) | Up-reg. DE Genes N (%) | Down-reg. DE Genes N (%) | Jaccard Index | P-Value | FDR Adjusted P-Value |
|-------------------------------------------------------------------------|------------------|----------------|------------------------|--------------------------|---------------|---------|----------------------|
| <a href="#">REACTOME CELL SURFACE INTERACTIONS AT THE VASCULAR WALL</a> | 83               | 10 (12)        | 0 (0)                  | 10 (12)                  | 0.028         | <0.0001 | 0.0135               |

**Supplementary Table 20:** MSigDB Immunologic Signature Sets enriched in differentially expressed genes at Day 28 post-second vaccination compared to pre-first vaccination (RNA-Seq). Results are sorted by FDR adjusted p-value and Jaccard similarity index. To determine significantly enriched gene sets, DE genes were used. Top 50 results are listed.

| Gene Set Name                                                                                  | Gene Set Genes # | DE Genes N (%) | Up-reg. DE Genes N (%) | Down-reg. DE Genes N (%) | Jaccard Index | P-Value | FDR Adjusted P-Value |
|------------------------------------------------------------------------------------------------|------------------|----------------|------------------------|--------------------------|---------------|---------|----------------------|
| <a href="#">GSE10325 LUPUS CD4 TCELL VS LUPUS MYELOID DN</a>                                   | 188              | 41 (21.8)      | 0 (0)                  | 41 (21.8)                | 0.094         | <0.0001 | 0.0003               |
| <a href="#">GSE10325 LUPUS BCELL VS LUPUS MYELOID DN</a>                                       | 191              | 40 (20.9)      | 0 (0)                  | 40 (20.9)                | 0.091         | <0.0001 | 0.0003               |
| <a href="#">GSE22886 NAIVE CD8 TCELL VS MONOCYTE DN</a>                                        | 191              | 40 (20.9)      | 0 (0)                  | 40 (20.9)                | 0.091         | <0.0001 | 0.0003               |
| <a href="#">GSE34156 UNTREATED VS 24H NOD2 LIGAND TREATED MONOCYTE DN</a>                      | 182              | 39 (21.4)      | 0 (0)                  | 39 (21.4)                | 0.090         | <0.0001 | 0.0003               |
| <a href="#">GSE36888 UNTREATED VS IL2 TREATED TCELL 6H UP</a>                                  | 178              | 38 (21.3)      | 0 (0)                  | 38 (21.3)                | 0.089         | <0.0001 | 0.0003               |
| <a href="#">GSE34156 TLR1 TLR2 LIGAND VS NOD2 AND TLR1 TLR2 LIGAND 24H TREATED MONOCYTE...</a> | 179              | 37 (20.7)      | 0 (0)                  | 37 (20.7)                | 0.086         | <0.0001 | 0.0003               |
| <a href="#">GSE34156 UNTREATED VS 6H TLR1 TLR2 LIGAND TREATED MONOCYTE UP</a>                  | 178              | 36 (20.2)      | 0 (0)                  | 36 (20.2)                | 0.084         | <0.0001 | 0.0003               |

**Supplementary Table 20:** MSigDB Immunologic Signature Sets enriched in differentially expressed genes at Day 28 post-second vaccination compared to pre-first vaccination (RNA-Seq). Results are sorted by FDR adjusted p-value and Jaccard similarity index. To determine significantly enriched gene sets, DE genes were used. Top 50 results are listed. (continued)

| Gene Set Name                                                   | Gene Set Genes # | DE Genes N (%) | Up-reg. DE Genes N (%) | Down-reg. DE Genes N (%) | Jaccard Index | P-Value | FDR Adjusted P-Value |
|-----------------------------------------------------------------|------------------|----------------|------------------------|--------------------------|---------------|---------|----------------------|
| GSE34156 NOD2 LIGAND VS TLR1 TLR2 LIGAND 6H TREATED MONOCYTE DN | 175              | 35 (20)        | 0 (0)                  | 35 (20)                  | 0.082         | <0.0001 | 0.0003               |
| GSE24634 TREG VS TCONV POST DAY10 IL4 CONVERSION DN             | 192              | 36 (18.8)      | 0 (0)                  | 36 (18.8)                | 0.081         | <0.0001 | 0.0003               |
| GSE29618 MONOCYTE VS PDC UP                                     | 187              | 34 (18.2)      | 0 (0)                  | 34 (18.2)                | 0.077         | <0.0001 | 0.0003               |
| GSE36888 UNTREATED VS IL2 TREATED STAT5 AB KNOCKIN TCELL 2H UP  | 177              | 33 (18.6)      | 0 (0)                  | 33 (18.6)                | 0.076         | <0.0001 | 0.0003               |
| GSE36888 UNTREATED VS IL2 TREATED TCELL 17H DN                  | 180              | 33 (18.3)      | 0 (0)                  | 33 (18.3)                | 0.076         | <0.0001 | 0.0003               |
| GSE36888 UNTREATED VS IL2 TREATED STAT5 AB KNOCKIN TCELL 6H UP  | 174              | 31 (17.8)      | 0 (0)                  | 31 (17.8)                | 0.072         | <0.0001 | 0.0003               |
| GSE29618 MONOCYTE VS MDC UP                                     | 189              | 32 (16.9)      | 0 (0)                  | 32 (16.9)                | 0.072         | <0.0001 | 0.0003               |
| GSE6269 FLU VS STAPH AUREUS INF PBMC DN                         | 158              | 29 (18.4)      | 0 (0)                  | 29 (18.4)                | 0.069         | <0.0001 | 0.0003               |
| GSE29618 MONOCYTE VS PDC DAY7 FLU VACCINE UP                    | 190              | 31 (16.3)      | 0 (0)                  | 31 (16.3)                | 0.069         | <0.0001 | 0.0003               |
| GSE22886 NAIVE CD4 TCELL VS MONOCYTE DN                         | 192              | 30 (15.6)      | 0 (0)                  | 30 (15.6)                | 0.067         | <0.0001 | 0.0003               |
| GSE24634 TEFF VS TCONV DAY3 IN CULTURE DN                       | 177              | 29 (16.4)      | 0 (0)                  | 29 (16.4)                | 0.066         | <0.0001 | 0.0003               |
| GSE29618 MONOCYTE VS MDC DAY7 FLU VACCINE UP                    | 188              | 29 (15.4)      | 0 (0)                  | 29 (15.4)                | 0.065         | <0.0001 | 0.0003               |
| GSE22886 NAIVE TCELL VS MONOCYTE DN                             | 191              | 29 (15.2)      | 0 (0)                  | 29 (15.2)                | 0.064         | <0.0001 | 0.0003               |
| GSE22886 NAIVE BCELL VS MONOCYTE DN                             | 195              | 29 (14.9)      | 0 (0)                  | 29 (14.9)                | 0.064         | <0.0001 | 0.0003               |
| GSE30971 CTRL VS LPS STIM MACROPHAGE WBP7 KO 4H UP              | 171              | 27 (15.8)      | 0 (0)                  | 27 (15.8)                | 0.062         | <0.0001 | 0.0003               |
| GSE29618 BCELL VS MONOCYTE DAY7 FLU VACCINE DN                  | 189              | 28 (14.8)      | 0 (0)                  | 28 (14.8)                | 0.062         | <0.0001 | 0.0003               |
| GSE10325 BCELL VS MYELOID DN                                    | 183              | 27 (14.8)      | 0 (0)                  | 27 (14.8)                | 0.061         | <0.0001 | 0.0003               |
| GSE11057 PBMC VS MEM CD4 TCELL UP                               | 185              | 27 (14.6)      | 0 (0)                  | 27 (14.6)                | 0.060         | <0.0001 | 0.0003               |
| GSE41176 UNSTIM VS ANTI IGM STIM TAK1 KO BCELL 24H DN           | 179              | 26 (14.5)      | 1 (0.6)                | 25 (14)                  | 0.059         | <0.0001 | 0.0003               |
| GSE30971 WBP7 HET VS KO MACROPHAGE DN                           | 180              | 26 (14.4)      | 1 (0.6)                | 25 (13.9)                | 0.059         | <0.0001 | 0.0003               |
| GSE30971 CTRL VS LPS STIM MACROPHAGE WBP7 HET 2H UP             | 166              | 25 (15.1)      | 0 (0)                  | 25 (15.1)                | 0.058         | <0.0001 | 0.0003               |
| GSE30971 CTRL VS LPS STIM MACROPHAGE WBP7 KO 2H UP              | 170              | 25 (14.7)      | 0 (0)                  | 25 (14.7)                | 0.058         | <0.0001 | 0.0003               |
| GSE24634 TEFF VS TCONV DAY10 IN CULTURE DN                      | 185              | 25 (13.5)      | 0 (0)                  | 25 (13.5)                | 0.056         | <0.0001 | 0.0003               |
| GSE25123 WT VS PPARG KO MACROPHAGE UP                           | 173              | 24 (13.9)      | 0 (0)                  | 24 (13.9)                | 0.055         | <0.0001 | 0.0003               |
| GSE6269 HEALTHY VS STAPH PNEUMO INF PBMC DN                     | 160              | 23 (14.4)      | 0 (0)                  | 23 (14.4)                | 0.054         | <0.0001 | 0.0003               |
| GSE30971 WBP7 HET VS KO MACROPHAGE 2H LPS STIM DN               | 182              | 24 (13.2)      | 1 (0.5)                | 23 (12.6)                | 0.054         | <0.0001 | 0.0003               |
| GSE10325 CD4 TCELL VS MYELOID DN                                | 185              | 24 (13)        | 0 (0)                  | 24 (13)                  | 0.053         | <0.0001 | 0.0003               |
| GSE22886 NAIVE BCELL VS NEUTROPHIL DN                           | 185              | 24 (13)        | 0 (0)                  | 24 (13)                  | 0.053         | <0.0001 | 0.0003               |
| GSE11057 CD4 EFF MEM VS PBMC DN                                 | 186              | 24 (12.9)      | 0 (0)                  | 24 (12.9)                | 0.053         | <0.0001 | 0.0003               |
| GSE29618 BCELL VS MONOCYTE DN                                   | 187              | 24 (12.8)      | 0 (0)                  | 24 (12.8)                | 0.053         | <0.0001 | 0.0003               |
| GSE24634 TREG VS TCONV POST DAY7 IL4 CONVERSION DN              | 188              | 23 (12.2)      | 0 (0)                  | 23 (12.2)                | 0.051         | <0.0001 | 0.0003               |
| GSE25123 CTRL VS ROSIGLITAZONE STIM PPARG KO MACROPHAGE UP      | 181              | 22 (12.2)      | 0 (0)                  | 22 (12.2)                | 0.049         | <0.0001 | 0.0003               |
| GSE36888 UNTREATED VS IL2 TREATED STAT5 AB KNOCKIN TCELL 17H UP | 172              | 21 (12.2)      | 0 (0)                  | 21 (12.2)                | 0.048         | <0.0001 | 0.0003               |
| GSE36888 STAT5 AB KNOCKIN VS WT TCELL IL2 TREATED 17H DN        | 179              | 21 (11.7)      | 0 (0)                  | 21 (11.7)                | 0.047         | <0.0001 | 0.0003               |

**Supplementary Table 20:** MSigDB Immunologic Signature Sets enriched in differentially expressed genes at Day 28 post-second vaccination compared to pre-first vaccination (RNA-Seq). Results are sorted by FDR adjusted p-value and Jaccard similarity index. To determine significantly enriched gene sets, DE genes were used. Top 50 results are listed. (continued)

| Gene Set Name                                                                           | Gene Set Genes # | DE Genes N (%) | Up-reg. DE Genes N (%) | Down-reg. DE Genes N (%) | Jaccard Index | P-Value | FDR Adjusted P-Value |
|-----------------------------------------------------------------------------------------|------------------|----------------|------------------------|--------------------------|---------------|---------|----------------------|
| <a href="#">GSE24634 TEFF VS TCONV DAY7 IN CULTURE DN</a>                               | 184              | 21 (11.4)      | 0 (0)                  | 21 (11.4)                | 0.046         | <0.0001 | 0.0003               |
| <a href="#">GSE9988 ANTI TREM1 AND LPS VS VEHICLE TREATED MONOCYTES UP</a>              | 163              | 20 (12.3)      | 1 (0.6)                | 19 (11.7)                | 0.046         | <0.0001 | 0.0003               |
| <a href="#">GSE22140 GERMFREE VS SPF MOUSE CD4 TCELL DN</a>                             | 187              | 21 (11.2)      | 0 (0)                  | 21 (11.2)                | 0.046         | <0.0001 | 0.0003               |
| <a href="#">GSE3982 MAC VS NKCELL UP</a>                                                | 183              | 20 (10.9)      | 1 (0.5)                | 19 (10.4)                | 0.044         | <0.0001 | 0.0003               |
| <a href="#">GSE24634 IL4 VS CTRL TREATED NAIVE CD4 TCELL DAY5 UP</a>                    | 186              | 20 (10.8)      | 2 (1.1)                | 18 (9.7)                 | 0.044         | <0.0001 | 0.0003               |
| <a href="#">GSE22886 DAY0 VS DAY1 MONOCYTE IN CULTURE DN</a>                            | 189              | 20 (10.6)      | 1 (0.5)                | 19 (10.1)                | 0.044         | <0.0001 | 0.0003               |
| <a href="#">GSE25123 IL4 VS IL4 AND ROSIGLITAZONE STIM PPARG KO MACROPHAGE DAY10 DN</a> | 174              | 19 (10.9)      | 1 (0.6)                | 18 (10.3)                | 0.043         | <0.0001 | 0.0003               |
| <a href="#">GSE2128 CTRL VS MIMETOPE NEGATIVE SELECTION DP THYMOCYTE NOD UP</a>         | 177              | 19 (10.7)      | 0 (0)                  | 19 (10.7)                | 0.043         | <0.0001 | 0.0003               |
| <a href="#">GSE19198 CTRL VS IL21 TREATED TCELL 1H DN</a>                               | 178              | 19 (10.7)      | 0 (0)                  | 19 (10.7)                | 0.042         | <0.0001 | 0.0003               |

**Supplementary Table 21:** GO Biological Processes enriched in differentially expressed genes at Day 28 post-second vaccination compared to pre-first vaccination (RNA-Seq). Results are sorted by FDR adjusted p-value and Jaccard similarity index. To determine significantly enriched gene sets, DE genes were used. Top 50 results are listed.

| Gene Set Name                                                               | Gene Set Genes # | DE Genes N (%) | Up-reg. DE Genes N (%) | Down-reg. DE Genes N (%) | Jaccard Index | P-Value | FDR Adjusted P-Value |
|-----------------------------------------------------------------------------|------------------|----------------|------------------------|--------------------------|---------------|---------|----------------------|
| <a href="#">GO INFLAMMATORY RESPONSE</a>                                    | 430              | 35 (8.1)       | 4 (0.9)                | 31 (7.2)                 | 0.051         | <0.0001 | 0.0006               |
| <a href="#">GO LEUKOCYTE MIGRATION</a>                                      | 252              | 23 (9.1)       | 1 (0.4)                | 22 (8.7)                 | 0.044         | <0.0001 | 0.0006               |
| <a href="#">GO IMMUNE RESPONSE</a>                                          | 1028             | 55 (5.4)       | 7 (0.7)                | 48 (4.7)                 | 0.044         | <0.0001 | 0.0006               |
| <a href="#">GO RESPONSE TO MOLECULE OF BACTERIAL ORIGIN</a>                 | 309              | 25 (8.1)       | 3 (1)                  | 22 (7.1)                 | 0.044         | <0.0001 | 0.0006               |
| <a href="#">GO RESPONSE TO BACTERIUM</a>                                    | 506              | 32 (6.3)       | 3 (0.6)                | 29 (5.7)                 | 0.042         | <0.0001 | 0.0006               |
| <a href="#">GO REGULATION OF RESPONSE TO WOUNDING</a>                       | 395              | 27 (6.8)       | 1 (0.3)                | 26 (6.6)                 | 0.041         | <0.0001 | 0.0006               |
| <a href="#">GO CELL MOTILITY</a>                                            | 782              | 42 (5.4)       | 1 (0.1)                | 41 (5.2)                 | 0.041         | <0.0001 | 0.0006               |
| <a href="#">GO TAXIS</a>                                                    | 436              | 28 (6.4)       | 2 (0.5)                | 26 (6)                   | 0.040         | <0.0001 | 0.0006               |
| <a href="#">GO LOCOMOTION</a>                                               | 1037             | 51 (4.9)       | 3 (0.3)                | 48 (4.6)                 | 0.040         | <0.0001 | 0.0006               |
| <a href="#">GO POSITIVE REGULATION OF LOCOMOTION</a>                        | 393              | 26 (6.6)       | 2 (0.5)                | 24 (6.1)                 | 0.040         | <0.0001 | 0.0006               |
| <a href="#">GO REGULATION OF CYTOKINE PRODUCTION</a>                        | 529              | 31 (5.9)       | 3 (0.6)                | 28 (5.3)                 | 0.039         | <0.0001 | 0.0006               |
| <a href="#">GO IMMUNE SYSTEM PROCESS</a>                                    | 1860             | 80 (4.3)       | 9 (0.5)                | 71 (3.8)                 | 0.039         | <0.0001 | 0.0006               |
| <a href="#">GO REGULATION OF INFLAMMATORY RESPONSE</a>                      | 280              | 21 (7.5)       | 1 (0.4)                | 20 (7.1)                 | 0.038         | <0.0001 | 0.0006               |
| <a href="#">GO POSITIVE REGULATION OF INTRACELLULAR SIGNAL TRANSDUCTION</a> | 824              | 40 (4.9)       | 7 (0.8)                | 33 (4)                   | 0.037         | <0.0001 | 0.0006               |
| <a href="#">GO REGULATION OF CELLULAR COMPONENT MOVEMENT</a>                | 716              | 36 (5)         | 4 (0.6)                | 32 (4.5)                 | 0.037         | <0.0001 | 0.0006               |
| <a href="#">GO POSITIVE REGULATION OF CYTOKINE PRODUCTION</a>               | 352              | 23 (6.5)       | 3 (0.9)                | 20 (5.7)                 | 0.037         | <0.0001 | 0.0006               |
| <a href="#">GO POSITIVE REGULATION OF RESPONSE TO WOUNDING</a>              | 157              | 16 (10.2)      | 1 (0.6)                | 15 (9.6)                 | 0.037         | <0.0001 | 0.0006               |

**Supplementary Table 21:** GO Biological Processes enriched in differentially expressed genes at Day 28 post-second vaccination compared to pre-first vaccination (RNA-Seq). Results are sorted by FDR adjusted p-value and Jaccard similarity index. To determine significantly enriched gene sets, DE genes were used. Top 50 results are listed. (continued)

| Gene Set Name                                              | Gene Set Genes # | DE Genes N (%) | Up-reg. DE Genes N (%) | Down-reg. DE Genes N (%) | Jaccard Index | P-Value | FDR Adjusted P-Value |
|------------------------------------------------------------|------------------|----------------|------------------------|--------------------------|---------------|---------|----------------------|
| GO WOUND HEALING                                           | 446              | 26 (5.8)       | 0 (0)                  | 26 (5.8)                 | 0.037         | <0.0001 | 0.0006               |
| GO RESPONSE TO LIPID                                       | 844              | 40 (4.7)       | 4 (0.5)                | 36 (4.3)                 | 0.037         | <0.0001 | 0.0006               |
| GO RESPONSE TO WOUNDING                                    | 538              | 29 (5.4)       | 0 (0)                  | 29 (5.4)                 | 0.036         | <0.0001 | 0.0006               |
| GO POSITIVE REGULATION OF RESPONSE TO EXTERNAL STIMULUS    | 288              | 20 (6.9)       | 2 (0.7)                | 18 (6.2)                 | 0.036         | <0.0001 | 0.0006               |
| GO DEFENSE RESPONSE                                        | 1158             | 50 (4.3)       | 5 (0.4)                | 45 (3.9)                 | 0.036         | <0.0001 | 0.0006               |
| GO REGULATION OF DEFENSE RESPONSE                          | 723              | 35 (4.8)       | 2 (0.3)                | 33 (4.6)                 | 0.036         | <0.0001 | 0.0006               |
| GO POSITIVE REGULATION OF RESPONSE TO STIMULUS             | 1802             | 72 (4)         | 8 (0.4)                | 64 (3.6)                 | 0.036         | <0.0001 | 0.0006               |
| GO POSITIVE REGULATION OF MULTICELLULAR ORGANISMAL PROCESS | 1304             | 54 (4.1)       | 4 (0.3)                | 50 (3.8)                 | 0.035         | <0.0001 | 0.0006               |
| GO CELL CHEMOTAXIS                                         | 156              | 15 (9.6)       | 1 (0.6)                | 14 (9)                   | 0.035         | <0.0001 | 0.0006               |
| GO ENDOCYTOSIS                                             | 485              | 26 (5.4)       | 0 (0)                  | 26 (5.4)                 | 0.035         | <0.0001 | 0.0006               |
| GO POSITIVE REGULATION OF CELL PROLIFERATION               | 769              | 35 (4.6)       | 5 (0.7)                | 30 (3.9)                 | 0.034         | <0.0001 | 0.0006               |
| GO REGULATION OF IMMUNE RESPONSE                           | 803              | 36 (4.5)       | 1 (0.1)                | 35 (4.4)                 | 0.034         | <0.0001 | 0.0006               |
| GO REGULATION OF RESPONSE TO EXTERNAL STIMULUS             | 883              | 38 (4.3)       | 3 (0.3)                | 35 (4)                   | 0.034         | <0.0001 | 0.0006               |
| GO RESPONSE TO OXYGEN CONTAINING COMPOUND                  | 1311             | 51 (3.9)       | 3 (0.2)                | 48 (3.7)                 | 0.033         | <0.0001 | 0.0006               |
| GO REGULATION OF CELL ADHESION                             | 589              | 28 (4.8)       | 3 (0.5)                | 25 (4.2)                 | 0.033         | <0.0001 | 0.0006               |
| GO SINGLE ORGANISM CELL ADHESION                           | 434              | 23 (5.3)       | 3 (0.7)                | 20 (4.6)                 | 0.033         | <0.0001 | 0.0006               |
| GO REGULATION OF SECRETION                                 | 657              | 30 (4.6)       | 4 (0.6)                | 26 (4)                   | 0.033         | <0.0001 | 0.0006               |
| GO MOVEMENT OF CELL OR SUBCELLULAR COMPONENT               | 1196             | 47 (3.9)       | 2 (0.2)                | 45 (3.8)                 | 0.033         | <0.0001 | 0.0006               |
| GO REGULATION OF VESICLE MEDIATED TRANSPORT                | 438              | 23 (5.3)       | 2 (0.5)                | 21 (4.8)                 | 0.033         | <0.0001 | 0.0006               |
| GO REGULATION OF CYTOKINE BIOSYNTHETIC PROCESS             | 90               | 12 (13.3)      | 2 (2.2)                | 10 (11.1)                | 0.033         | <0.0001 | 0.0006               |
| GO POSITIVE REGULATION OF DEFENSE RESPONSE                 | 348              | 20 (5.7)       | 1 (0.3)                | 19 (5.5)                 | 0.032         | <0.0001 | 0.0006               |
| GO RESPONSE TO BIOTIC STIMULUS                             | 846              | 35 (4.1)       | 4 (0.5)                | 31 (3.7)                 | 0.032         | <0.0001 | 0.0006               |
| GO REGULATION OF INTERLEUKIN 6 PRODUCTION                  | 100              | 12 (12)        | 2 (2)                  | 10 (10)                  | 0.032         | <0.0001 | 0.0006               |
| GO POSITIVE REGULATION OF CELL COMMUNICATION               | 1444             | 53 (3.7)       | 7 (0.5)                | 46 (3.2)                 | 0.032         | <0.0001 | 0.0006               |
| GO REGULATION OF RESPONSE TO STRESS                        | 1383             | 51 (3.7)       | 4 (0.3)                | 47 (3.4)                 | 0.032         | <0.0001 | 0.0006               |
| GO RESPONSE TO CORTICOSTEROID                              | 170              | 14 (8.2)       | 1 (0.6)                | 13 (7.6)                 | 0.032         | <0.0001 | 0.0006               |
| GO RESPONSE TO EXTERNAL STIMULUS                           | 1723             | 61 (3.5)       | 5 (0.3)                | 56 (3.3)                 | 0.031         | <0.0001 | 0.0006               |
| GO POSITIVE REGULATION OF PHOSPHORUS METABOLIC PROCESS     | 968              | 38 (3.9)       | 6 (0.6)                | 32 (3.3)                 | 0.031         | <0.0001 | 0.0006               |
| GO REGULATION OF CYTOKINE SECRETION                        | 140              | 13 (9.3)       | 2 (1.4)                | 11 (7.9)                 | 0.031         | <0.0001 | 0.0006               |
| GO REGULATION OF CELL PROLIFERATION                        | 1400             | 51 (3.6)       | 5 (0.4)                | 46 (3.3)                 | 0.031         | <0.0001 | 0.0006               |
| GO POSITIVE REGULATION OF INFLAMMATORY RESPONSE            | 110              | 12 (10.9)      | 1 (0.9)                | 11 (10)                  | 0.031         | <0.0001 | 0.0006               |
| GO LEUKOCYTE CHEMOTAXIS                                    | 112              | 12 (10.7)      | 1 (0.9)                | 11 (9.8)                 | 0.031         | <0.0001 | 0.0006               |
| GO REGULATION OF ANATOMICAL STRUCTURE MORPHOGENESIS        | 953              | 37 (3.9)       | 4 (0.4)                | 33 (3.5)                 | 0.031         | <0.0001 | 0.0006               |

**Supplementary Table 22:** GO Cellular Components enriched in differentially expressed genes at Day 28 post-second vaccination compared to pre-first vaccination (RNA-Seq). Results are sorted by FDR adjusted p-value and Jaccard similarity index. To determine significantly enriched gene sets, DE genes were used.

| Gene Set Name                             | Gene Set Genes # | DE Genes N (%) | Up-reg. DE Genes N (%) | Down-reg. DE Genes N (%) | Jaccard Index | P-Value | FDR Adjusted P-Value |
|-------------------------------------------|------------------|----------------|------------------------|--------------------------|---------------|---------|----------------------|
| GO CELL SURFACE                           | 711              | 38 (5.3)       | 2 (0.3)                | 36 (5.1)                 | 0.040         | <0.0001 | 0.0019               |
| GO INTRINSIC COMPONENT OF PLASMA MEMBRANE | 1526             | 65 (4.3)       | 2 (0.1)                | 63 (4.1)                 | 0.037         | <0.0001 | 0.0019               |
| GO EXTRACELLULAR SPACE                    | 1290             | 51 (4)         | 6 (0.5)                | 45 (3.5)                 | 0.033         | <0.0001 | 0.0019               |
| GO EXTERNAL SIDE OF PLASMA MEMBRANE       | 223              | 12 (5.4)       | 1 (0.4)                | 11 (4.9)                 | 0.024         | 0.0003  | 0.0383               |
| GO FILOPODIUM MEMBRANE                    | 17               | 4 (23.5)       | 0 (0)                  | 4 (23.5)                 | 0.013         | 0.0003  | 0.0383               |
| GO RECEPTOR COMPLEX                       | 311              | 16 (5.1)       | 1 (0.3)                | 15 (4.8)                 | 0.027         | 0.0004  | 0.0398               |
| GO PHAGOCYTOTIC VESICLE                   | 78               | 7 (9)          | 0 (0)                  | 7 (9)                    | 0.019         | 0.0005  | 0.0398               |
| GO RUFFLE                                 | 147              | 10 (6.8)       | 1 (0.7)                | 9 (6.1)                  | 0.024         | 0.0007  | 0.0478               |

**Supplementary Table 23:** GO Molecular Functions enriched in differentially expressed genes at Day 28 post-second vaccination compared to pre-first vaccination (RNA-Seq). Results are sorted by FDR adjusted p-value and Jaccard similarity index. To determine significantly enriched gene sets, DE genes were used.

| Gene Set Name                                      | Gene Set Genes # | DE Genes N (%) | Up-reg. DE Genes N (%) | Down-reg. DE Genes N (%) | Jaccard Index | P-Value | FDR Adjusted P-Value |
|----------------------------------------------------|------------------|----------------|------------------------|--------------------------|---------------|---------|----------------------|
| GO RECEPTOR BINDING                                | 1391             | 59 (4.2)       | 5 (0.4)                | 54 (3.9)                 | 0.036         | <0.0001 | 0.0015               |
| GO GROWTH FACTOR RECEPTOR BINDING                  | 127              | 13 (10.2)      | 1 (0.8)                | 12 (9.4)                 | 0.032         | <0.0001 | 0.0015               |
| GO CYTOKINE RECEPTOR BINDING                       | 261              | 16 (6.1)       | 5 (1.9)                | 11 (4.2)                 | 0.030         | <0.0001 | 0.0015               |
| GO PEPTIDASE REGULATOR ACTIVITY                    | 199              | 13 (6.5)       | 0 (0)                  | 13 (6.5)                 | 0.027         | <0.0001 | 0.0015               |
| GO CYTOKINE ACTIVITY                               | 210              | 13 (6.2)       | 5 (2.4)                | 8 (3.8)                  | 0.027         | <0.0001 | 0.0015               |
| GO RECEPTOR ACTIVITY                               | 1510             | 45 (3)         | 2 (0.1)                | 43 (2.8)                 | 0.026         | <0.0001 | 0.0015               |
| GO PEPTIDASE INHIBITOR ACTIVITY                    | 164              | 12 (7.3)       | 0 (0)                  | 12 (7.3)                 | 0.027         | <0.0001 | 0.0023               |
| GO SERINE TYPE ENDOPEPTIDASE INHIBITOR ACTIVITY    | 88               | 9 (10.2)       | 0 (0)                  | 9 (10.2)                 | 0.025         | <0.0001 | 0.0023               |
| GO SIGNAL TRANSDUCER ACTIVITY                      | 1602             | 45 (2.8)       | 4 (0.2)                | 41 (2.6)                 | 0.024         | <0.0001 | 0.0049               |
| GO DEATH RECEPTOR ACTIVITY                         | 23               | 5 (21.7)       | 1 (4.3)                | 4 (17.4)                 | 0.016         | <0.0001 | 0.0049               |
| GO RAGE RECEPTOR BINDING                           | 11               | 3 (27.3)       | 0 (0)                  | 3 (27.3)                 | 0.010         | <0.0001 | 0.0049               |
| GO PLATELET DERIVED GROWTH FACTOR RECEPTOR BINDING | 14               | 4 (28.6)       | 0 (0)                  | 4 (28.6)                 | 0.013         | 0.0001  | 0.0105               |
| GO SIGNALING RECEPTOR ACTIVITY                     | 1283             | 36 (2.8)       | 2 (0.2)                | 34 (2.7)                 | 0.023         | 0.0002  | 0.0114               |
| GO METALLOENDOPEPTIDASE ACTIVITY                   | 106              | 9 (8.5)        | 0 (0)                  | 9 (8.5)                  | 0.023         | 0.0002  | 0.0114               |
| GO EXTRACELLULAR MATRIX BINDING                    | 48               | 6 (12.5)       | 0 (0)                  | 6 (12.5)                 | 0.018         | 0.0002  | 0.0114               |
| GO GROWTH FACTOR ACTIVITY                          | 150              | 9 (6)          | 2 (1.3)                | 7 (4.7)                  | 0.021         | 0.0002  | 0.013                |
| GO METALLOPEPTIDASE ACTIVITY                       | 174              | 11 (6.3)       | 0 (0)                  | 11 (6.3)                 | 0.024         | 0.0005  | 0.026                |
| GO CYTOKINE BINDING                                | 83               | 7 (8.4)        | 1 (1.2)                | 6 (7.2)                  | 0.019         | 0.0007  | 0.033                |



**Supplementary Table 24:** Combination of genes correlated with  $\log_2$  transformed inverse Caspase-3 levels (RNA-Seq, Day 14 post-second vaccination). The predictor variables included standardized gene variables with  $\geq 1.5$  absolute fold change for the respective post-vaccination day in either treatment group. Selected genes: 16, mean squared error: 0.17, R-squared: 0.88). Sorted by absolute descending regression coefficient. Gene model summaries and annotations are based on Ensembl Version 90 (August 2017).

| Gene ID                         | Gene Name | Gene Description                                                                            | Gene Type                        | Transcripts | Max Exons | Coefficient |
|---------------------------------|-----------|---------------------------------------------------------------------------------------------|----------------------------------|-------------|-----------|-------------|
| <a href="#">ENSG00000225107</a> |           |                                                                                             | lincRNA                          | 1           | 4         | -0.0969     |
| <a href="#">ENSG00000005102</a> | MEOX1     | mesenchyme homeobox 1 [Source:HGNC Symbol;Acc:HGNC:7013]                                    | protein coding                   | 4           | 4         | -0.0934     |
| <a href="#">ENSG00000111537</a> | IFNG      | interferon gamma [Source:HGNC Symbol;Acc:HGNC:5438]                                         | protein coding                   | 1           | 4         | 0.0906      |
| <a href="#">ENSG00000109099</a> | PMP22     | peripheral myelin protein 22 [Source:HGNC Symbol;Acc:HGNC:9118]                             | protein coding                   | 9           | 6         | -0.0722     |
| <a href="#">ENSG00000227825</a> | SLC9A7P1  | solute carrier family 9 member 7 pseudogene 1 [Source:HGNC Symbol;Acc:HGNC:32679]           | transcribed processed pseudogene | 2           | 1         | 0.0704      |
| <a href="#">ENSG00000187957</a> | DNER      | delta/notch like EGF repeat containing [Source:HGNC Symbol;Acc:HGNC:24456]                  | protein coding                   | 2           | 13        | 0.0541      |
| <a href="#">ENSG00000087116</a> | ADAMTS2   | ADAM metalloproteinase with thrombospondin type 1 motif 2 [Source:HGNC Symbol;Acc:HGNC:218] | protein coding                   | 5           | 22        | 0.0521      |
| <a href="#">ENSG00000201428</a> | RN7SKP71  | RNA, 7SK small nuclear pseudogene 71 [Source:HGNC Symbol;Acc:HGNC:45795]                    | misc RNA                         | 1           | 1         | 0.0505      |
| <a href="#">ENSG00000174145</a> | NWD2      | NACHT and WD repeat domain containing 2 [Source:HGNC Symbol;Acc:HGNC:29229]                 | protein coding                   | 1           | 7         | 0.0463      |
| <a href="#">ENSG00000263740</a> | RN7SL4P   | RNA, 7SL, cytoplasmic 4, pseudogene [Source:HGNC Symbol;Acc:HGNC:10039]                     | misc RNA                         | 1           | 1         | 0.0425      |
| <a href="#">ENSG00000093134</a> | VNN3      | vanin 3 [Source:HGNC Symbol;Acc:HGNC:16431]                                                 | protein coding                   | 14          | 8         | 0.0359      |
| <a href="#">ENSG00000244734</a> | HBB       | hemoglobin subunit beta [Source:HGNC Symbol;Acc:HGNC:4827]                                  | protein coding                   | 5           | 4         | -0.0344     |
| <a href="#">ENSG00000206073</a> | SERPINB4  | serpin family B member 4 [Source:HGNC Symbol;Acc:HGNC:10570]                                | protein coding                   | 4           | 8         | -0.0235     |
| <a href="#">ENSG00000112116</a> | IL17F     | interleukin 17F [Source:HGNC Symbol;Acc:HGNC:16404]                                         | protein coding                   | 2           | 3         | 0.0209      |
| <a href="#">ENSG00000178726</a> | THBD      | thrombomodulin [Source:HGNC Symbol;Acc:HGNC:11784]                                          | protein coding                   | 1           | 1         | 0.0073      |
| <a href="#">ENSG00000211644</a> | IGLV1-51  | immunoglobulin lambda variable 1-51 [Source:HGNC Symbol;Acc:HGNC:5882]                      | IG V gene                        | 1           | 2         | 0.0064      |

**Supplementary Table 25:** Regularized canonical correlation analysis model summary statistics (RNA-Seq)

| Study Visit               | Variable Set 1 | Variable Set 2                           | Input Gene Variables | Input PCTC or Cytokine Variables | Cross Validation Score | Canonical Correlation (C1) | Canonical Correlation (C2) | Explained Variance Gene Variables (C1+C2) | Explained Variance PCTC or Cytokine Variables (C1+C2) |
|---------------------------|----------------|------------------------------------------|----------------------|----------------------------------|------------------------|----------------------------|----------------------------|-------------------------------------------|-------------------------------------------------------|
| Day 14 Post-Vaccination 2 | Gene Responses | Proliferating cytokine producing T-cells | 62                   | 14                               | 0.56                   | 1.00                       | 1.00                       | 0.53                                      | 0.18                                                  |
| Day 28 Post-Vaccination 2 | Gene Responses | Proliferating cytokine producing T-cells | 62                   | 15                               | 0.21                   | 0.95                       | 0.95                       | 0.29                                      | 0.43                                                  |
| Day 14 Post-Vaccination 2 | Gene Responses | Cytokine response                        | 62                   | 6                                | 0.55                   | 0.96                       | 0.94                       | 0.41                                      | 0.30                                                  |
| Day 28 Post-Vaccination 2 | Gene Responses | Cytokine response                        | 62                   | 6                                | 0.67                   | 0.95                       | 0.93                       | 0.21                                      | 0.58                                                  |

**Supplementary Table 26:** Number of excluded genes by gene type (RNA-Seq)

| Category/Chromosome                            | Genes |
|------------------------------------------------|-------|
| mitochondrial ribosomal RNA (Mt, <i>rRNA</i> ) | 2     |
| mitochondrial transfer RNA (Mt, <i>rRNA</i> )  | 22    |
| ribosomal RNA (rRNA)                           | 514   |
| located on X chromosome                        | 2367  |
| located on Y chromosome                        | 517   |
| Total                                          | 3422  |

**Supplementary Table 27:** Overview of gene sets used for the enrichment analysis (RNA-Seq).

| Category Type                     | Categories | Distinct #Genes In Set | Median #Genes Per Set |
|-----------------------------------|------------|------------------------|-----------------------|
| GO Biological Processes           | 4436       | 16612                  | 37                    |
| GO Cellular Components            | 580        | 13053                  | 47                    |
| GO Molecular Functions            | 901        | 15567                  | 32                    |
| KEGG Pathways                     | 321        | 7225                   | 70                    |
| MSigDB Immunologic Signature Sets | 4872       | 19756                  | 203                   |
| MSigDB Reactome Pathways          | 674        | 6559                   | 28                    |

**Supplementary Table 28:** Summary human reference genome alignment statistics (RNA-Seq)

|                                                   | Min   | Q1    | Median | Mean  | Q3    | Max    | SD    | MAD   | N  |
|---------------------------------------------------|-------|-------|--------|-------|-------|--------|-------|-------|----|
| Unmapped Reads [10 <sup>6</sup> ]                 | 0.36  | 0.64  | 0.89   | 1.49  | 1.67  | 6.74   | 1.47  | 0.44  | 35 |
| Total Mapped Reads [10 <sup>6</sup> ]             | 7.95  | 13.69 | 21.00  | 34.56 | 39.05 | 162.14 | 34.78 | 11.18 | 35 |
| Uniquely Mapped Reads [10 <sup>6</sup> ]          | 5.59  | 11.23 | 16.21  | 27.75 | 31.91 | 130.55 | 28.37 | 8.58  | 35 |
| Uniquely Mapped Reads [%]                         | 63.00 | 78.75 | 80.30  | 79.41 | 81.45 | 88.60  | 4.32  | 2.08  | 35 |
| Counted Fragments [10 <sup>6</sup> ]              | 3.62  | 8.06  | 11.67  | 19.95 | 23.02 | 97.39  | 20.66 | 6.48  | 35 |
| Uniquely Mapped Reads + Strand [10 <sup>6</sup> ] | 2.84  | 5.67  | 8.17   | 13.99 | 16.00 | 65.77  | 14.29 | 4.34  | 35 |
| Uniquely Mapped Reads - Strand [10 <sup>6</sup> ] | 2.75  | 5.55  | 8.05   | 13.76 | 15.91 | 64.78  | 14.08 | 4.26  | 35 |
| Median GC [%]                                     | 48.00 | 52.00 | 52.00  | 51.49 | 52.00 | 52.00  | 1.01  | 0.00  | 35 |
| Mean GC [%]                                       | 49.01 | 51.03 | 51.45  | 51.32 | 51.68 | 52.26  | 0.66  | 0.47  | 35 |

**Supplementary Table 29:** Summary human reference gene model alignment statistics (RNA-Seq)

|                                       | Min   | Q1     | Median | Mean   | Q3     | Max     | SD     | MAD   | N  |
|---------------------------------------|-------|--------|--------|--------|--------|---------|--------|-------|----|
| Exon Tags [%]                         | 72.83 | 80.17  | 81.35  | 81.28  | 82.68  | 86.65   | 2.78   | 1.87  | 35 |
| Intron Tags [%]                       | 12.43 | 16.19  | 17.35  | 17.48  | 18.55  | 25.87   | 2.72   | 1.78  | 35 |
| Intergenic Tags [%]                   | 0.91  | 1.18   | 1.24   | 1.24   | 1.32   | 1.40    | 0.12   | 0.11  | 35 |
| CDS Exons Tags Per Kb                 | 54.26 | 110.10 | 163.57 | 276.39 | 300.93 | 1381.28 | 287.33 | 91.17 | 35 |
| Intron Tags Per Kb                    | 1.28  | 1.79   | 2.58   | 4.36   | 5.21   | 17.85   | 4.19   | 1.53  | 35 |
| 3' UTR Tags Per Kb                    | 26.76 | 57.16  | 79.10  | 139.21 | 160.93 | 670.63  | 144.46 | 44.80 | 35 |
| 5' UTR Tags Per Kb                    | 19.90 | 46.88  | 67.67  | 116.02 | 137.99 | 548.17  | 118.61 | 34.77 | 35 |
| TSS upstream 10Kb Tags Per Kb         | 0.13  | 0.24   | 0.36   | 0.59   | 0.66   | 2.85    | 0.62   | 0.22  | 35 |
| TES downstream 10Kb Tags Per Kb       | 0.34  | 0.53   | 0.84   | 1.39   | 1.57   | 6.35    | 1.42   | 0.50  | 35 |
| Splicing Events [10 <sup>5</sup> ]    | 8.24  | 17.49  | 26.81  | 44.97  | 48.03  | 229.53  | 47.75  | 15.39 | 35 |
| Splicing Junctions [10 <sup>5</sup> ] | 1.01  | 1.24   | 1.40   | 1.53   | 1.71   | 2.70    | 0.39   | 0.25  | 35 |

**Supplementary Table 30:** Number of genes that passed the low expression cut off (RNA-Seq)

|                 | <b>Genes</b> |
|-----------------|--------------|
| <b>All Data</b> | 12596        |

**Supplementary Table 31:** Regularized linear logistic regression model summary statistics (RNA-Seq).  $\log_2$  transformed inverse Caspase-3 levels were used as the response variable. The predictor variables included standardized gene variables with  $\geq 1.5$  absolute fold change for the respective post-vaccination day in either treatment group. SDEG [%]: percent overlap between selected genes and differentially expressed genes.

| Study Visit                    | Input Gene Variables | Selected Gene Variables | Mean Squared Error | R-Squared | SDEG [%] | Opt. $\alpha$ | Opt. $\lambda$ | Intercept |
|--------------------------------|----------------------|-------------------------|--------------------|-----------|----------|---------------|----------------|-----------|
| Day 14 post-second vaccination | 62                   | 16                      | 0.17               | 0.88      | 56       | 0.19          | 0.2171         | 0.6729    |

**Supplementary Table 32:** List of R packages and versions used for the analyses presented in this report. R version 3.4.1 (2017-06-30) 'Single Candle' run on Ubuntu (release 16.04.2 LTS, x86-64-pc-linux-gnu (64-bit) platform).

| Package Name     | Version  | Package Name         | Version  | Package Name    | Version |
|------------------|----------|----------------------|----------|-----------------|---------|
| minqa            | 1.2.4    | parallel             | 3.4.1    | tidyr           | 0.7.1   |
| corpcor          | 1.6.9    | SummarizedExperiment | 1.6.3    | httpuv          | 1.3.5   |
| XVector          | 0.16.0   | SparseM              | 1.77     | stats4          | 3.4.1   |
| GenomicRanges    | 1.28.5   | memoise              | 1.1.0    | munsell         | 0.4.3   |
| MatrixModels     | 0.4-1    | gridExtra            | 2.3      | colorspace      | 1.3-2   |
| bit64            | 0.9-7    | stringi              | 1.1.5    | igraph          | 1.1.2   |
| AnnotationDbi    | 1.38.2   | S4Vectors            | 0.14.4   | png             | 0.1-7   |
| RSpectra         | 0.13-1   | GenomicFeatures      | 1.28.4   | Cairo           | 1.5-9   |
| codetools        | 0.2-15   | caTools              | 1.17.1   | openxlsx        | 4.0.17  |
| splines          | 3.4.1    | BiocGenerics         | 0.22.0   | stringr         | 1.2.0   |
| jsonlite         | 1.5      | BiocParallel         | 1.10.1   | glmnet          | 2.0-13  |
| nloptr           | 1.0.4    | chron                | 2.3-50   | foreach         | 1.4.4   |
| Rsamtools        | 1.28.0   | GenomeInfoDb         | 1.12.2   | Matrix          | 1.2-10  |
| pbkrtest         | 0.4-7    | rlang                | 0.1.2    | plyr            | 1.8.4   |
| GO.db            | 3.4.1    | pkgconfig            | 2.0.1    | mixOmics        | 6.3.2   |
| shiny            | 1.0.5    | matrixStats          | 0.52.2   | ggplot2         | 2.2.1   |
| compiler         | 3.4.1    | bitops               | 1.0-6    | lattice         | 0.20-35 |
| assertthat       | 0.2.0    | rgl                  | 0.98.1   | RColorBrewer    | 1.1-2   |
| lazyeval         | 0.2.0    | evaluate             | 0.10.1   | car             | 2.1-5   |
| htmltools        | 0.3.6    | purrr                | 0.2.3    | gtools          | 3.5.0   |
| quantreg         | 5.33     | bindr                | 0.1      | R.utils         | 2.5.0   |
| tools            | 3.4.1    | GenomicAlignments    | 1.12.2   | R.oo            | 1.21.0  |
| bindr            | 0.2      | htmlwidgets          | 0.9      | R.methodsS3     | 1.7.1   |
| gtable           | 0.2.0    | bit                  | 1.1-12   | pvclust         | 2.0-0   |
| glue             | 1.1.1    | magrittr             | 1.5      | sqldf           | 0.4-11  |
| GenomeInfoDbData | 0.99.0   | R6                   | 2.2.2    | RSQLite         | 2.0     |
| reshape2         | 1.4.2    | IRanges              | 2.10.3   | gsubfn          | 0.6-6   |
| dplyr            | 0.7.3    | DelayedArray         | 0.2.7    | proto           | 1.0.0   |
| Rcpp             | 0.12.12  | DBI                  | 0.7      | gplots          | 3.0.1   |
| Biobase          | 2.36.2   | mgcv                 | 1.8-17   | MASS            | 7.3-47  |
| Biostings        | 2.44.2   | RCurl                | 1.95-4.8 | goseq           | 1.28.0  |
| gdata            | 2.18.0   | nnet                 | 7.3-12   | geneLenDataBase | 1.12.0  |
| nlme             | 3.1-131  | tibble               | 1.3.4    | BiasedUrn       | 1.07    |
| rtracklayer      | 1.36.4   | rARPACK              | 0.11-0   | biomaRt         | 2.32.1  |
| iterators        | 1.0.9    | KernSmooth           | 2.23-15  | edgeR           | 3.18.1  |
| lme4             | 1.1-13   | ellipse              | 0.3-8    | limma           | 3.32.6  |
| mime             | 0.5      | locfit               | 1.5-9.1  | xtable          | 1.8-2   |
| XML              | 3.98-1.9 | grid                 | 3.4.1    | knitr           | 1.20    |
| zlibbioc         | 1.22.0   | blob                 | 1.1.0    |                 |         |
| scales           | 0.5.0    | digest               | 0.6.12   |                 |         |
